# Supplementary material for: Poecillastrosides, Steroidal Saponins from the Mediterranean Deep-Sea Sponge Poecillastra compressa (Bowerbank, 1866)
Source: PubMed Central journal article supplement (PMC5532641; doi:10.3390/md15070199), 2017-06-26
Supplement: marinedrugs-15-00199-s001.pdf [file marinedrugs-15-00199-s001.pdf]

# Poecillastrosides, Steroidal Saponins from the Mediterranean Deep-Sea Sponge *Poecillastra compressa* (Bowerbank, 1866)

Kevin Calabro <sup>1,2</sup>, Elaheh Lotfi Kalahroodi <sup>3</sup>, Daniel O. Rodrigues <sup>3,4</sup>, Caridad Díaz <sup>5</sup>, Mercedes de la Cruz <sup>5</sup>, Bastien Cautain <sup>5</sup>, Rémi Laville <sup>2</sup>, Fernando Reyes <sup>5</sup>, Thierry Pérez <sup>4</sup>, Bassam Soussi <sup>3,6,7</sup> and Olivier P. Thomas <sup>1,3,\*</sup>

<sup>1</sup> National University of Ireland Galway, School of Chemistry, Marine Biodiscovery, University Road, Galway, Ireland; kevin.calabro@unice.fr (K.C.); olivier.thomas@nuigalway.ie (O.T.)

<sup>2</sup> Cosmo International Ingredients, 855 avenue du Docteur Maurice Donat, 06250 Mougins., France; remi.laville@airliquide.com (R.L.)

<sup>3</sup> Université Côte d'Azur, CNRS, OCA, IRD, Géoazur, 250 rue Albert Einstein, 06560 Valbonne, France; elaheh.lotfi-kalahroodi@univ-rennes1.fr (E.L.K.); daniel4rodrigues@gmail.com (D.R.)

<sup>4</sup> Institut Méditerranéen de Biodiversité et d'Ecologie marine et continentale. CNRS – Aix-Marseille Univ – IRD – Univ Avignon. Station Marine d'Endoume, rue de la batterie des lions, 13007, Marseille, France; thierry.perez@imbe.fr (T.P.)

<sup>5</sup> Fundación MEDINA, Centro de Excelencia en Investigación de Medicamentos Innovadores en Andalucía, Avda. del Conocimiento 34, Parque Tecnológico de Ciencias de la Salud, E-18016, Armilla, Granada, Spain; caridad.diaz@medinaandalucia.es (C.D.); mercedes.delacruz@medinaandalucia.es (M.C.); bastien.cautain@medinaandalucia.es (B.C.); fernando.reyes@medinaandalucia.es (F.R.)

<sup>6</sup> Department of Marine Sciences, University of Gothenburg, PO Box 460, SE40530 Gothenburg, Sweden; bassam.soussi@gu.se (B.S.)

<sup>7</sup> Oman Centre for Marine Biotechnology, PO Box 236, PC 103, Muscat, Oman

P4 **Figure S1.** (-)-HRESIMS analysis of **1**  
P5 **Figure S2.** <sup>1</sup>H NMR spectrum of **1** at 500 MHz in CD<sub>3</sub>OD  
P6 **Figure S3.** COSY NMR spectrum of **1** at 500 MHz in CD<sub>3</sub>OD  
P7 **Figure S4.** TOCSY NMR spectrum of **1** at 500 MHz in CD<sub>3</sub>OD  
P8 **Figure S5.** NOESY NMR spectrum of **1** at 500 MHz in CD<sub>3</sub>OD  
P9 **Figure S6.** <sup>13</sup>C NMR spectrum of **1** at 125 MHz in CD<sub>3</sub>OD  
P10 **Figure S7.** HSQC NMR spectrum of **1** at 500 MHz in CD<sub>3</sub>OD  
P11 **Figure S8.** HMBC NMR spectrum of **1** at 500 MHz in CD<sub>3</sub>OD  
P12 **Figure S9.** (-)-HRESIMS analysis of **2**  
P13 **Figure S10.** <sup>1</sup>H NMR spectrum of **2** at 500 MHz in CD<sub>3</sub>OD  
P14 **Figure S11.** COSY NMR spectrum of **2** at 500 MHz in CD<sub>3</sub>OD  
P15 **Figure S12.** TOCSY NMR spectrum of **2** at 500 MHz in CD<sub>3</sub>OD  
P16 **Figure S13.** NOESY NMR spectrum of **2** at 500 MHz in CD<sub>3</sub>OD  
P17 **Figure S14.** <sup>13</sup>C NMR spectrum of **2** at 125 MHz in CD<sub>3</sub>OD  
P18 **Figure S15.** HSQC NMR spectrum of **2** at 500 MHz in CD<sub>3</sub>OD  
P19 **Figure S16.** HMBC NMR spectrum of **2** at 500 MHz in CD<sub>3</sub>OD  
P20 **Figure S17.** (-)-HRESIMS analysis of **3**  
P21 **Figure S18.** <sup>1</sup>H NMR spectrum of **3** at 500 MHz in CD<sub>3</sub>OD  
P22 **Figure S19.** COSY NMR spectrum of **3** at 500 MHz in CD<sub>3</sub>OD  
P23 **Figure S20.** TOCSY NMR spectrum of **3** at 500 MHz in CD<sub>3</sub>OD  
P24 **Figure S21.** <sup>13</sup>C NMR spectrum of **3** at 125 MHz in CD<sub>3</sub>OD  
P25 **Figure S22.** HSQC NMR spectrum of **3** at 500 MHz in CD<sub>3</sub>OD  
P26 **Figure S23.** PSYCHE\_1D NMR spectrum of **3** at 500 MHz in CD<sub>3</sub>OD  
P27 **Figure S24.** PS-HSQC NMR spectrum of **3** at 500 MHz in CD<sub>3</sub>OD  
P28 **Figure S25.** HMBC NMR spectrum of **3** at 500 MHz in CD<sub>3</sub>OD  
P29 **Figure S26.** (+)-HRESIMS analysis of **4**  
P30 **Figure S27.** <sup>1</sup>H NMR spectrum of **4** at 500 MHz in CD<sub>3</sub>OD  
P31 **Figure S28.** COSY NMR spectrum of **4** at 500 MHz in CD<sub>3</sub>OD  
P32 **Figure S29.** TOCSY NMR spectrum of **4** at 500 MHz in CD<sub>3</sub>OD  
P33 **Figure S30.** <sup>13</sup>C NMR spectrum of **4** at 125 MHz in CD<sub>3</sub>OD  
P34 **Figure S31.** HSQC NMR spectrum of **4** at 500 MHz in CD<sub>3</sub>OD  
P35 **Figure S32.** HMBC NMR spectrum of **4** at 500 MHz in CD<sub>3</sub>OD  
P36 **Figure S33.** (+)-HRESIMS analysis of **5**  
P37 **Figure S34.** <sup>1</sup>H NMR spectrum of **5** at 500 MHz in CD<sub>3</sub>OD  
P38 **Figure S35.** COSY NMR spectrum of **5** at 500 MHz in CD<sub>3</sub>OD  
P39 **Figure S36.** NOESY NMR spectrum of **5** at 500 MHz in CD<sub>3</sub>OD  
P40 **Figure S37.** <sup>13</sup>C NMR spectrum of **5** at 125 MHz in CD<sub>3</sub>OD  
P41 **Figure S38.** HSQC NMR spectrum of **5** at 500 MHz in CD<sub>3</sub>OD  
P42 **Figure S39.** HMBC NMR spectrum of **5** at 500 MHz in CD<sub>3</sub>OD  
P43 **Figure S40.** (+)-HRESIMS analysis of **6**  
P44 **Figure S41.** <sup>1</sup>H NMR spectrum of **6** at 600 MHz in CD<sub>3</sub>OD  
P45 **Figure S42.** COSY NMR spectrum of **6** at 600 MHz in CD<sub>3</sub>OD  
P46 **Figure S43.** <sup>13</sup>C NMR spectrum of **6** at 150 MHz in CD<sub>3</sub>OD  
P47 **Figure S44.** HSQC NMR spectrum of **6** at 600 MHz in CD<sub>3</sub>OD  
P48 **Figure S45.** HMBC NMR spectrum of **6** at 600 MHz in CD<sub>3</sub>OD

- P49 **Figure S46.** (+)-HRESIMS analysis of **7**
- P50 **Figure S47.**  $^1\text{H}$  NMR spectrum of **7** at 600 MHz in  $\text{CD}_3\text{OD}$
- P51 **Figure S48.** COSY NMR spectrum of **7** at 600 MHz in  $\text{CD}_3\text{OD}$
- P52 **Figure S49.** TOCSY NMR spectrum of **7** at 600 MHz in  $\text{CD}_3\text{OD}$
- P53 **Figure S50.**  $^{13}\text{C}$  NMR spectrum of **7** at 150 MHz in  $\text{CD}_3\text{OD}$
- P54 **Figure S51.** HSQC NMR spectrum of **7** at 600 MHz in  $\text{CD}_3\text{OD}$
- P55 **Figure S52.** HMBC NMR spectrum of **7** at 600 MHz in  $\text{CD}_3\text{OD}$
- P56 **Figure S53.** UPLC-qToF analysis of the four monosaccharide derivatives;  
**Figure S54.** Absolute configuration of pyranose moieties of **3**;  
**Figure S55.** ESI-(+) spectrum of D-(+)-glucose derivative

| Compound Formula                                | Name               | RT    | Algorithm           |
|-------------------------------------------------|--------------------|-------|---------------------|
| C <sub>40</sub> H <sub>68</sub> O <sub>13</sub> | Poecillastroside A | 6.251 | Spectrum Extraction |

6  
x10  
MS Spectrum

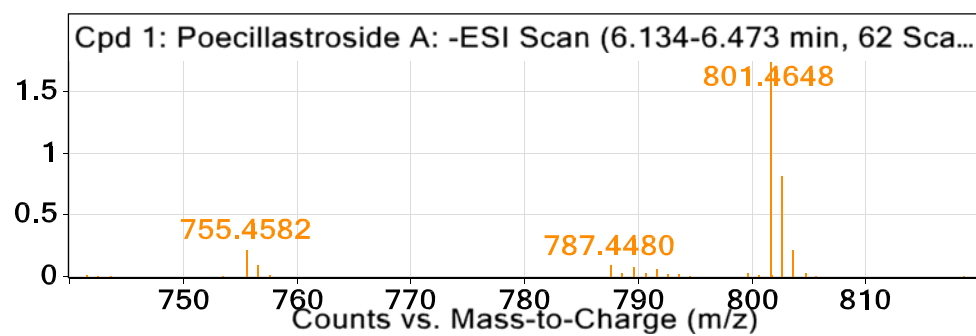

Figure S1. (-)-HRESIMS analysis of 1.

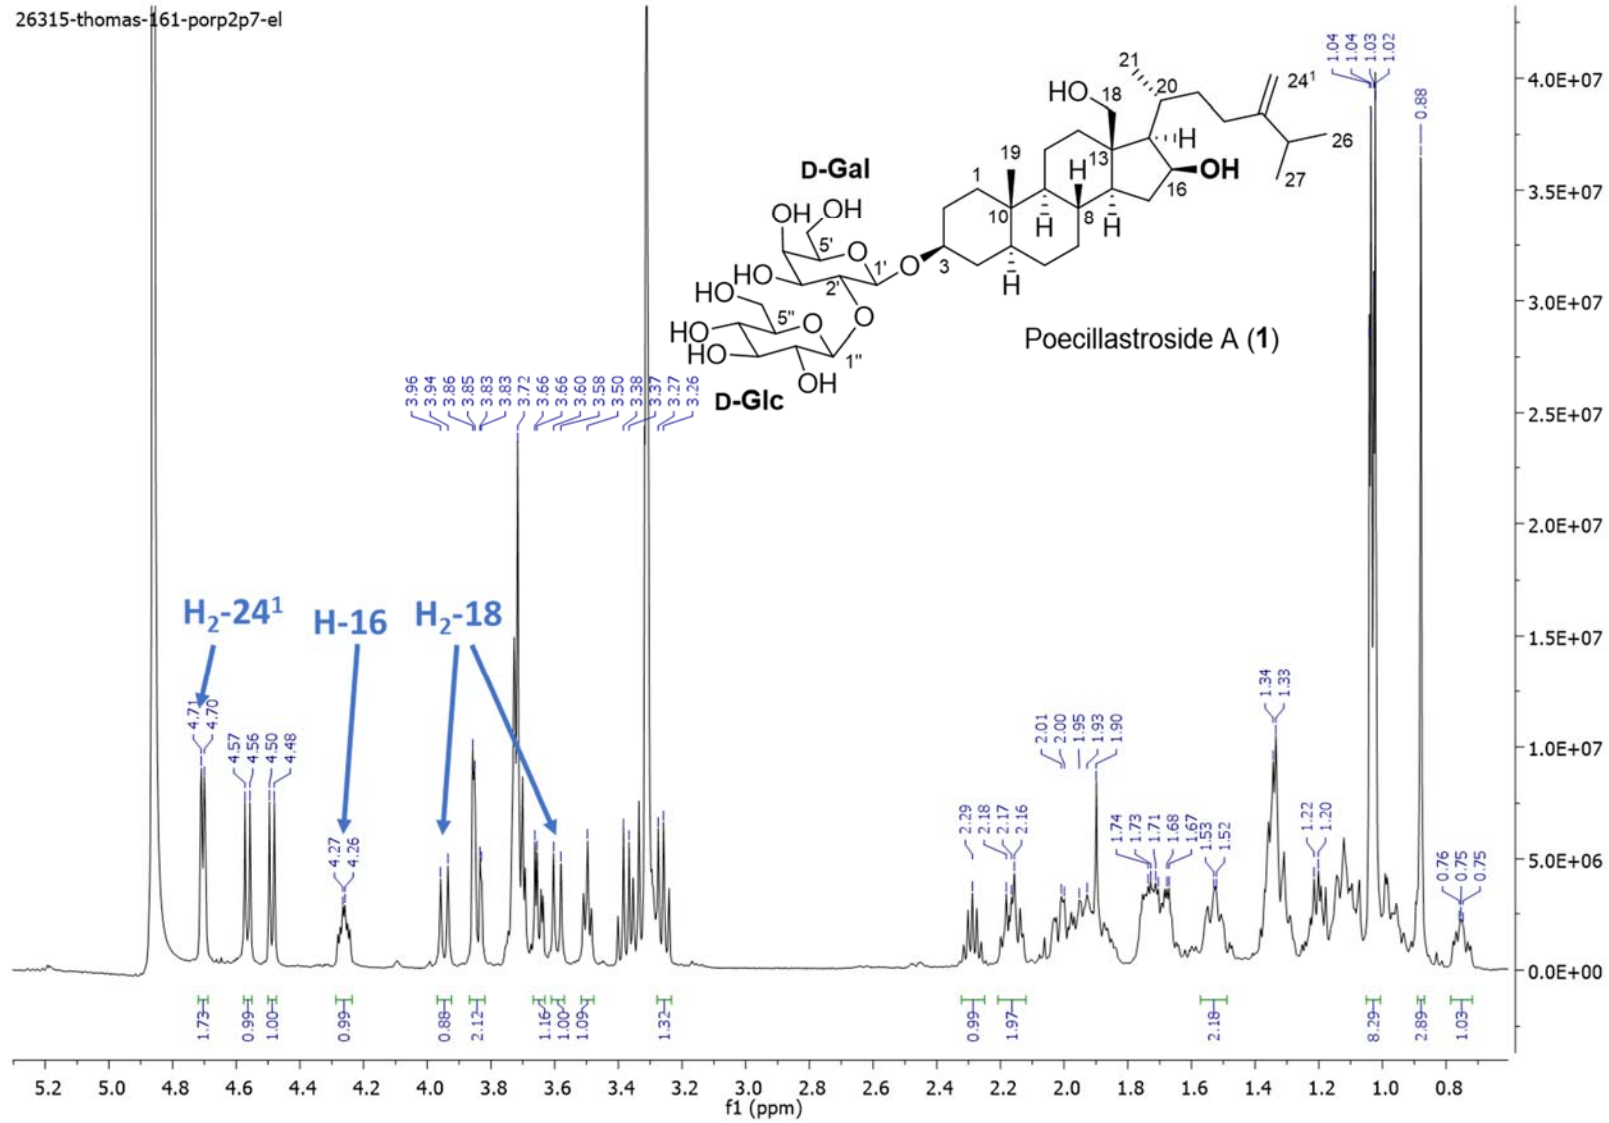

**Figure S2.** <sup>1</sup>H NMR spectrum of **1** at 500 MHz in CD<sub>3</sub>OD

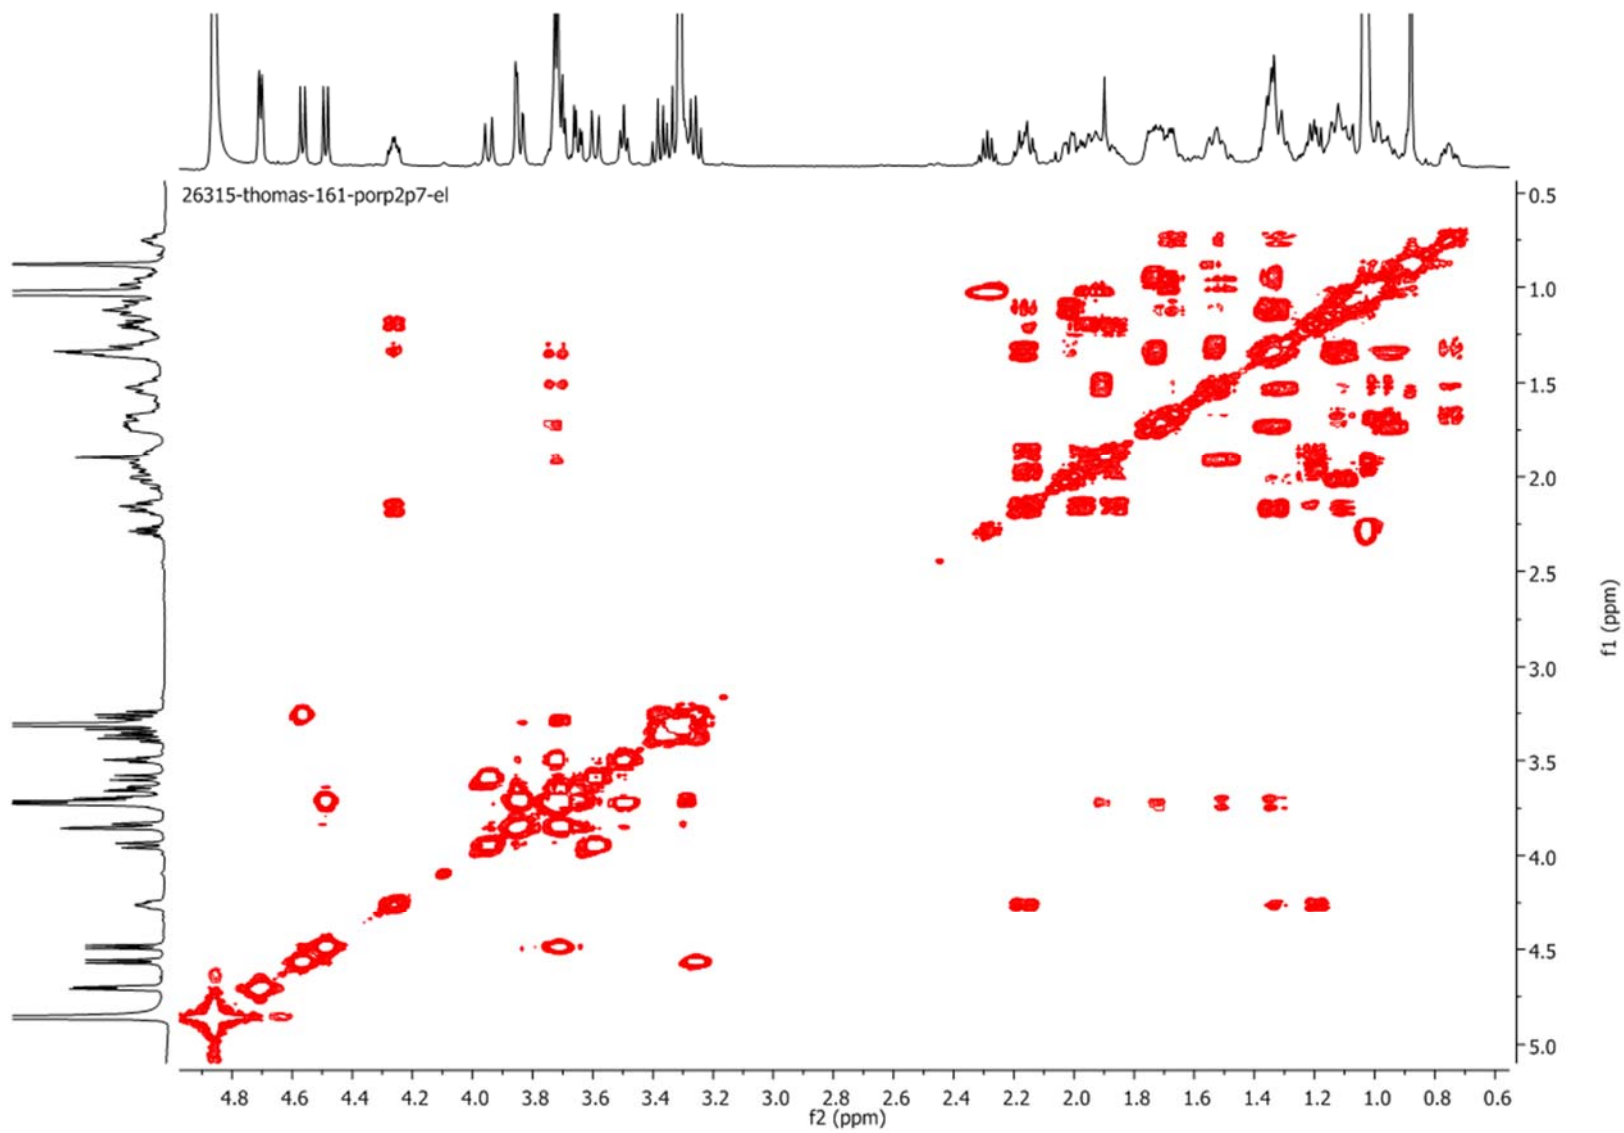

Figure S3. COSY NMR spectrum of **1** at 500 MHz in CD<sub>3</sub>OD

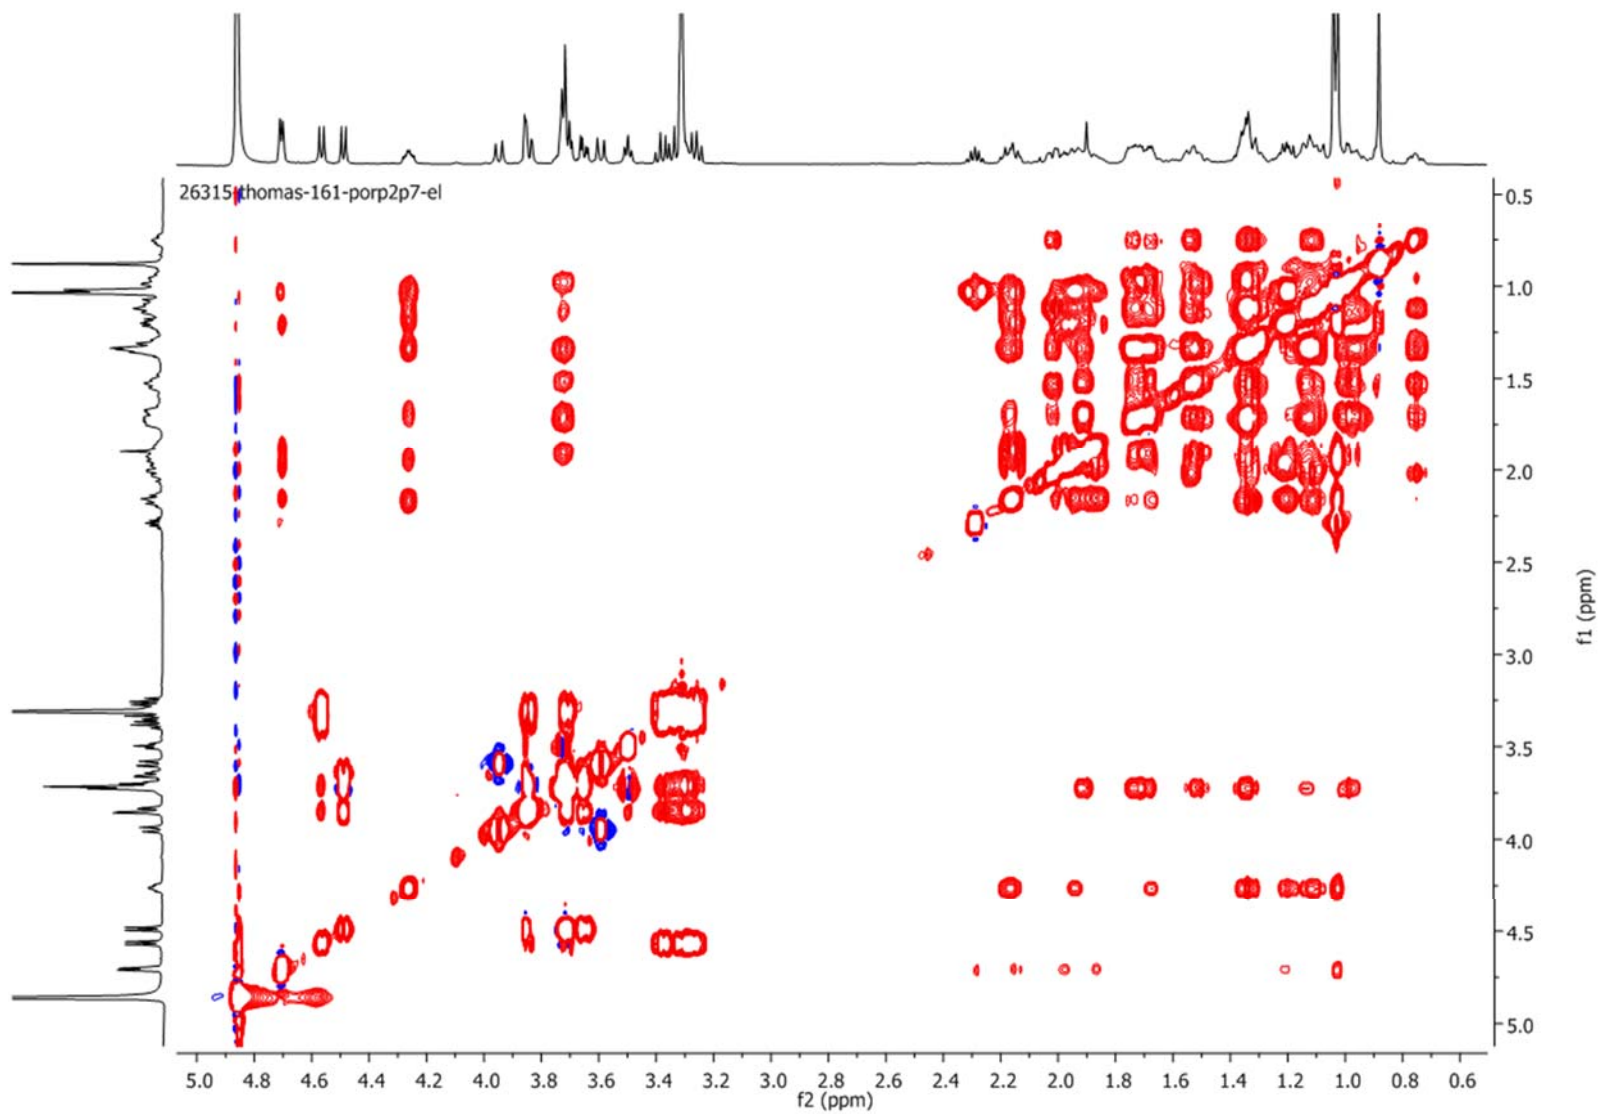

**Figure S4.** TOCSY NMR spectrum of **1** at 500 MHz in CD<sub>3</sub>OD

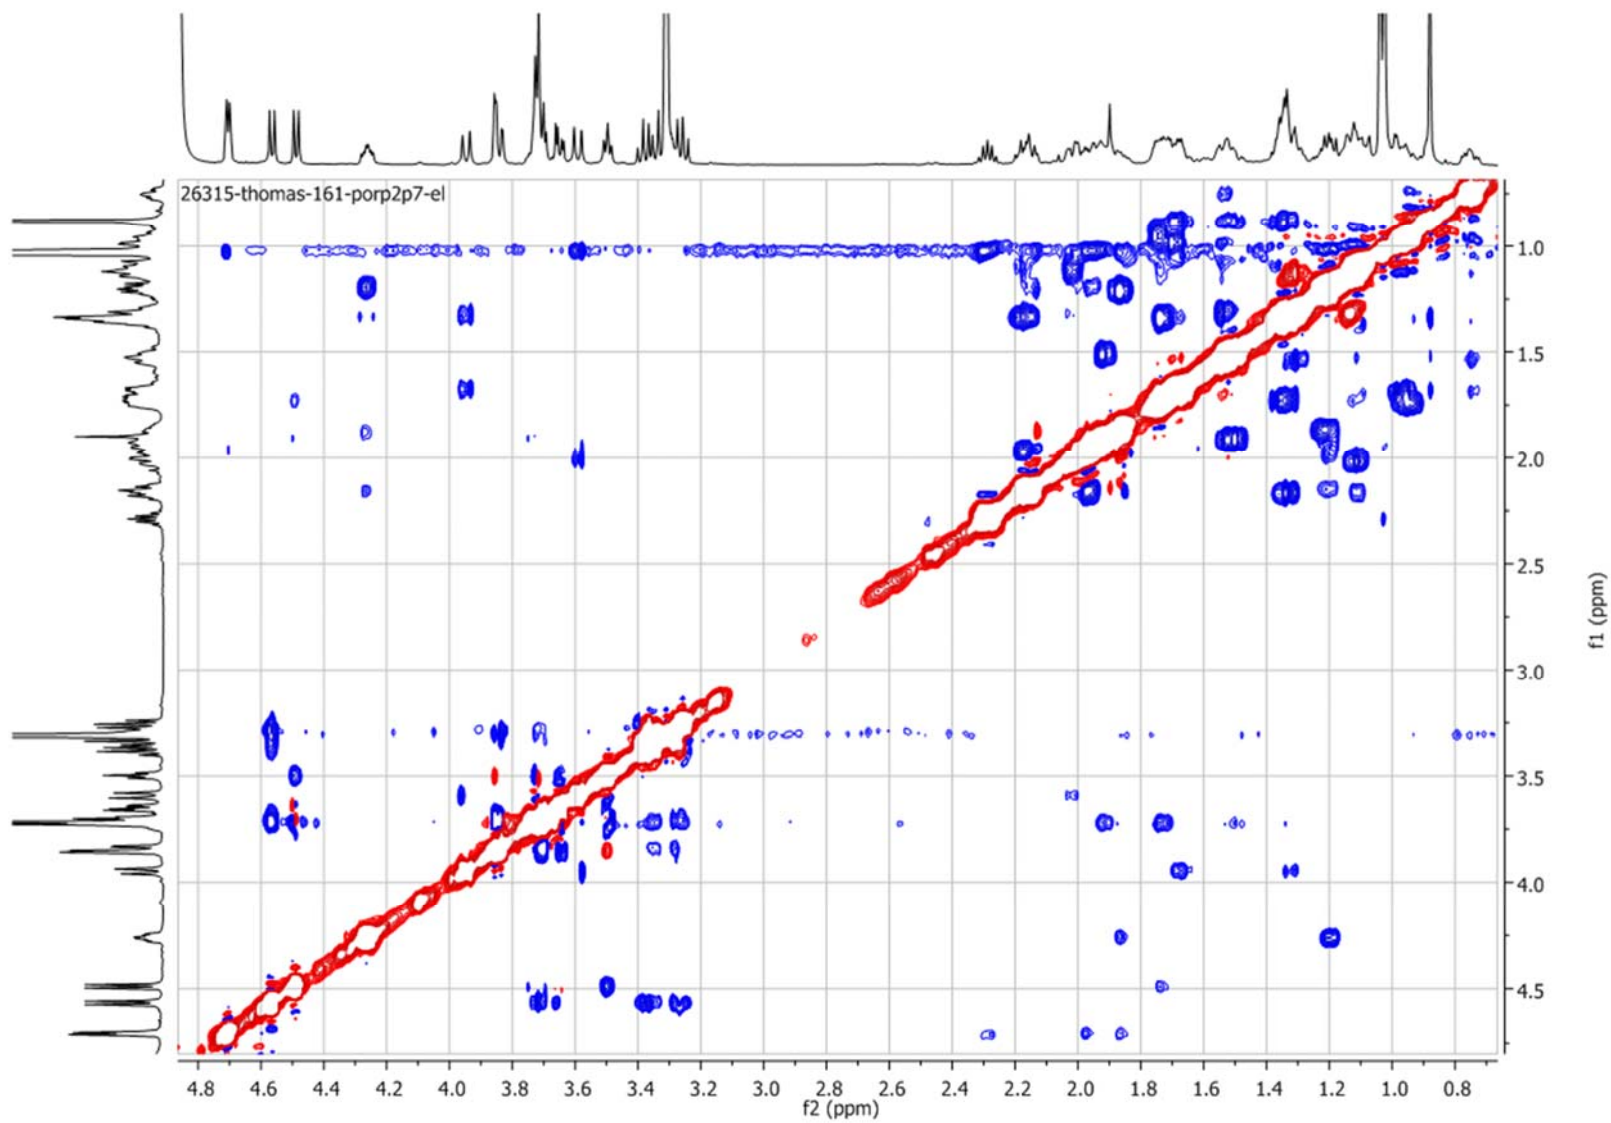

Figure S5. NOESY NMR spectrum of 1 at 500 MHz in CD<sub>3</sub>OD



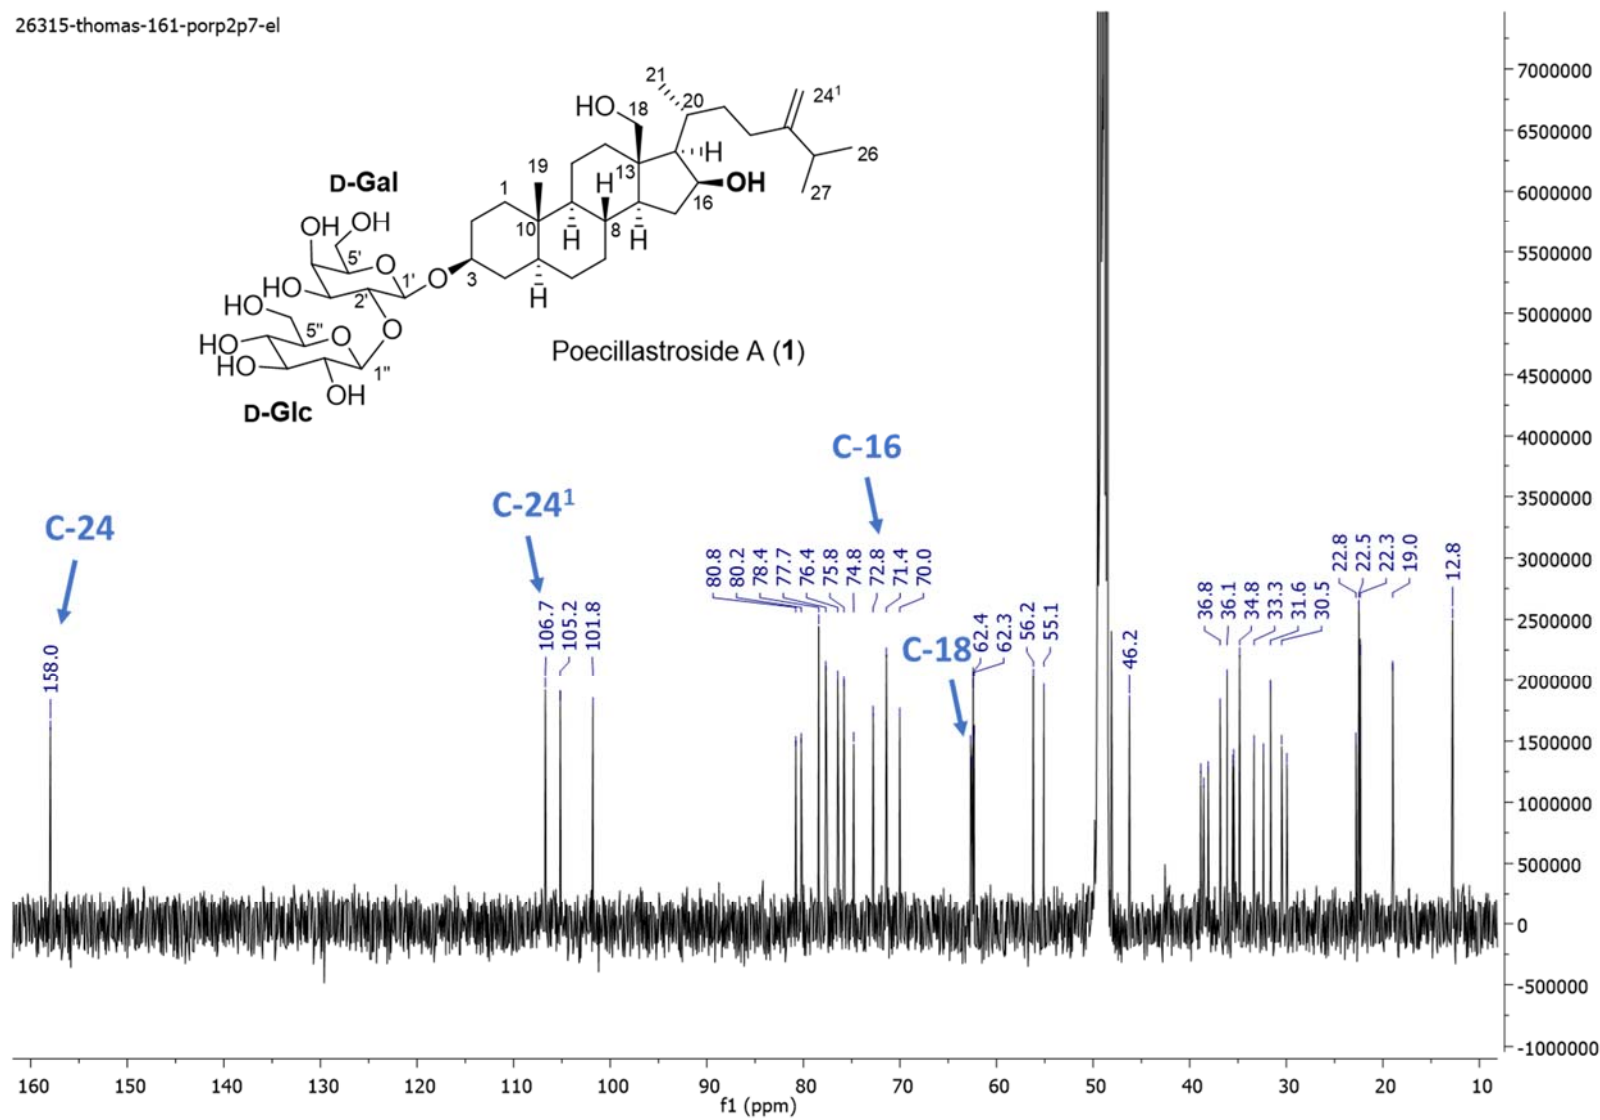

**Figure S6.**  $^{13}\text{C}$  NMR spectrum of **1** at 125 MHz in  $\text{CD}_3\text{OD}$

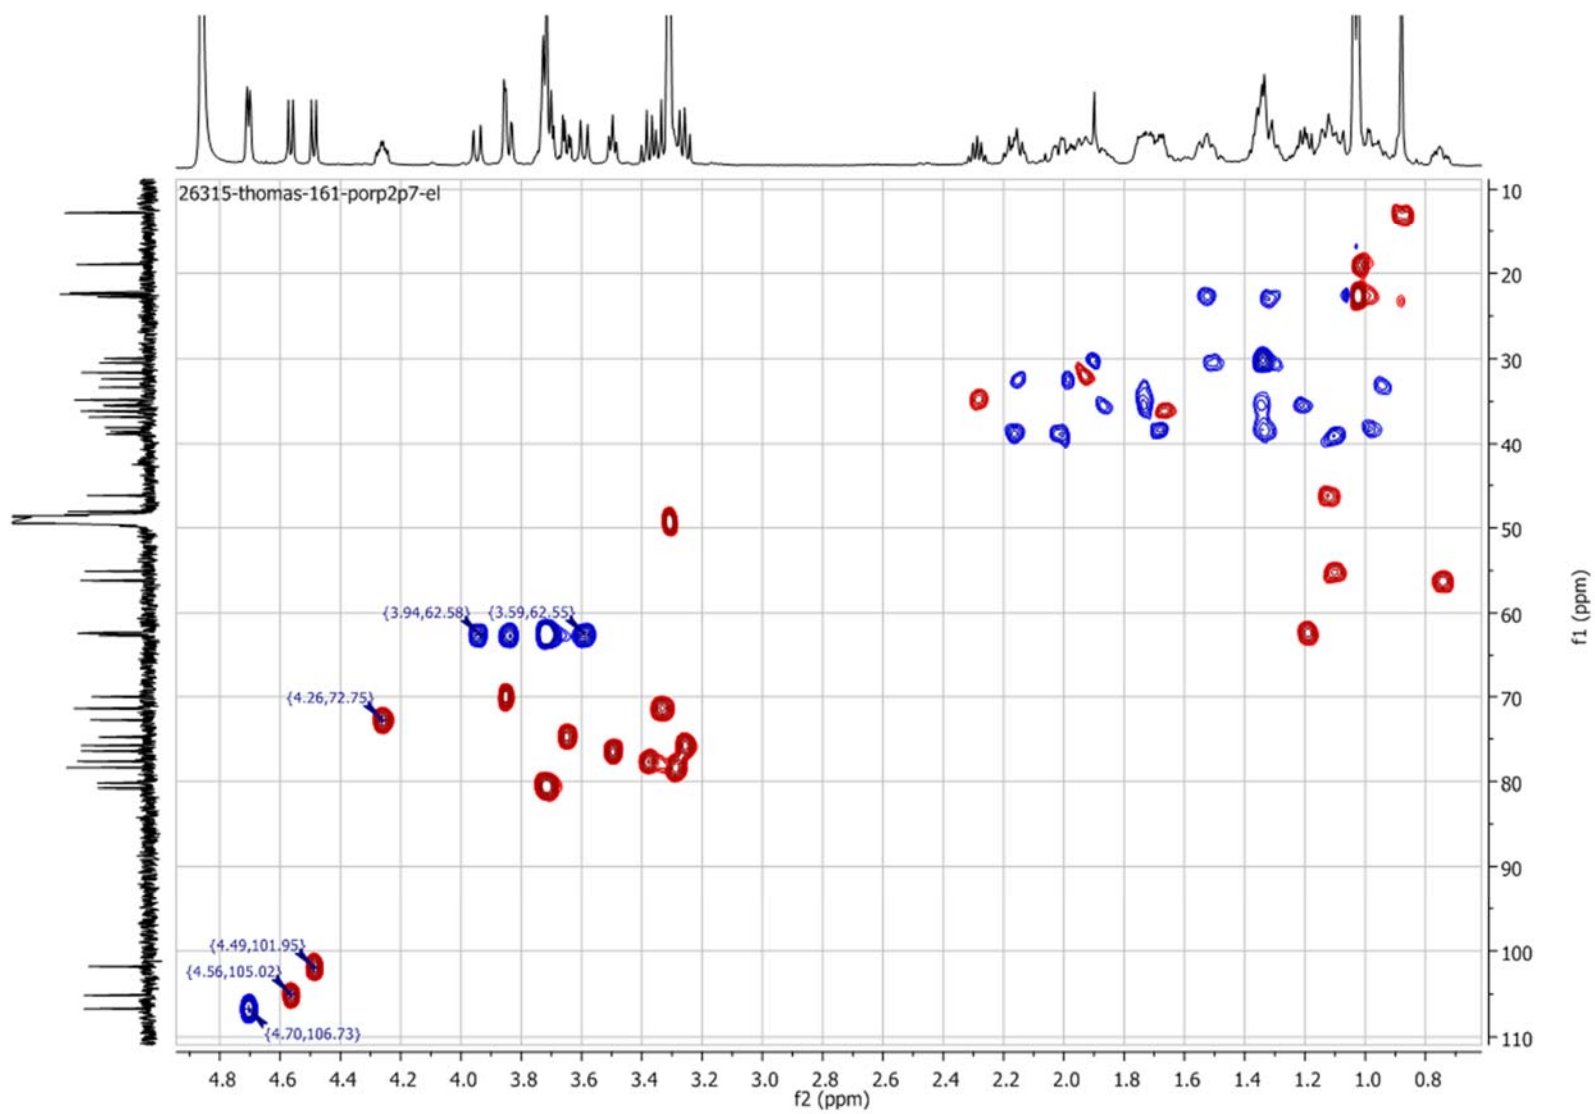

Figure S7. HSQC NMR spectrum of **1** at 500 MHz in CD<sub>3</sub>OD

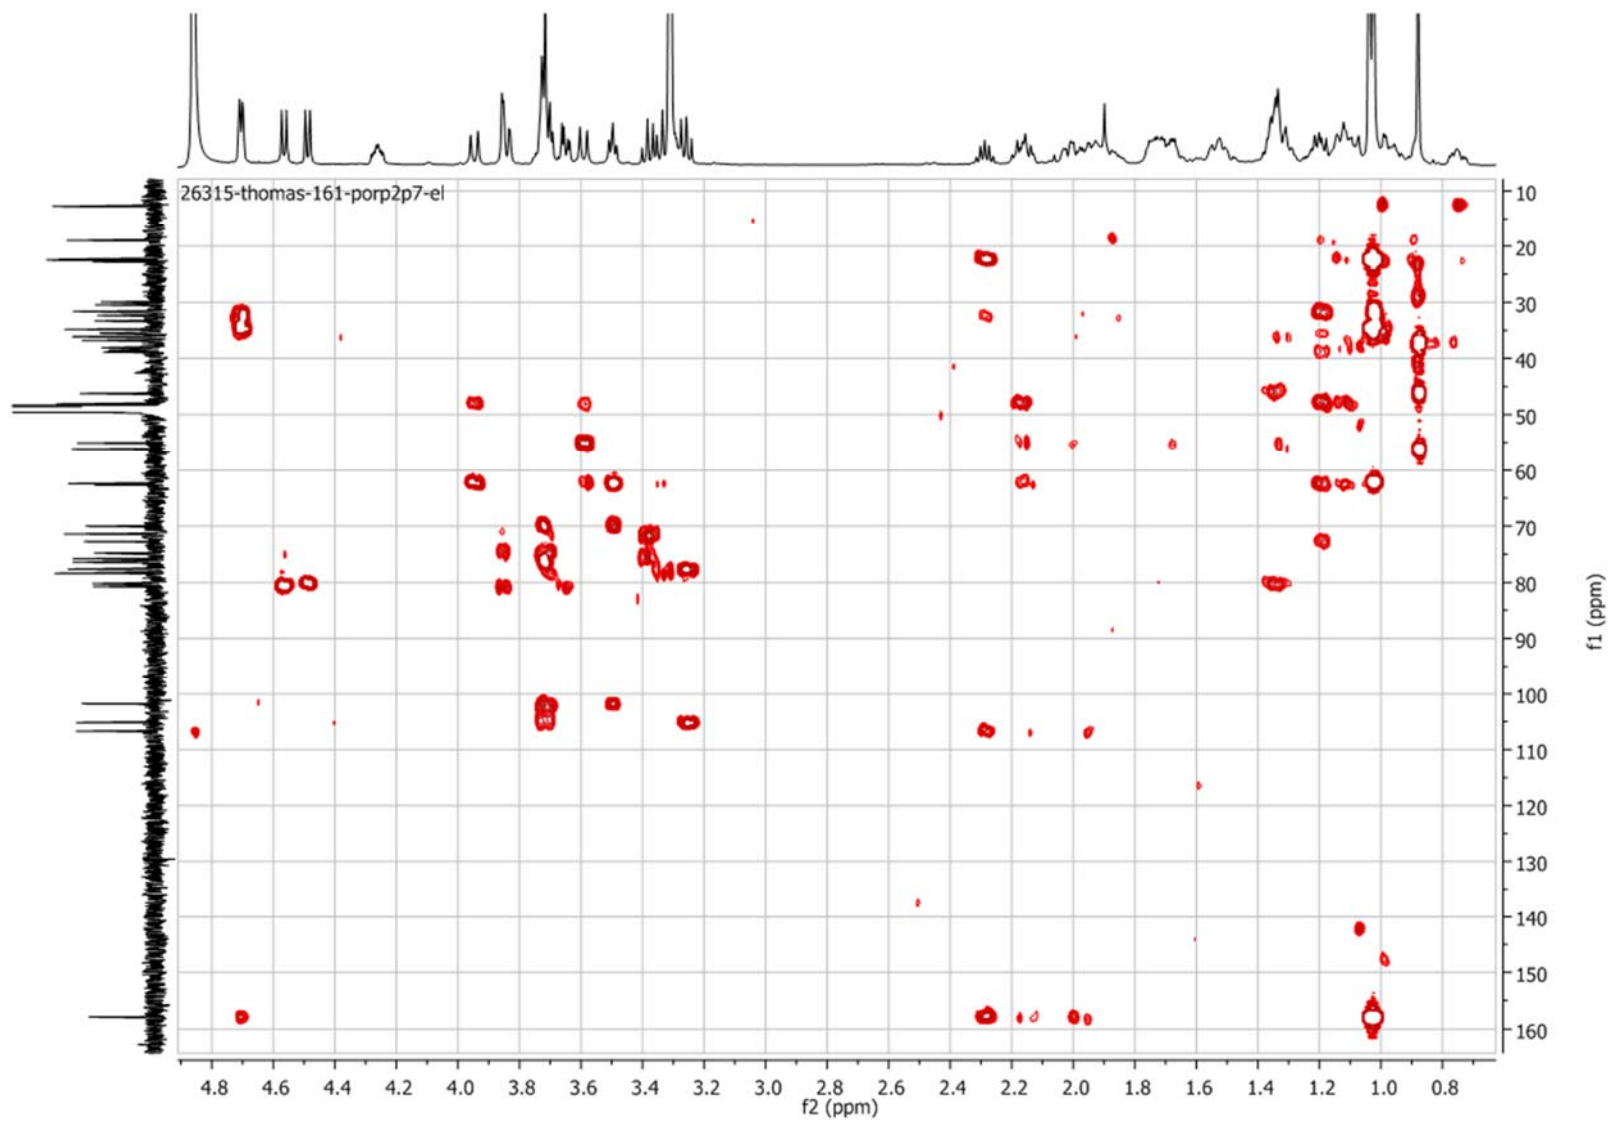

Figure S8. HMBC spectrum of 1 at 500 MHz in CD<sub>3</sub>OD

| Compound Formula                                | Name               | RT    | Algorithm           |
|-------------------------------------------------|--------------------|-------|---------------------|
| C <sub>41</sub> H <sub>70</sub> O <sub>13</sub> | Poecillastroside B | 6.581 | Spectrum Extraction |

6  
x10  
MS Spectrum

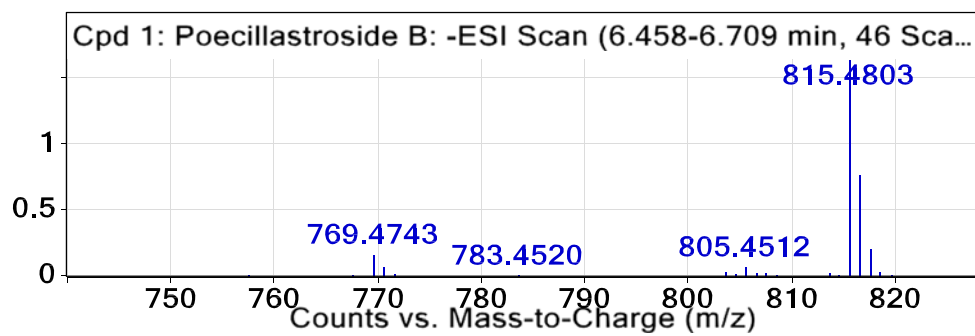

Figure S9. (-)-HRESIMS analysis of 2.

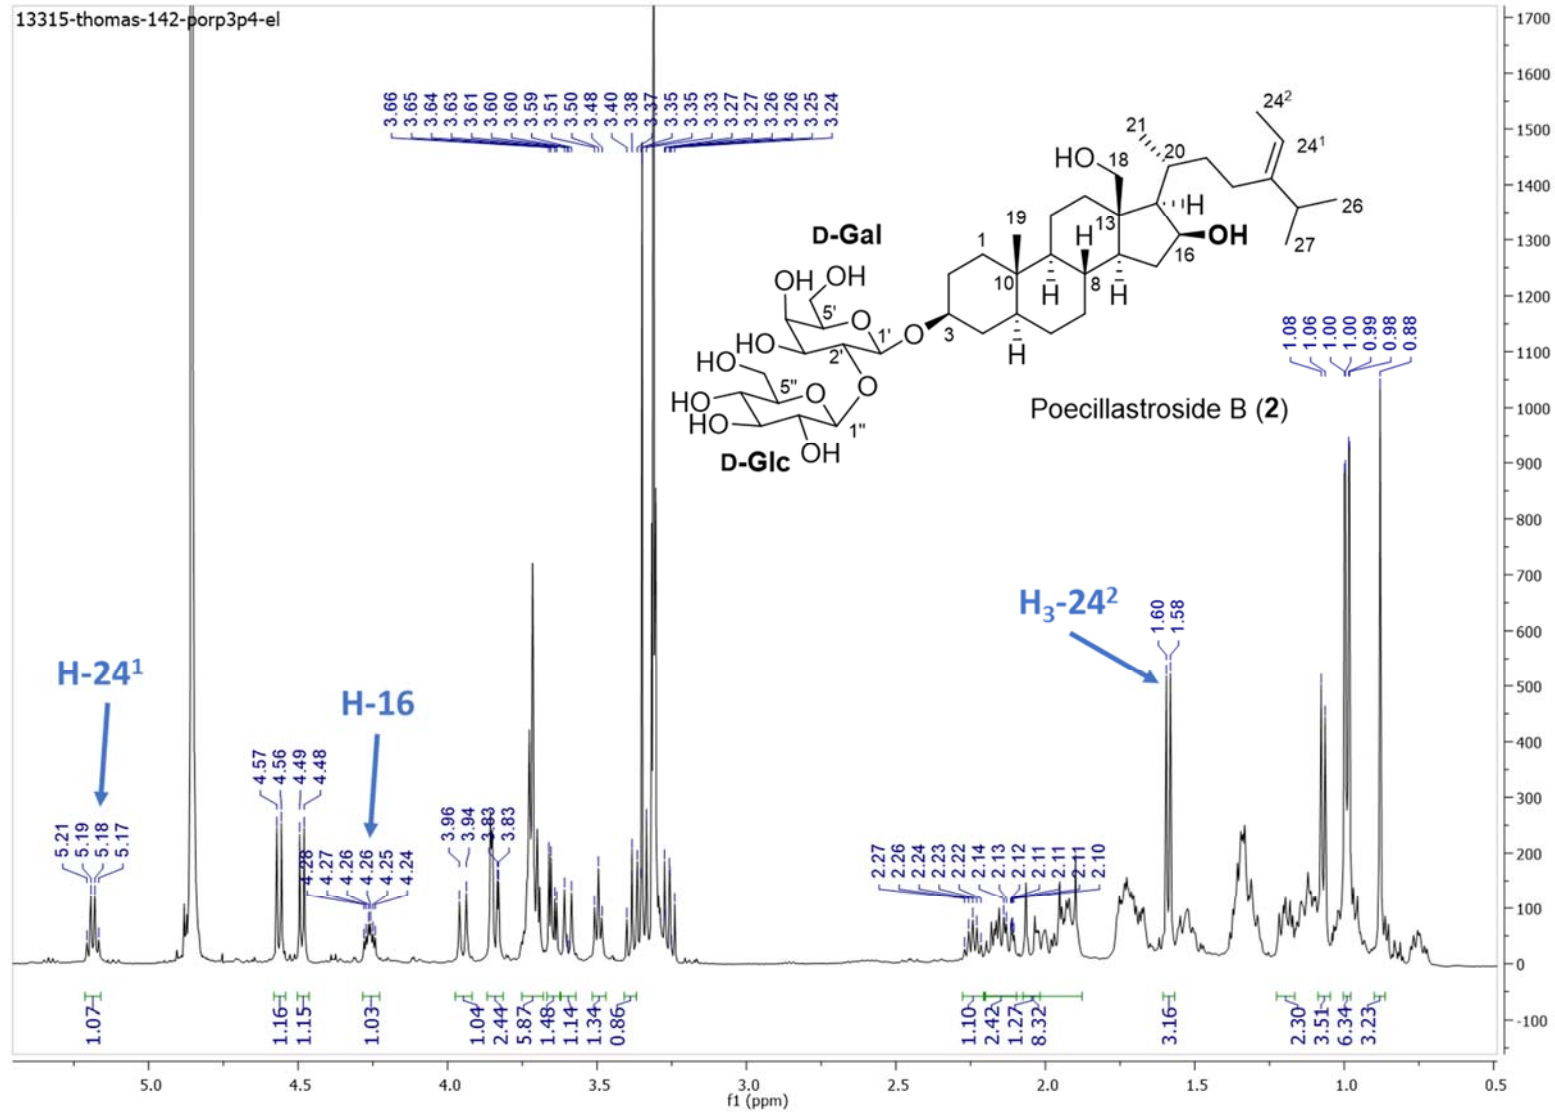

Figure S10. <sup>1</sup>H NMR spectrum of 2 at 500 MHz in CD<sub>3</sub>OD

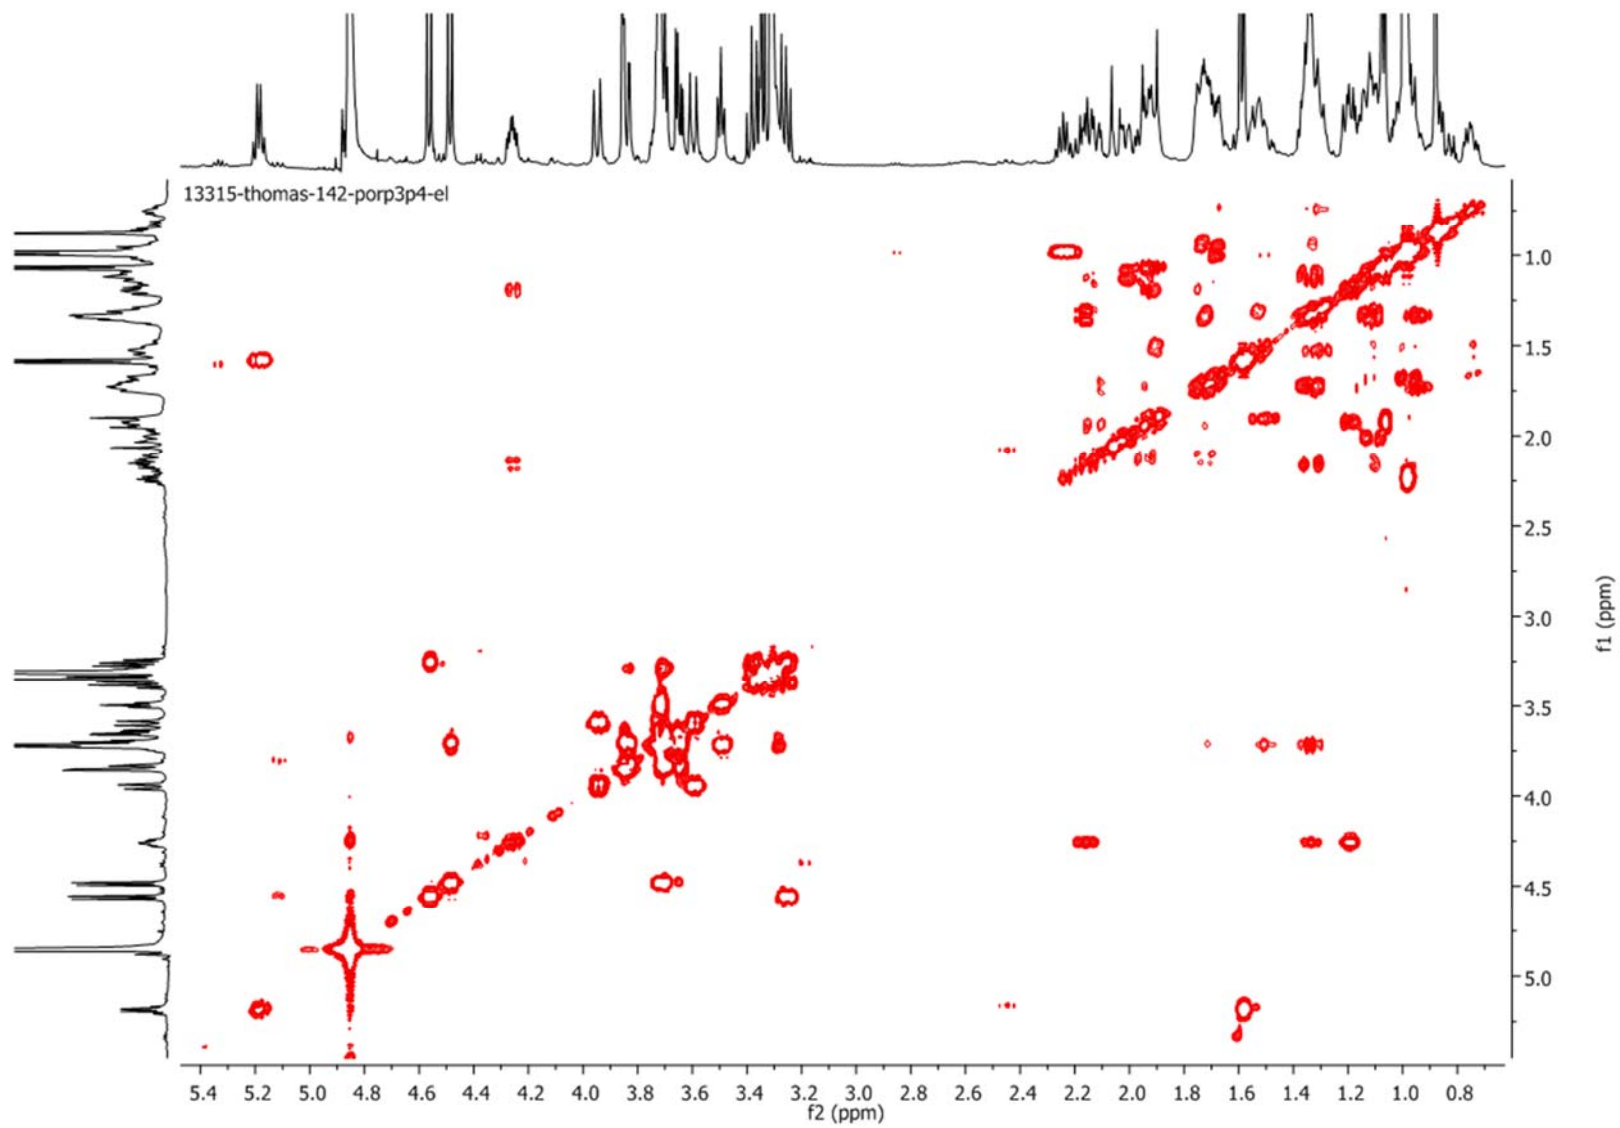

Figure S11. COSY NMR spectrum of **2** at 500 MHz in CD<sub>3</sub>OD

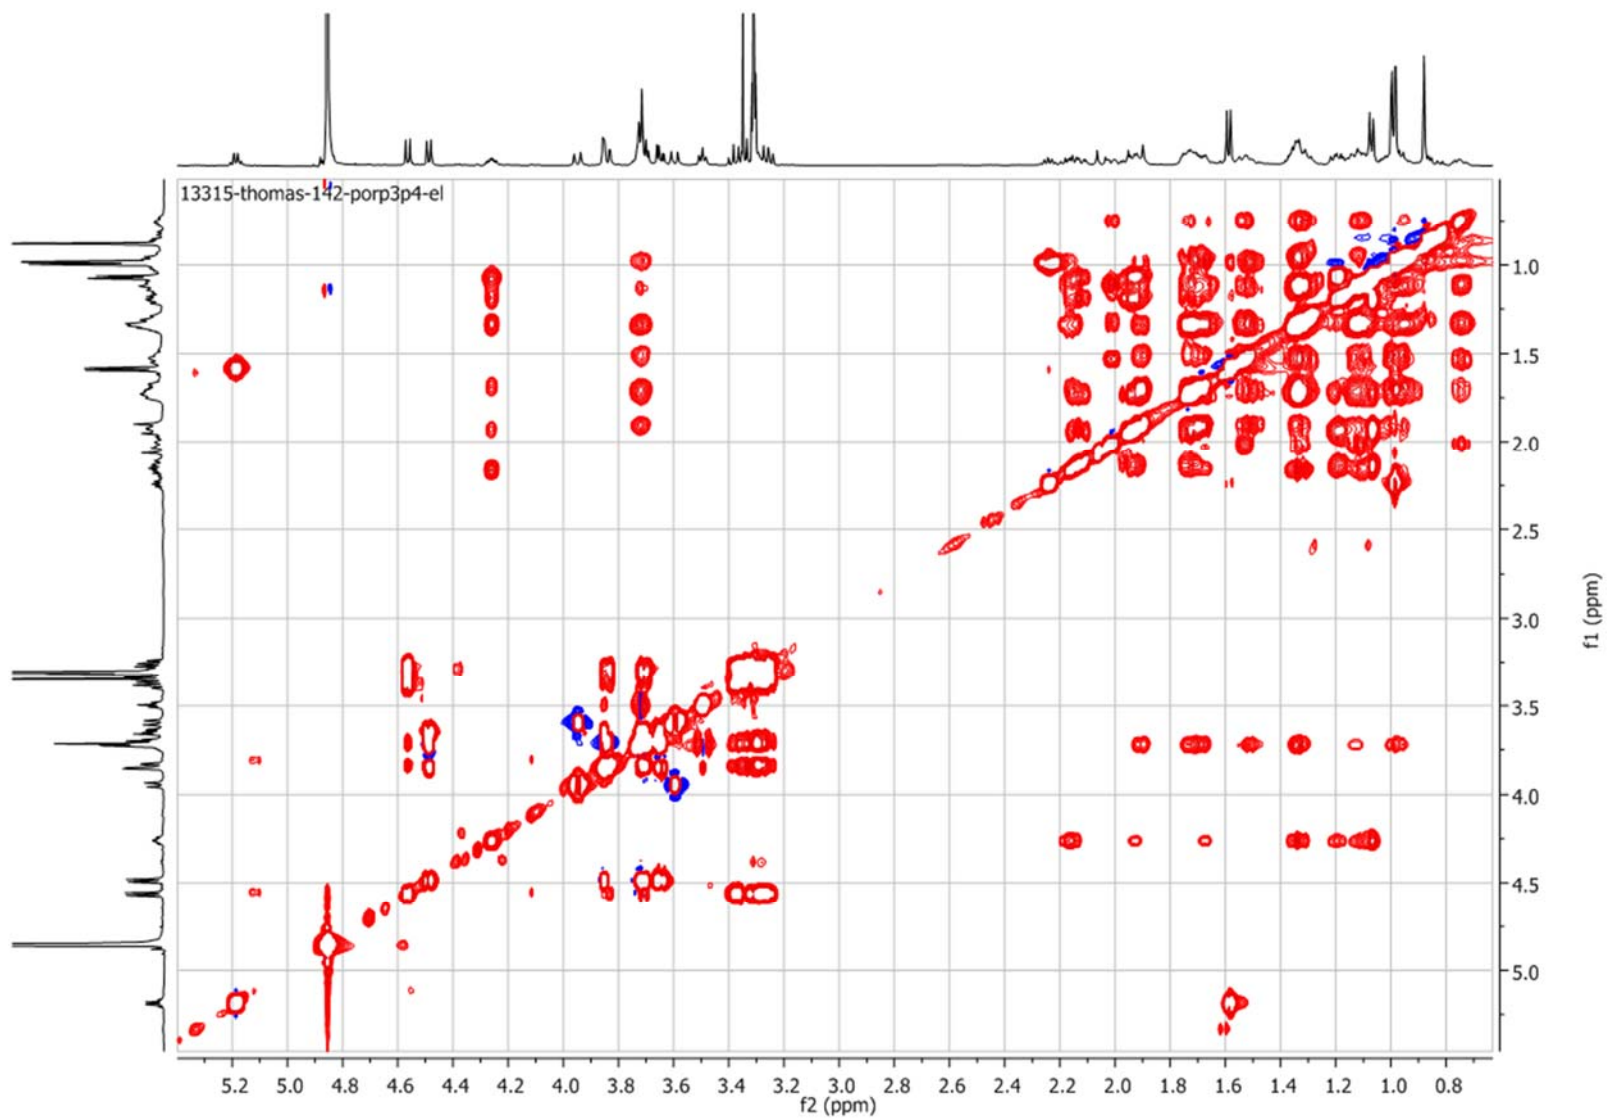

Figure S12. TOCSY NMR spectrum of **2** at 500 MHz in CD<sub>3</sub>OD

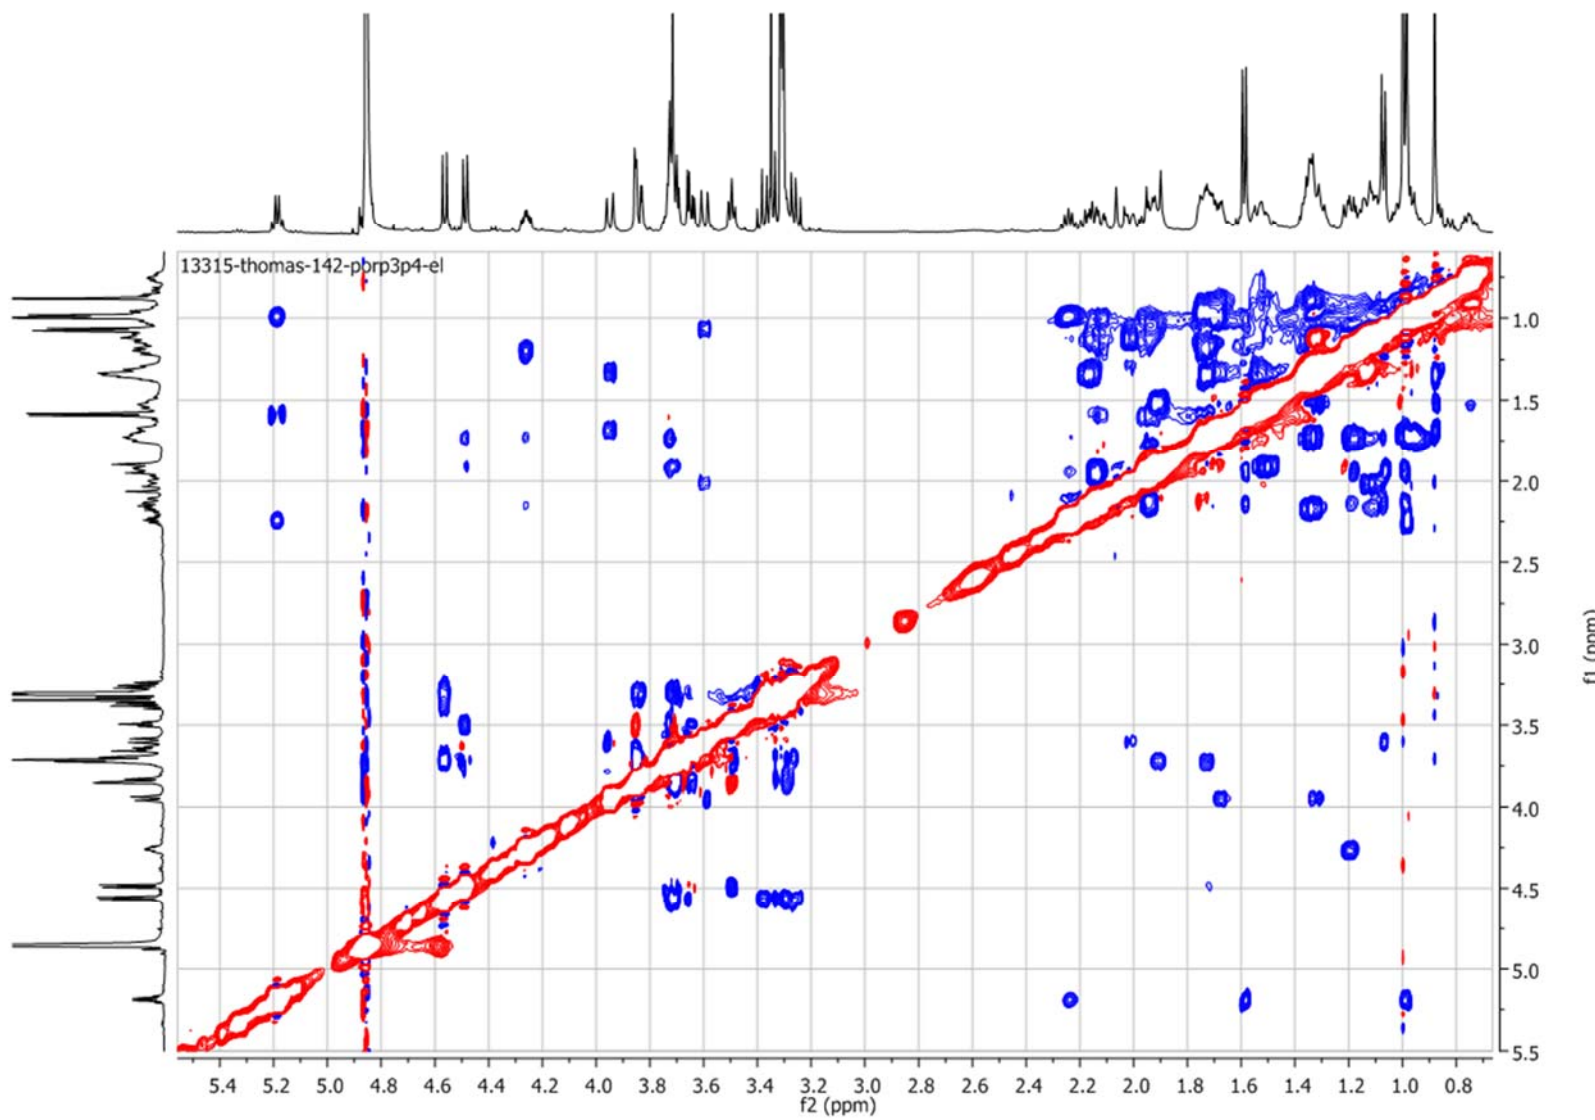

Figure S13. NOESY NMR spectrum of **2** at 500 MHz in CD<sub>3</sub>OD



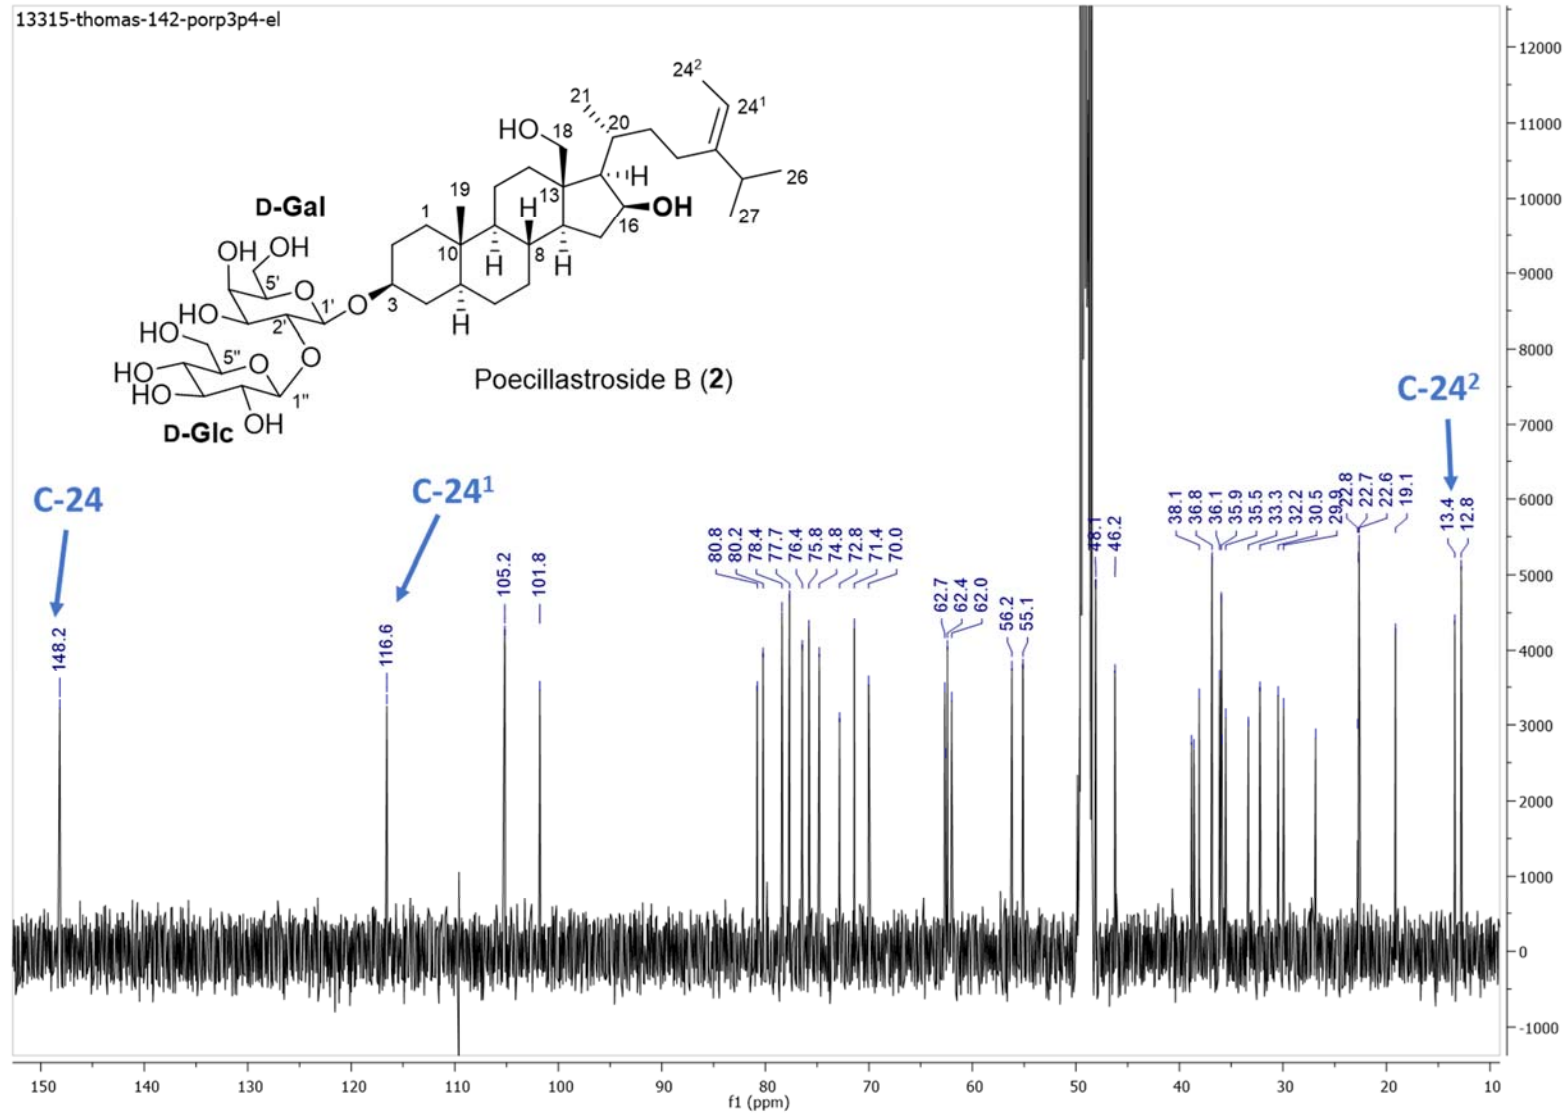

Figure S14.  $^{13}\text{C}$  NMR spectrum of **2** at 125 MHz in  $\text{CD}_3\text{OD}$

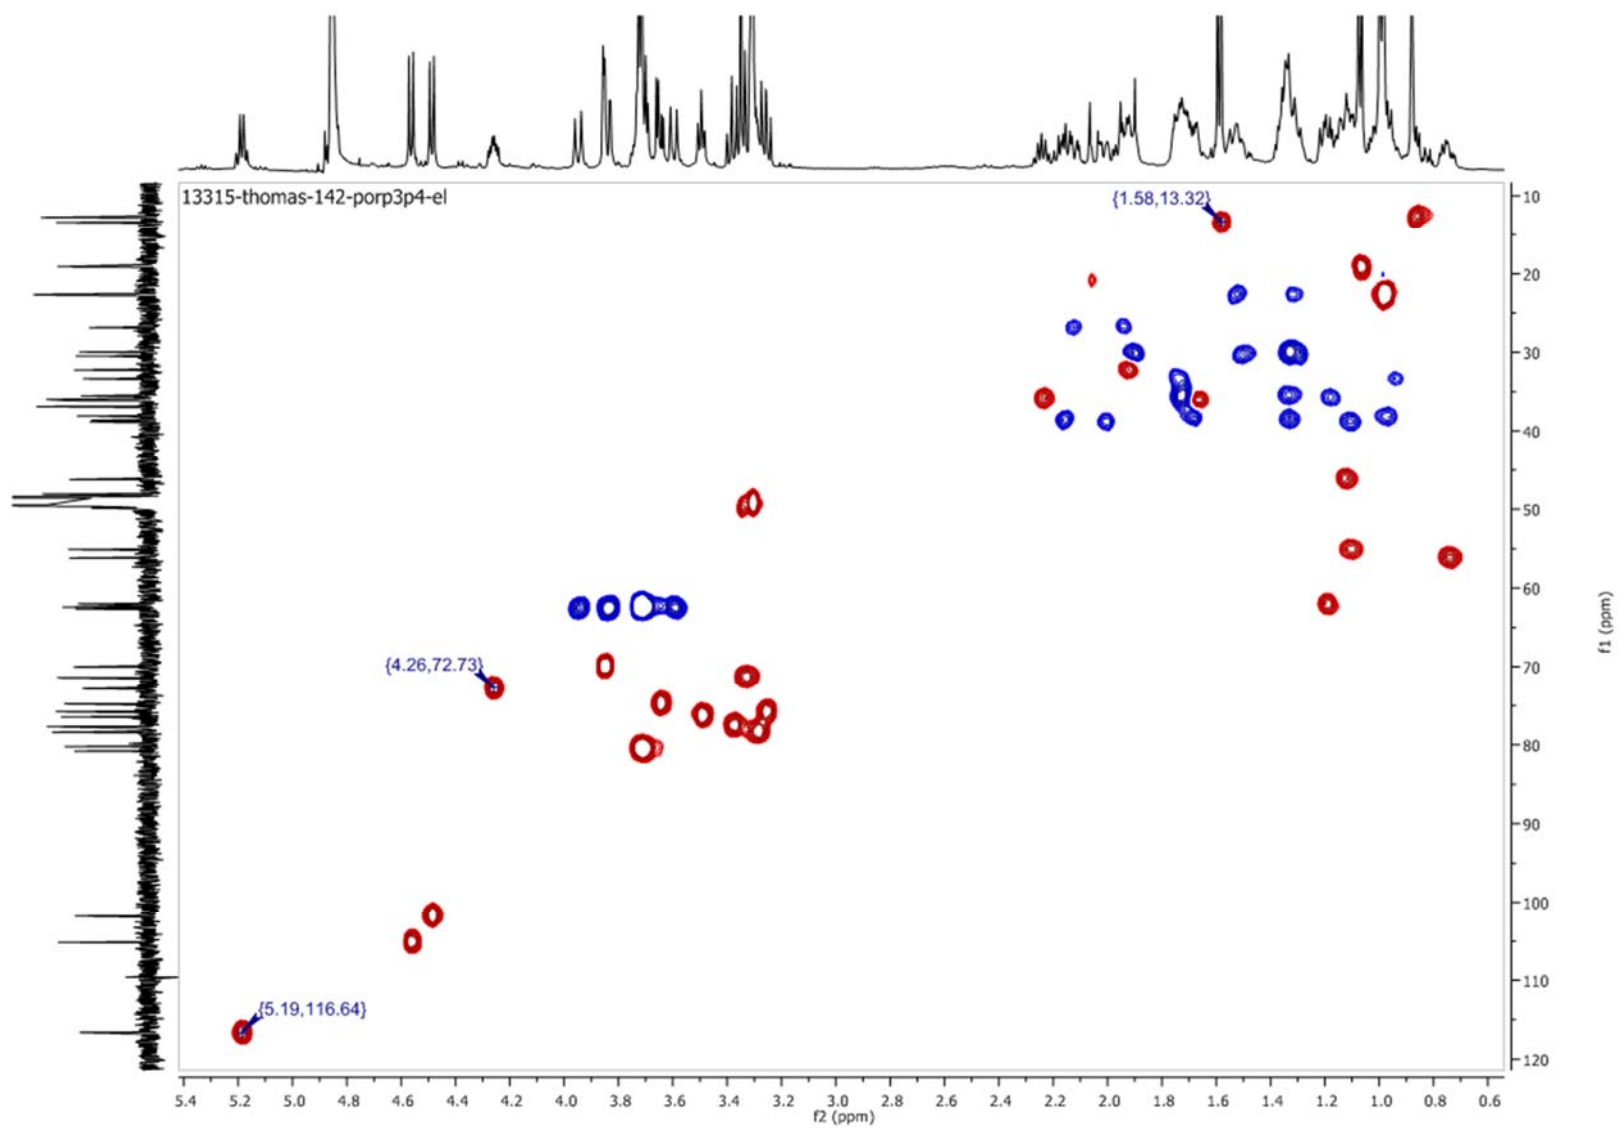

Figure S15. HSQC NMR spectrum of **2** at 500 MHz in CD<sub>3</sub>OD

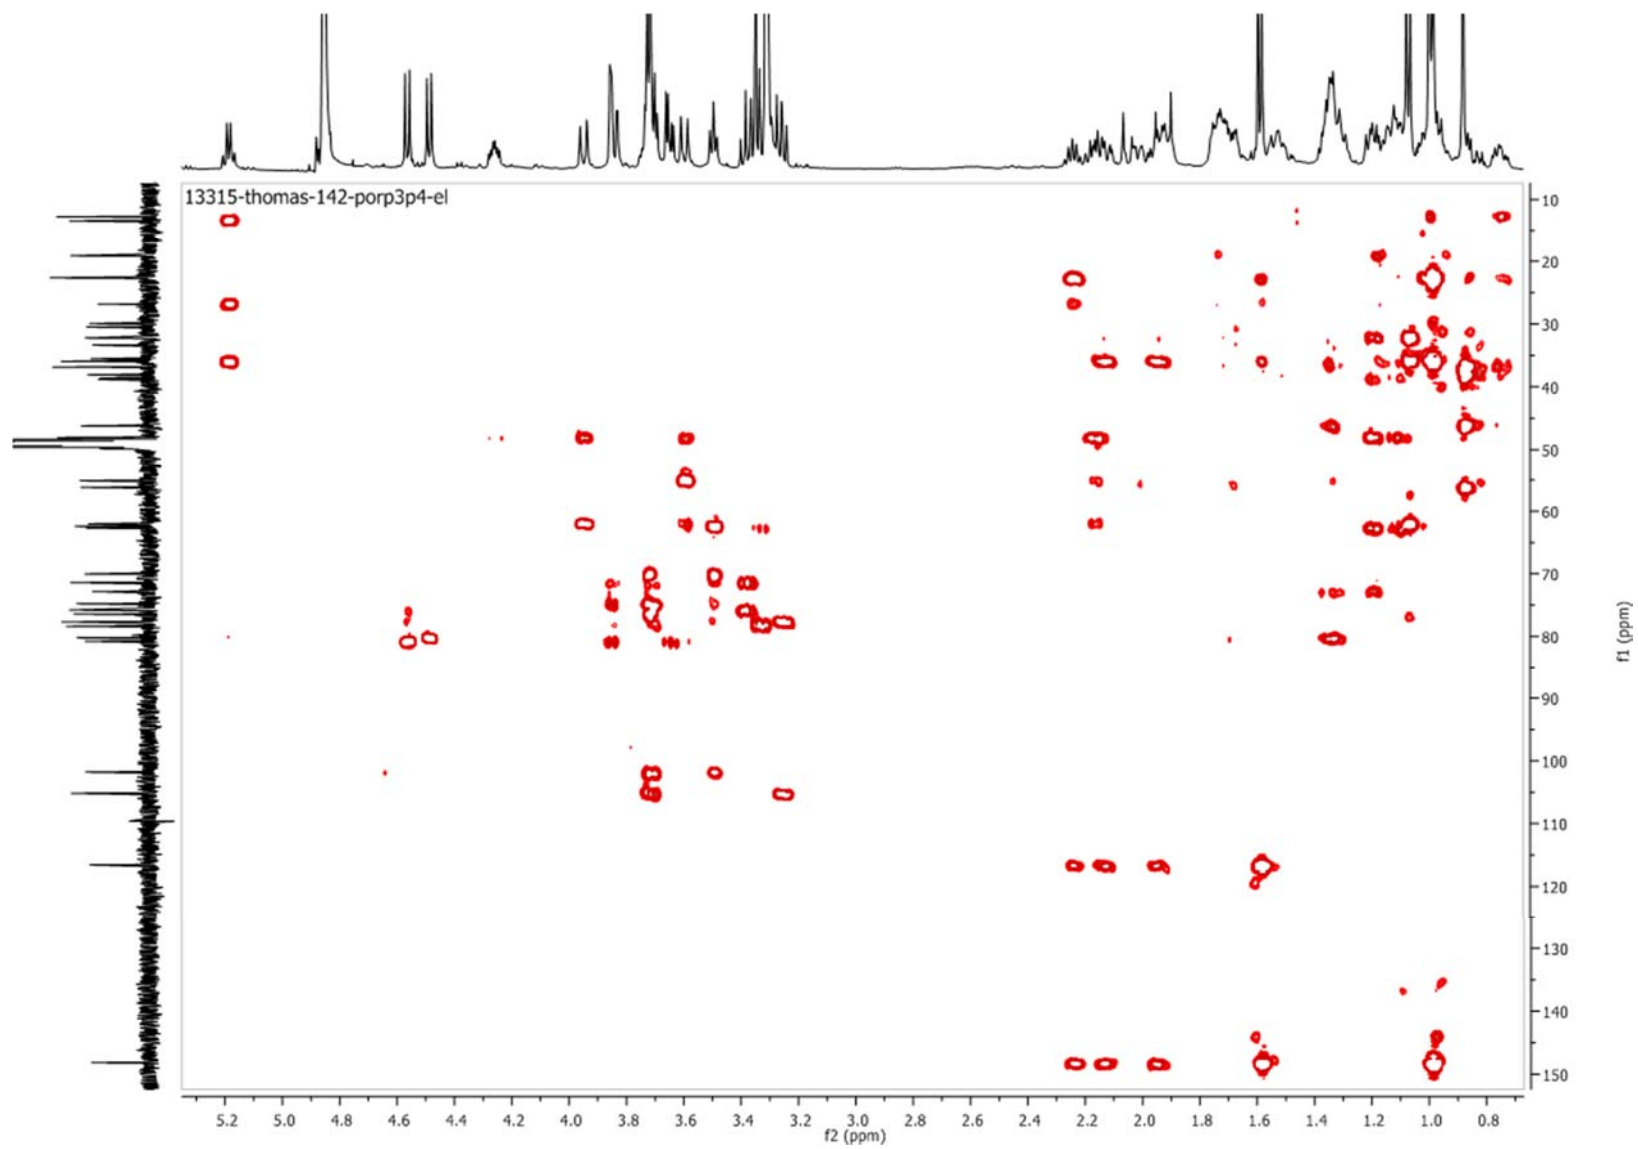

Figure S16. HMBC spectrum of 2 at 500 MHz in CD<sub>3</sub>OD

| Compound Formula                                | Name               | RT    | Algorithm           |
|-------------------------------------------------|--------------------|-------|---------------------|
| C <sub>41</sub> H <sub>70</sub> O <sub>13</sub> | Poecillastroside C | 6.559 | Spectrum Extraction |

6  
x10  
MS Spectrum

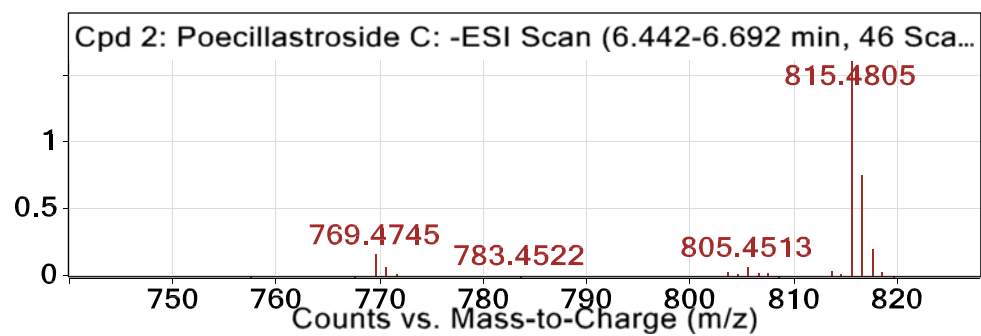

Figure S17. (-)-HRESIMS analysis of 3.

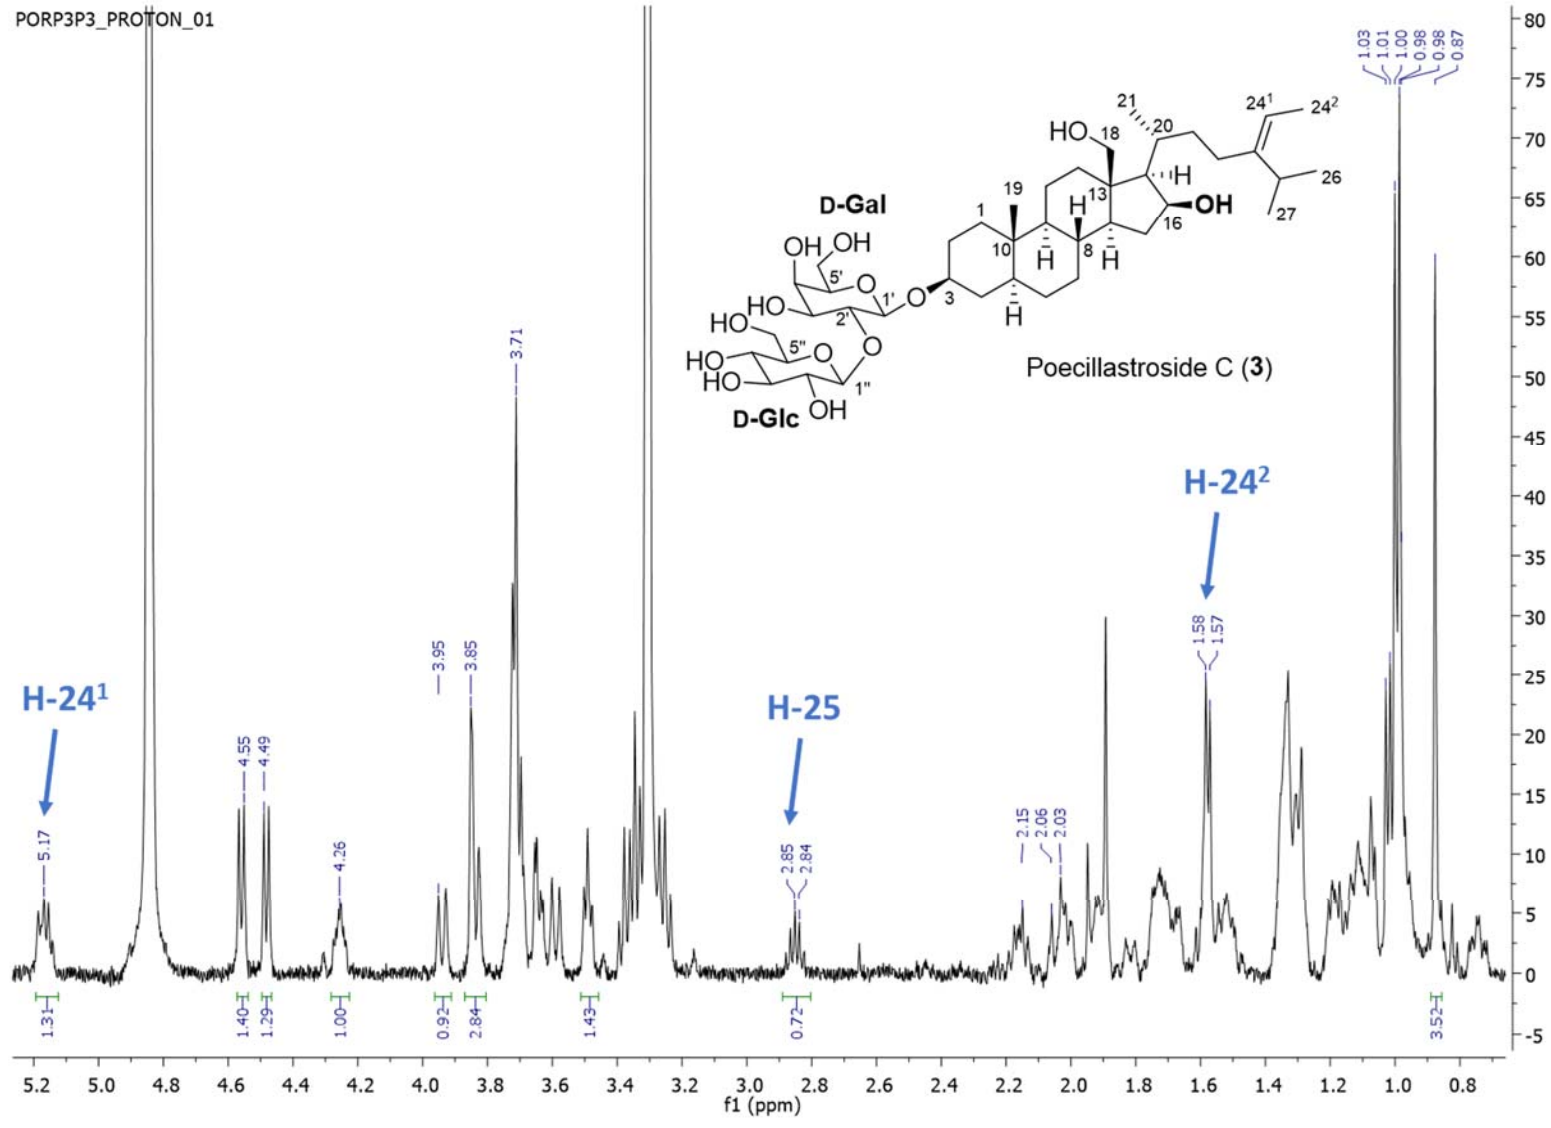

Figure S18. <sup>1</sup>H NMR spectrum of **3** at 500 MHz in CD<sub>3</sub>OD

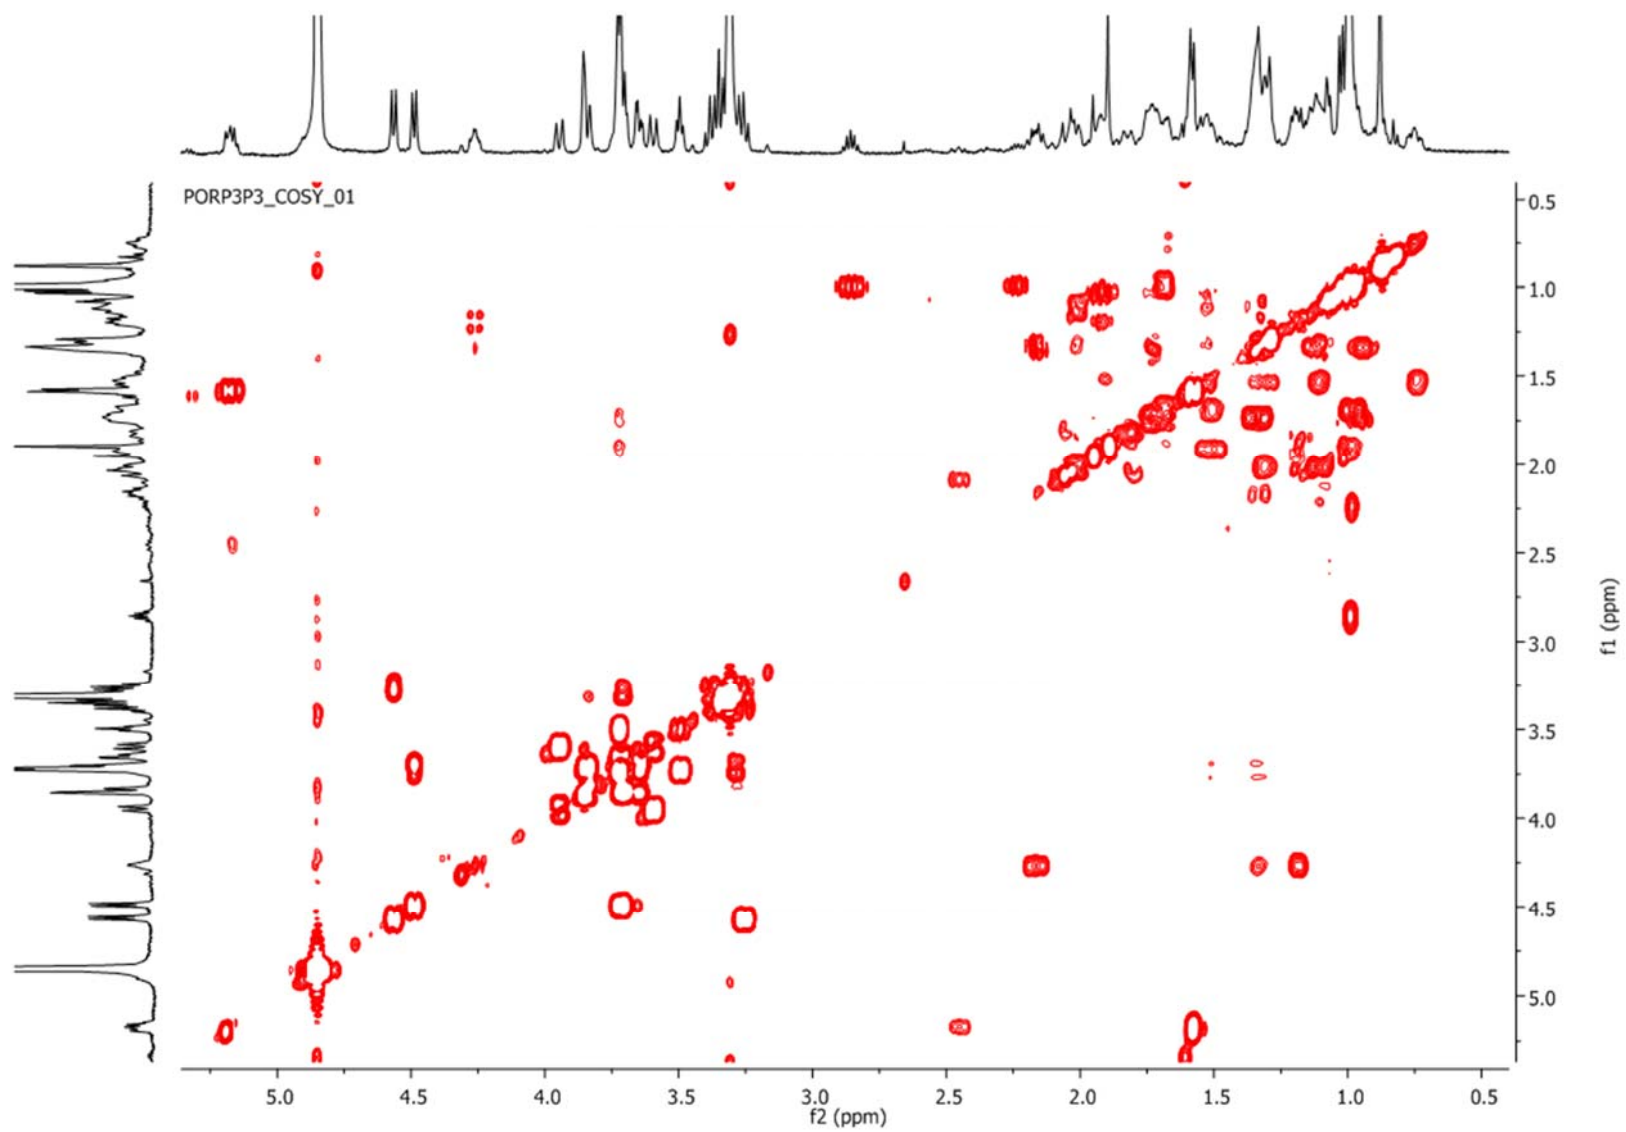

Figure S19. COSY NMR spectrum of **3** at 500 MHz in CD<sub>3</sub>OD

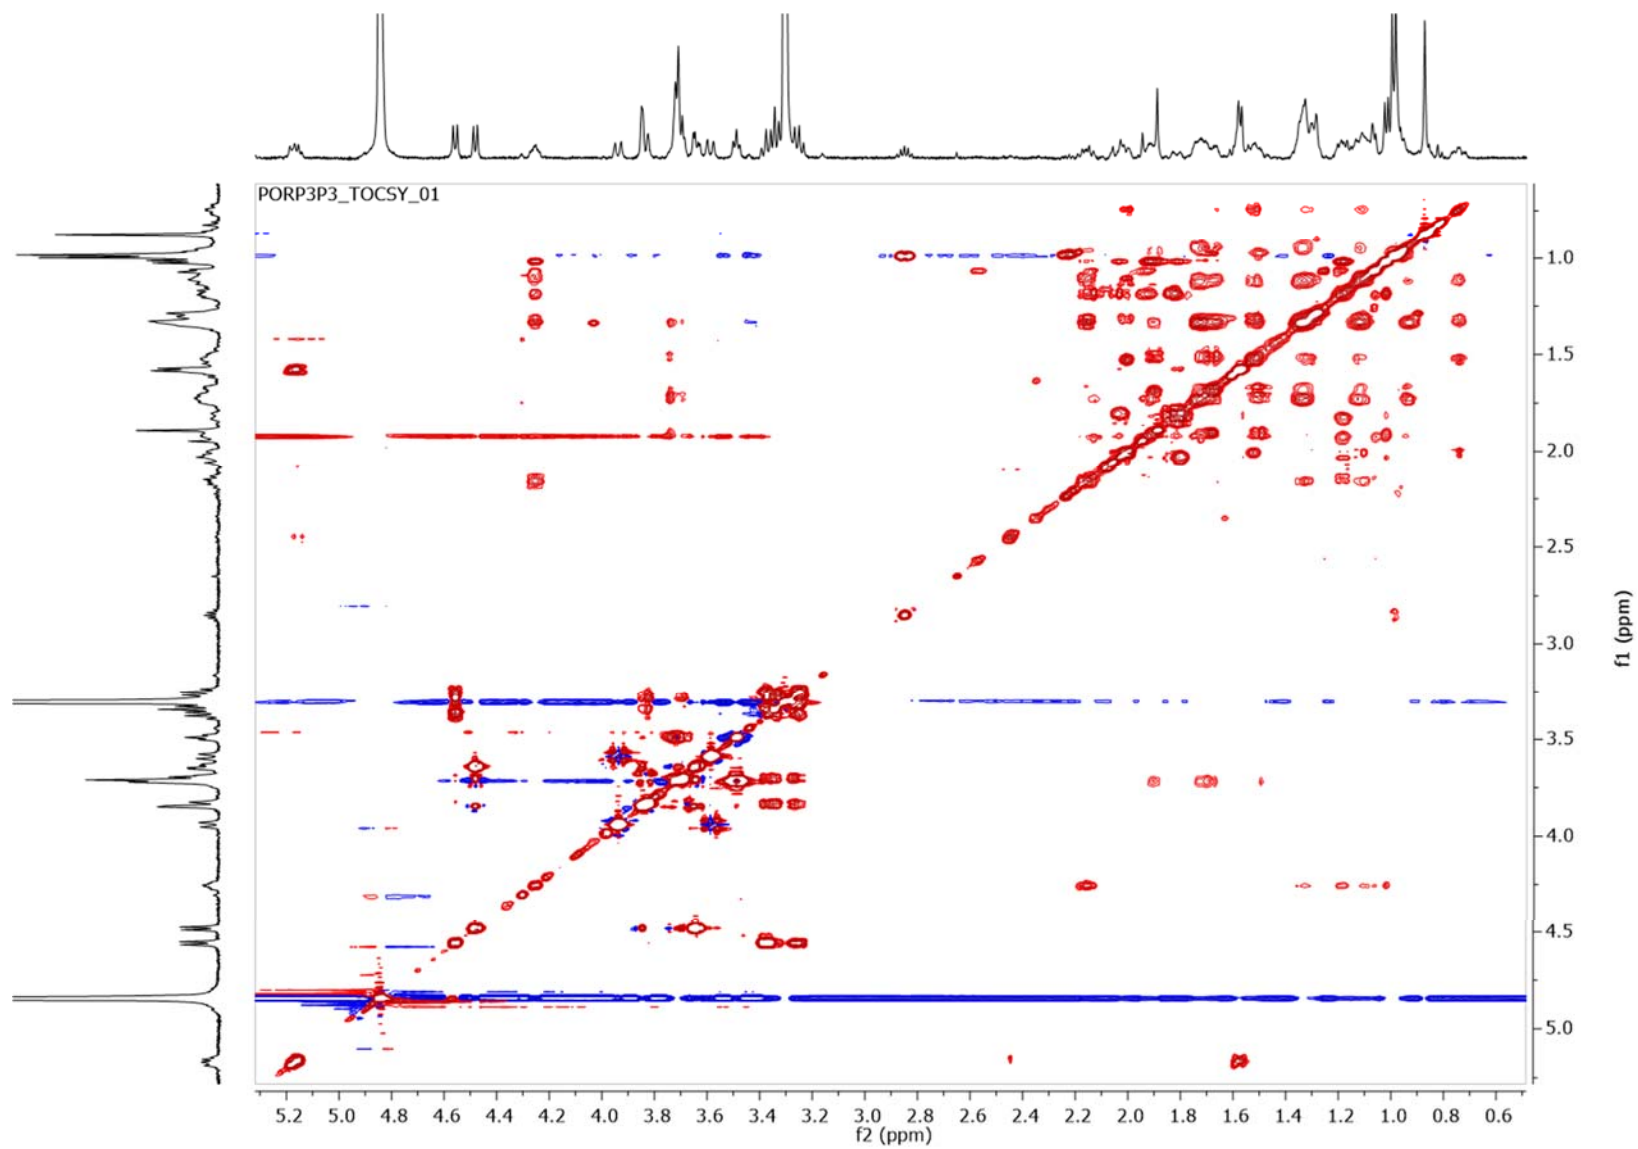

Figure S20. TOCSY NMR spectrum of 3 at 500 MHz in CD<sub>3</sub>OD

KC\_PORP3P3\_CARBON\_01

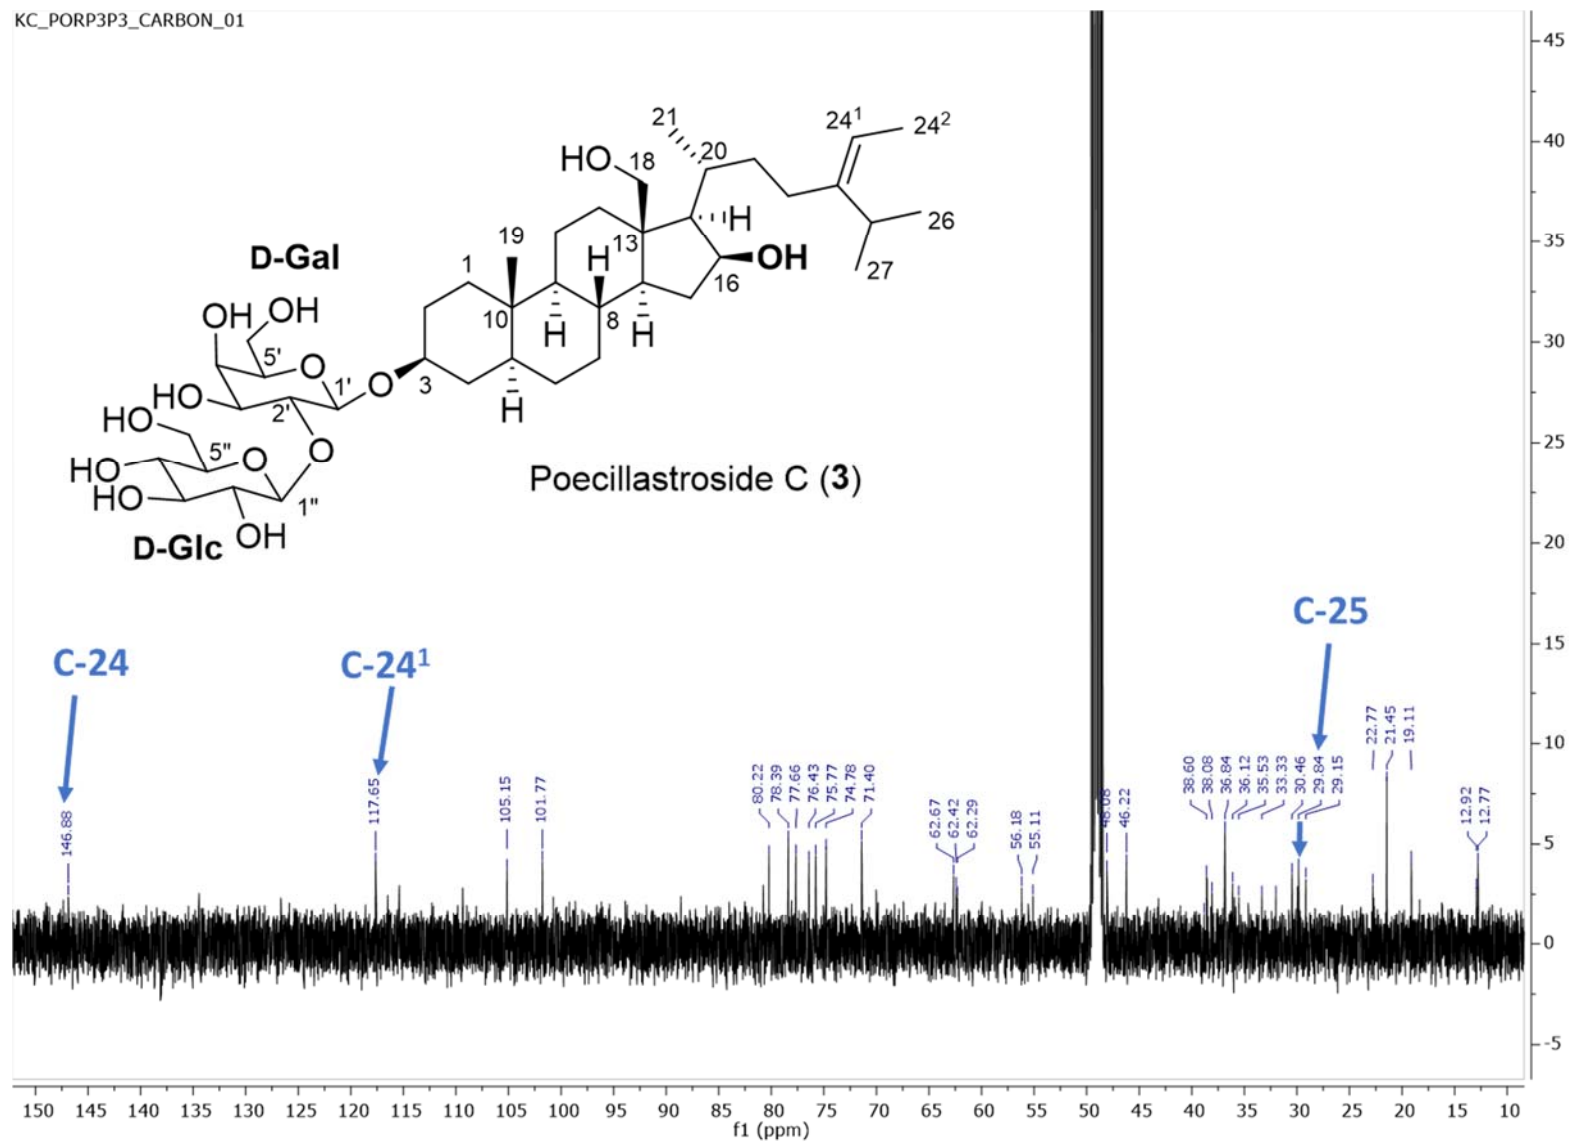

Figure S21. <sup>13</sup>C NMR spectrum of 3 at 500 MHz in CD<sub>3</sub>OD



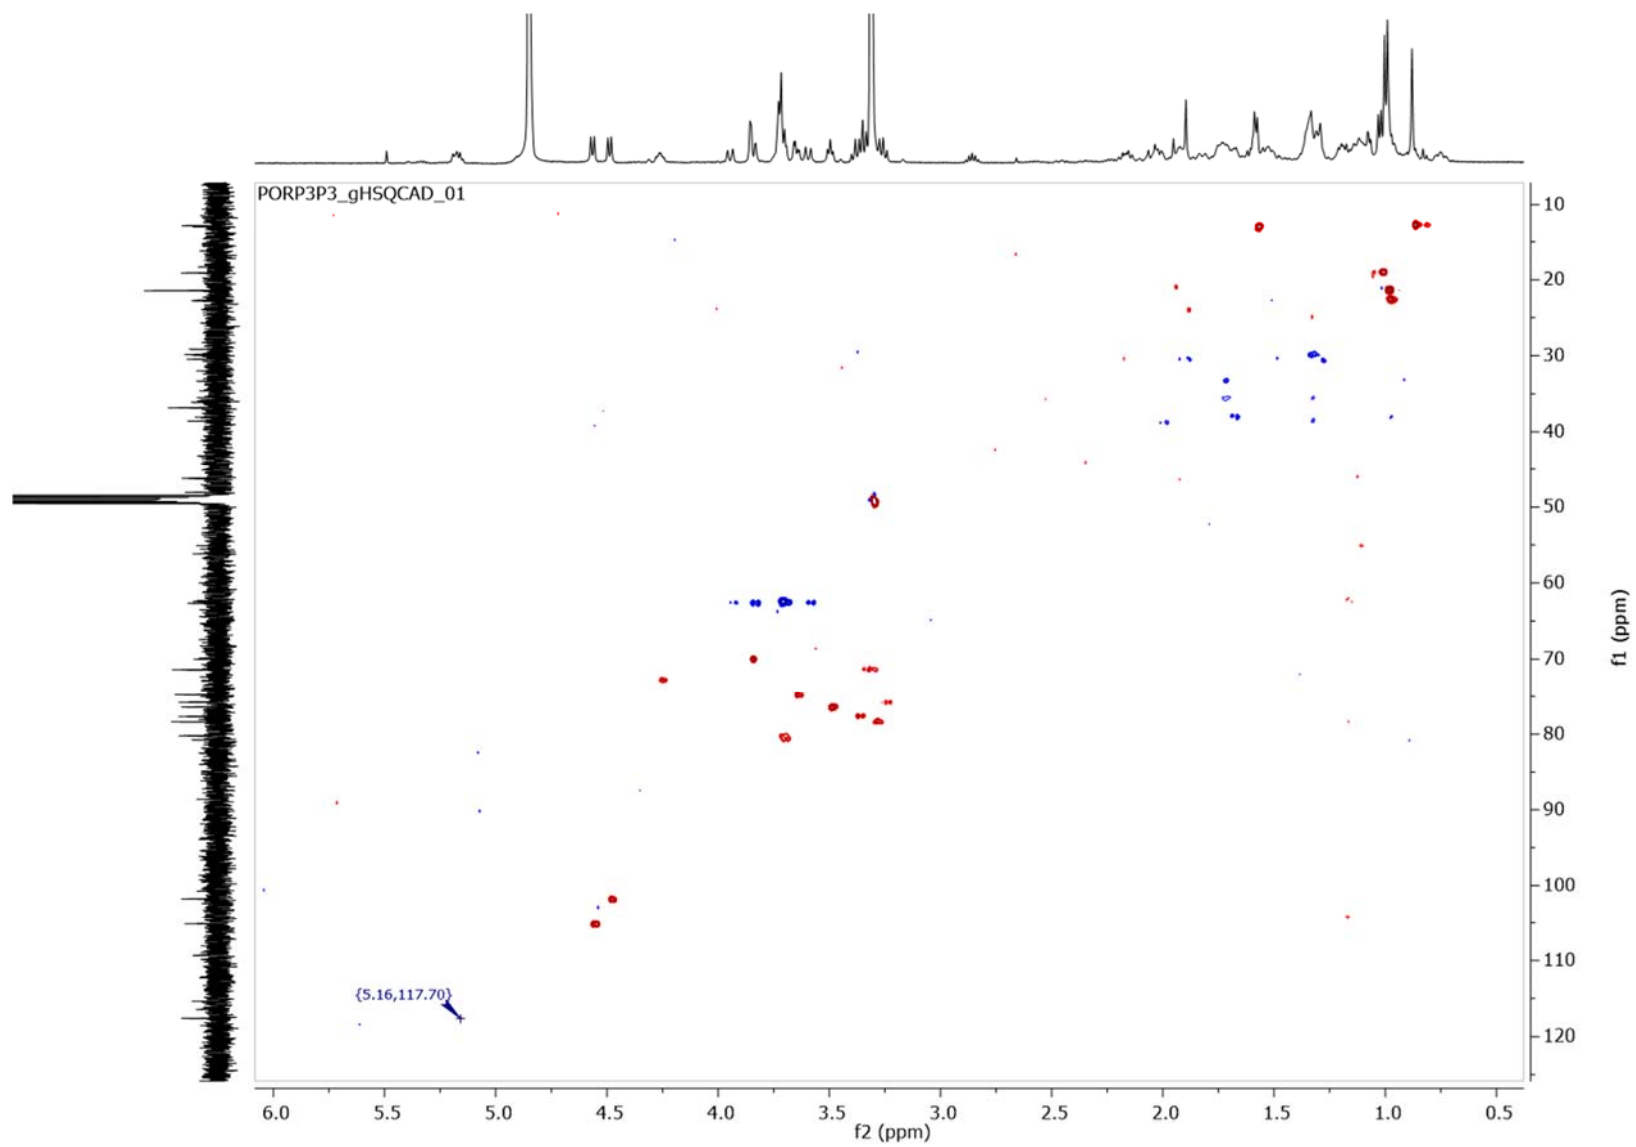

Figure S22. HSQC NMR spectrum of **3** at 500 MHz in  $\text{CD}_3\text{OD}$

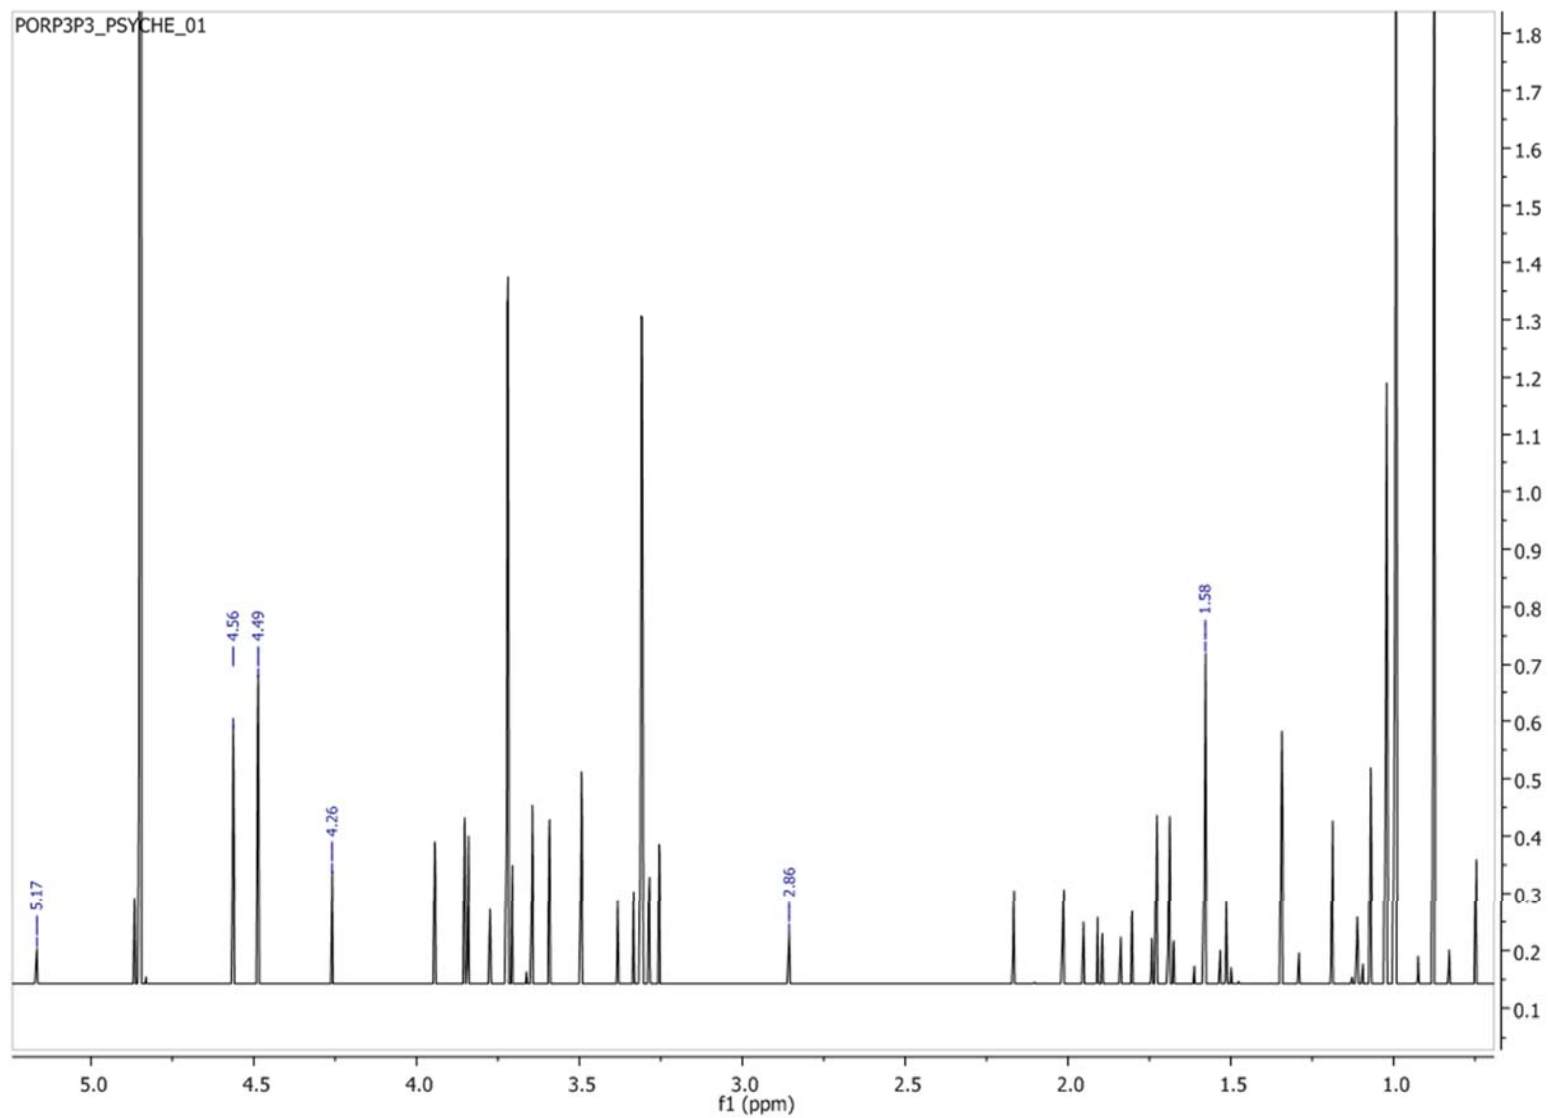

Figure S23. PSYCHE\_1D NMR spectrum of **3** at 500 MHz in CD<sub>3</sub>OD

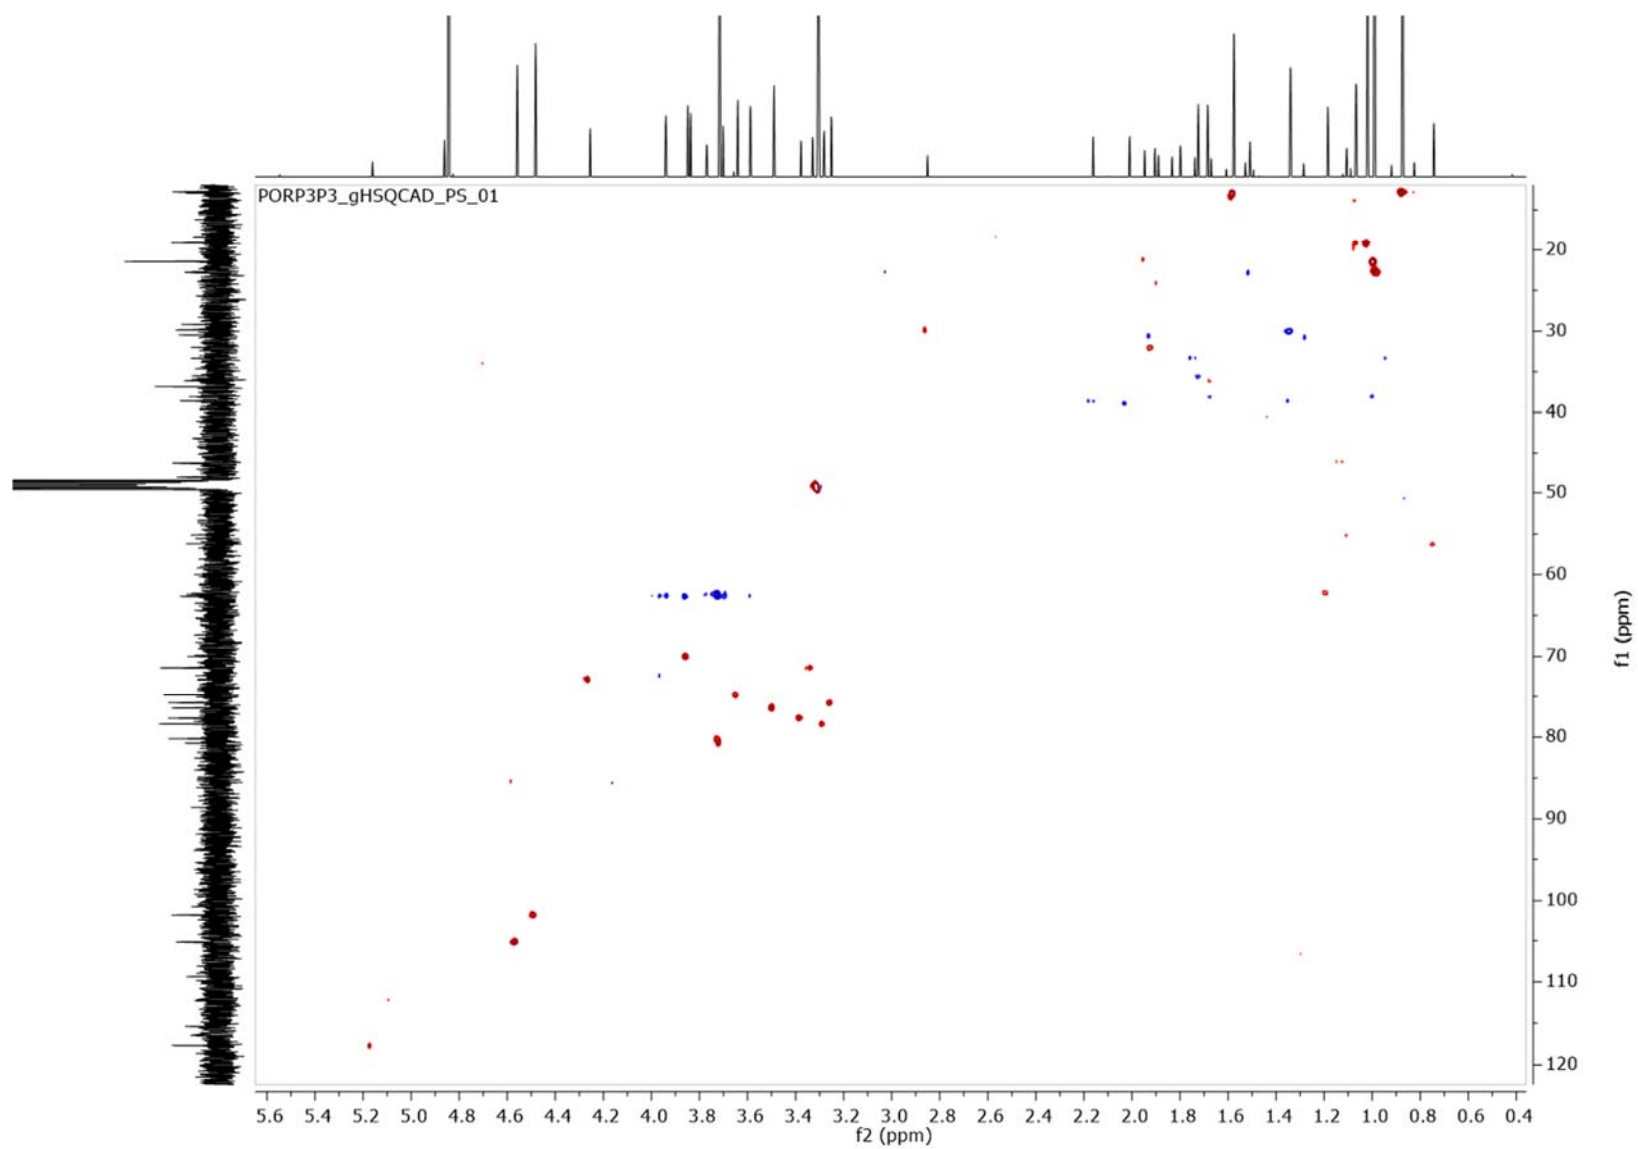

Figure S24. PS-HSQC NMR spectrum of **3** at 500 MHz in CD<sub>3</sub>OD

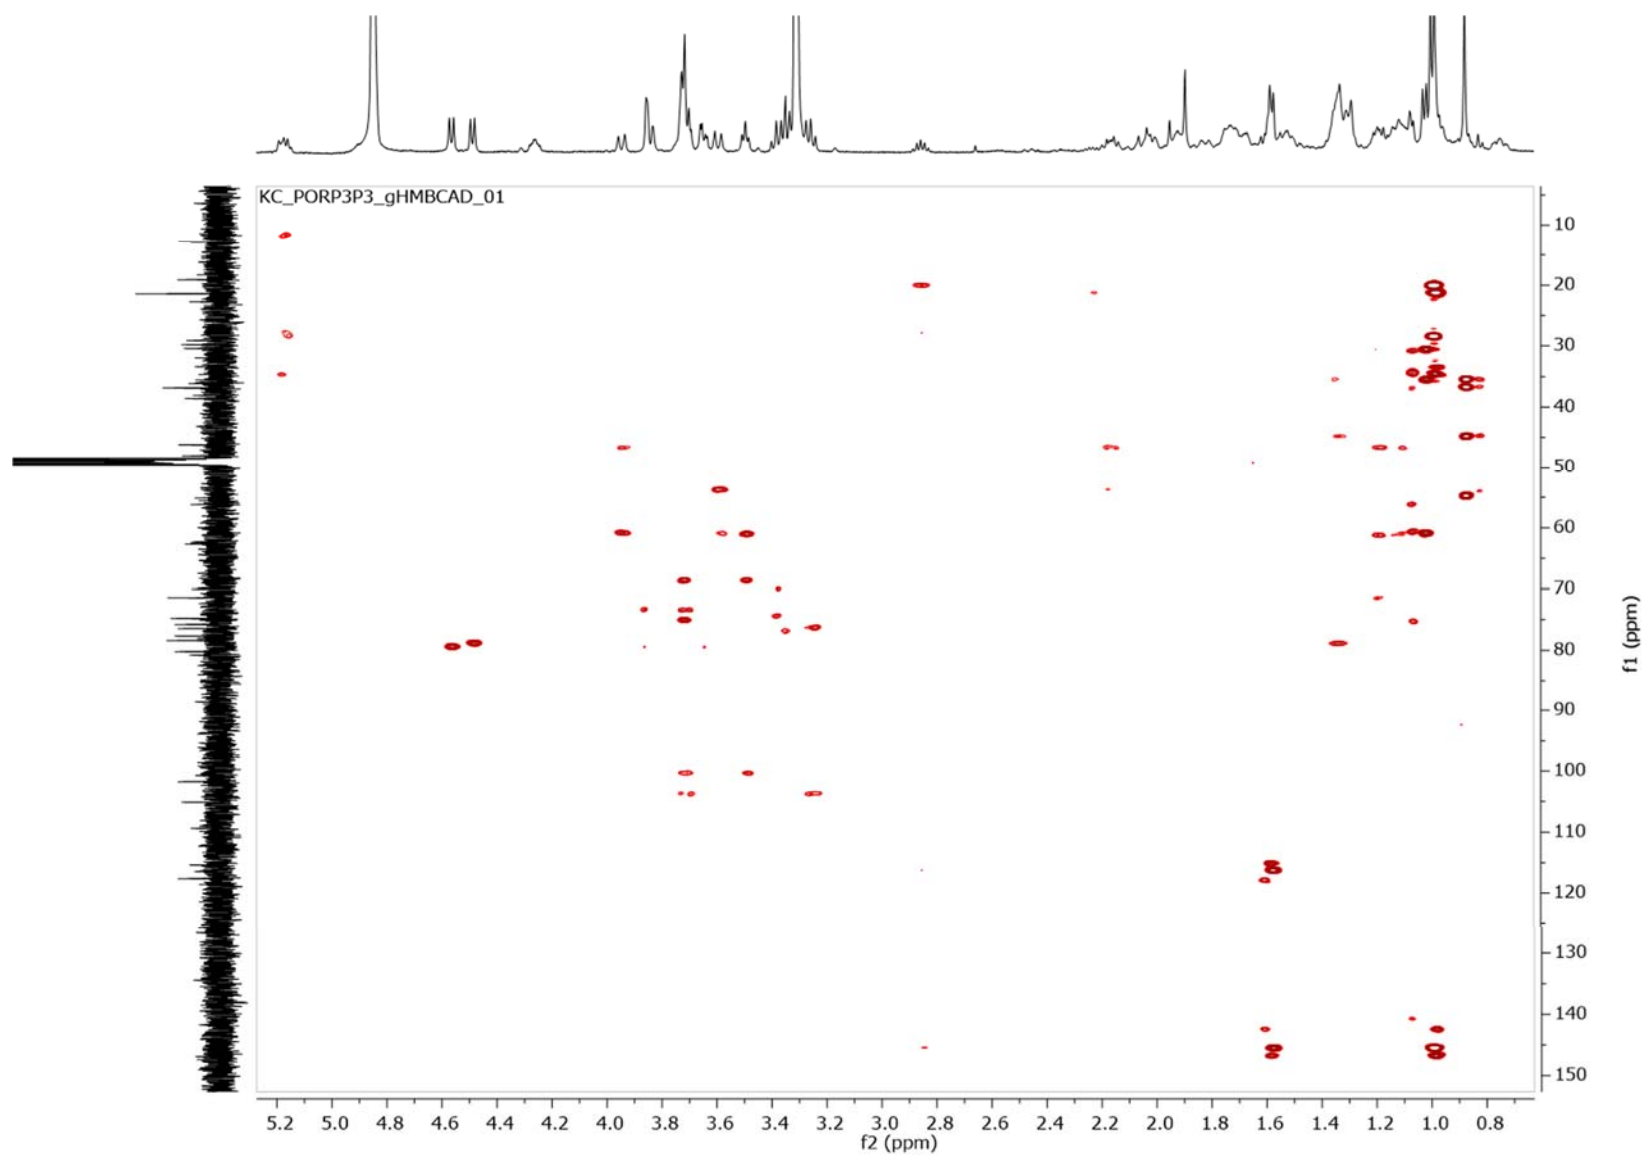

Figure S25. HMBC spectrum of **3** at 500 MHz in CD<sub>3</sub>OD

| Compound Formula                                | Name               | RT    | Algorithm           |
|-------------------------------------------------|--------------------|-------|---------------------|
| C <sub>41</sub> H <sub>68</sub> O <sub>13</sub> | Poecillastroside D | 7.049 | Spectrum Extraction |

5  
x10  
MS Spectrum

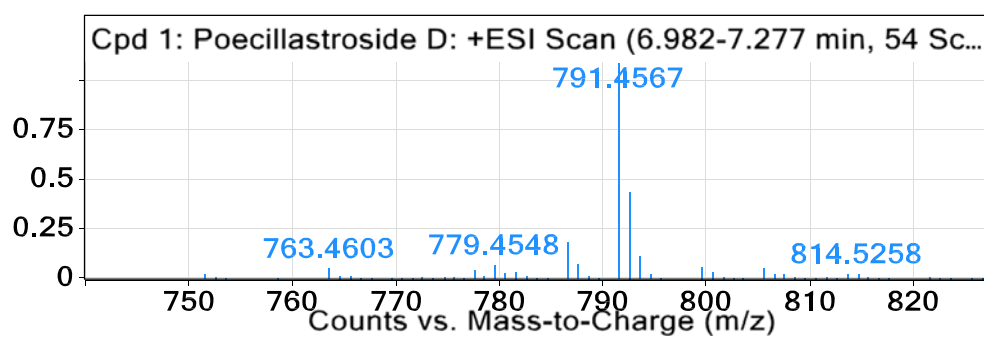

Figure S26. (+)-HRESIMS analysis of 4.

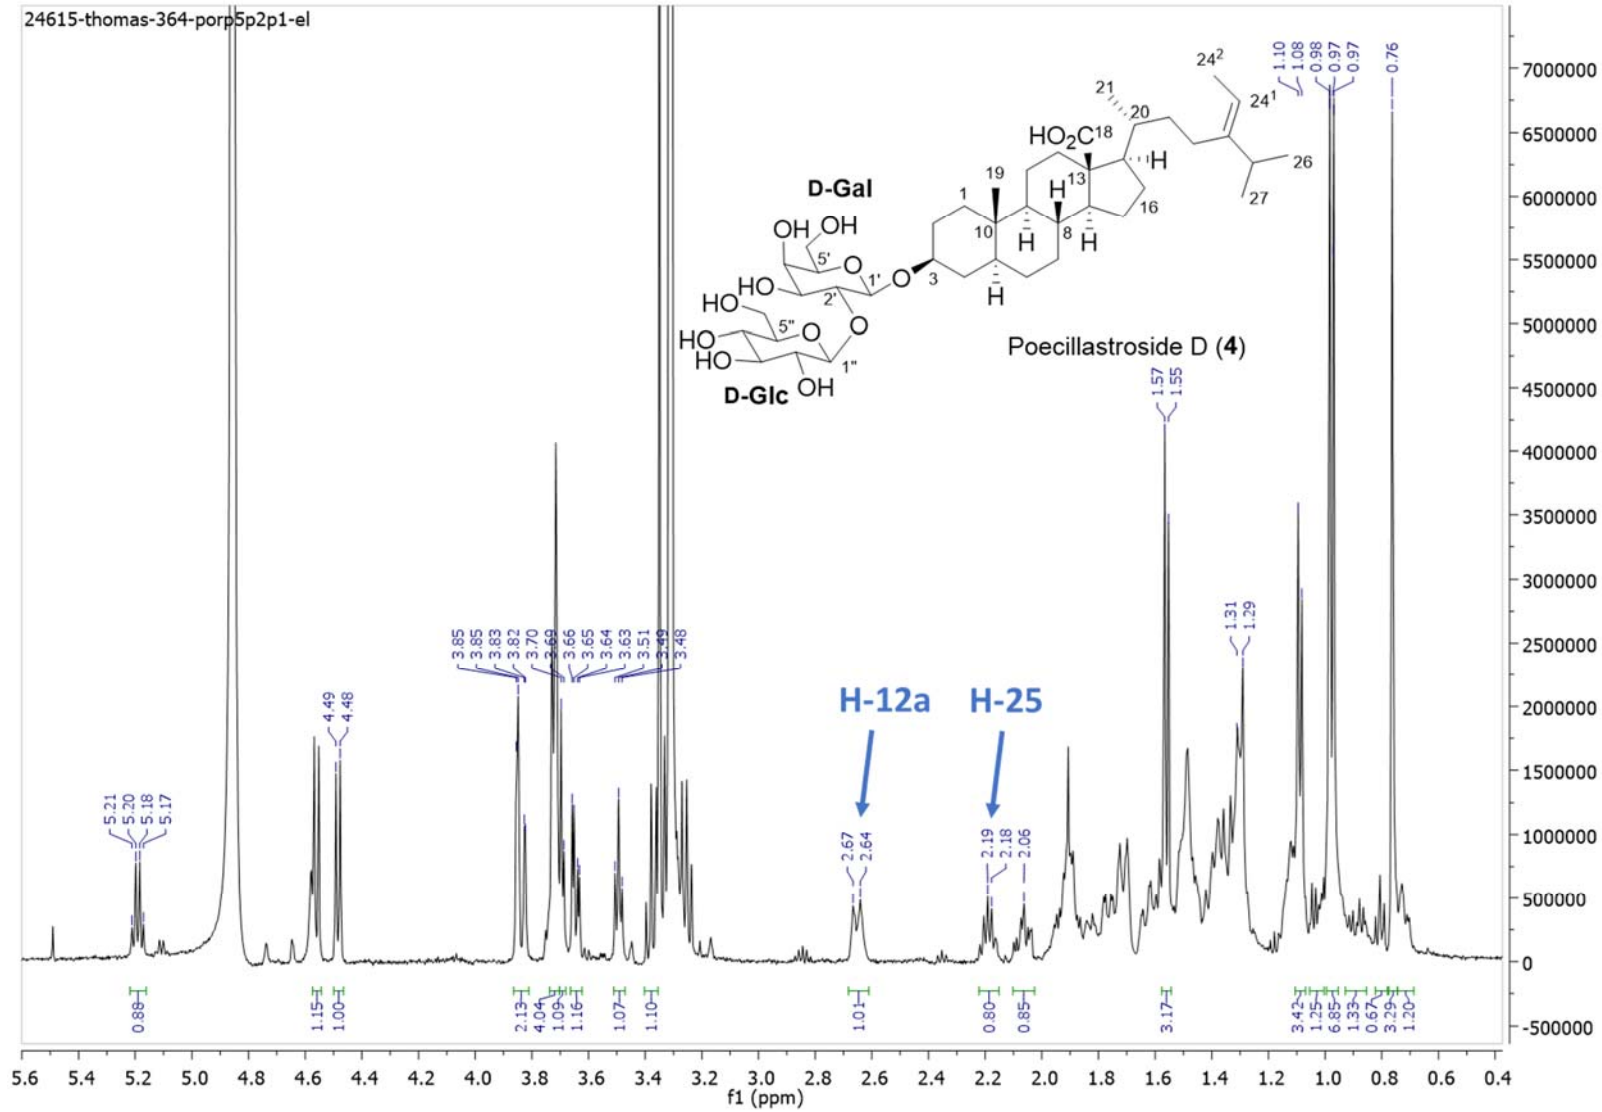

Figure S27. <sup>1</sup>H NMR spectrum of 4 at 500 MHz in CD<sub>3</sub>OD

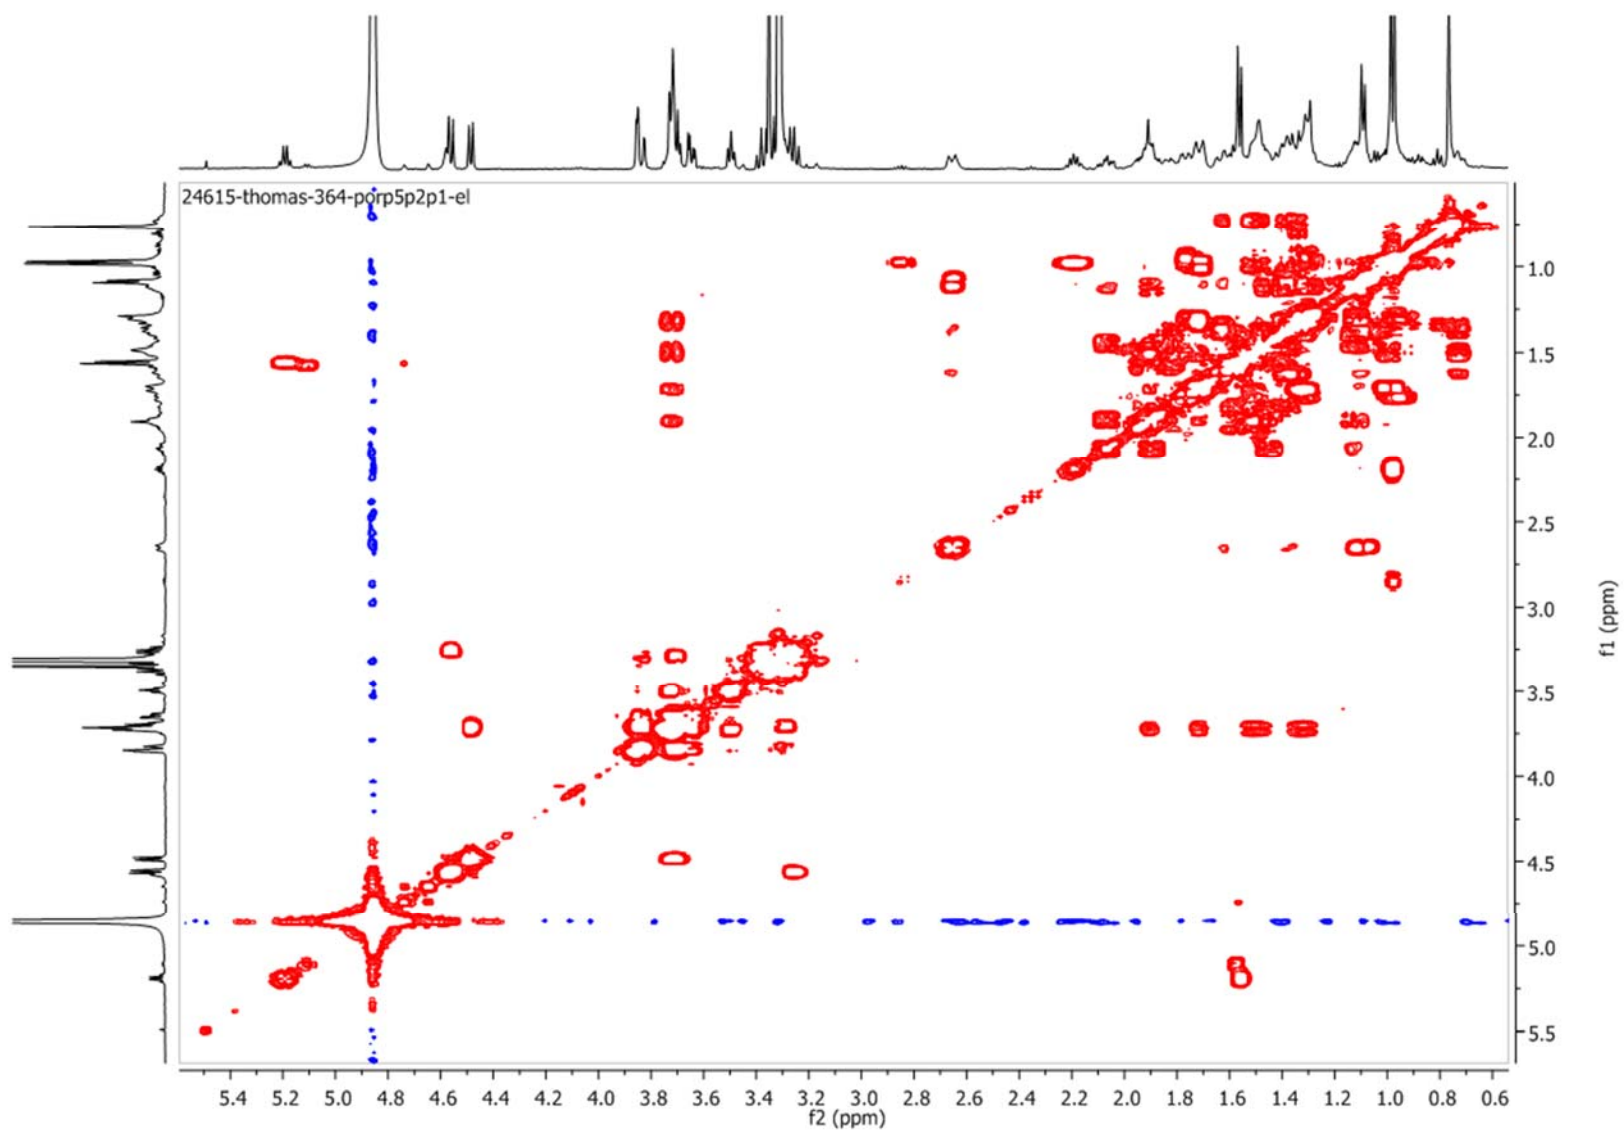

Figure S28. COSY NMR spectrum of **4** at 500 MHz in CD<sub>3</sub>OD

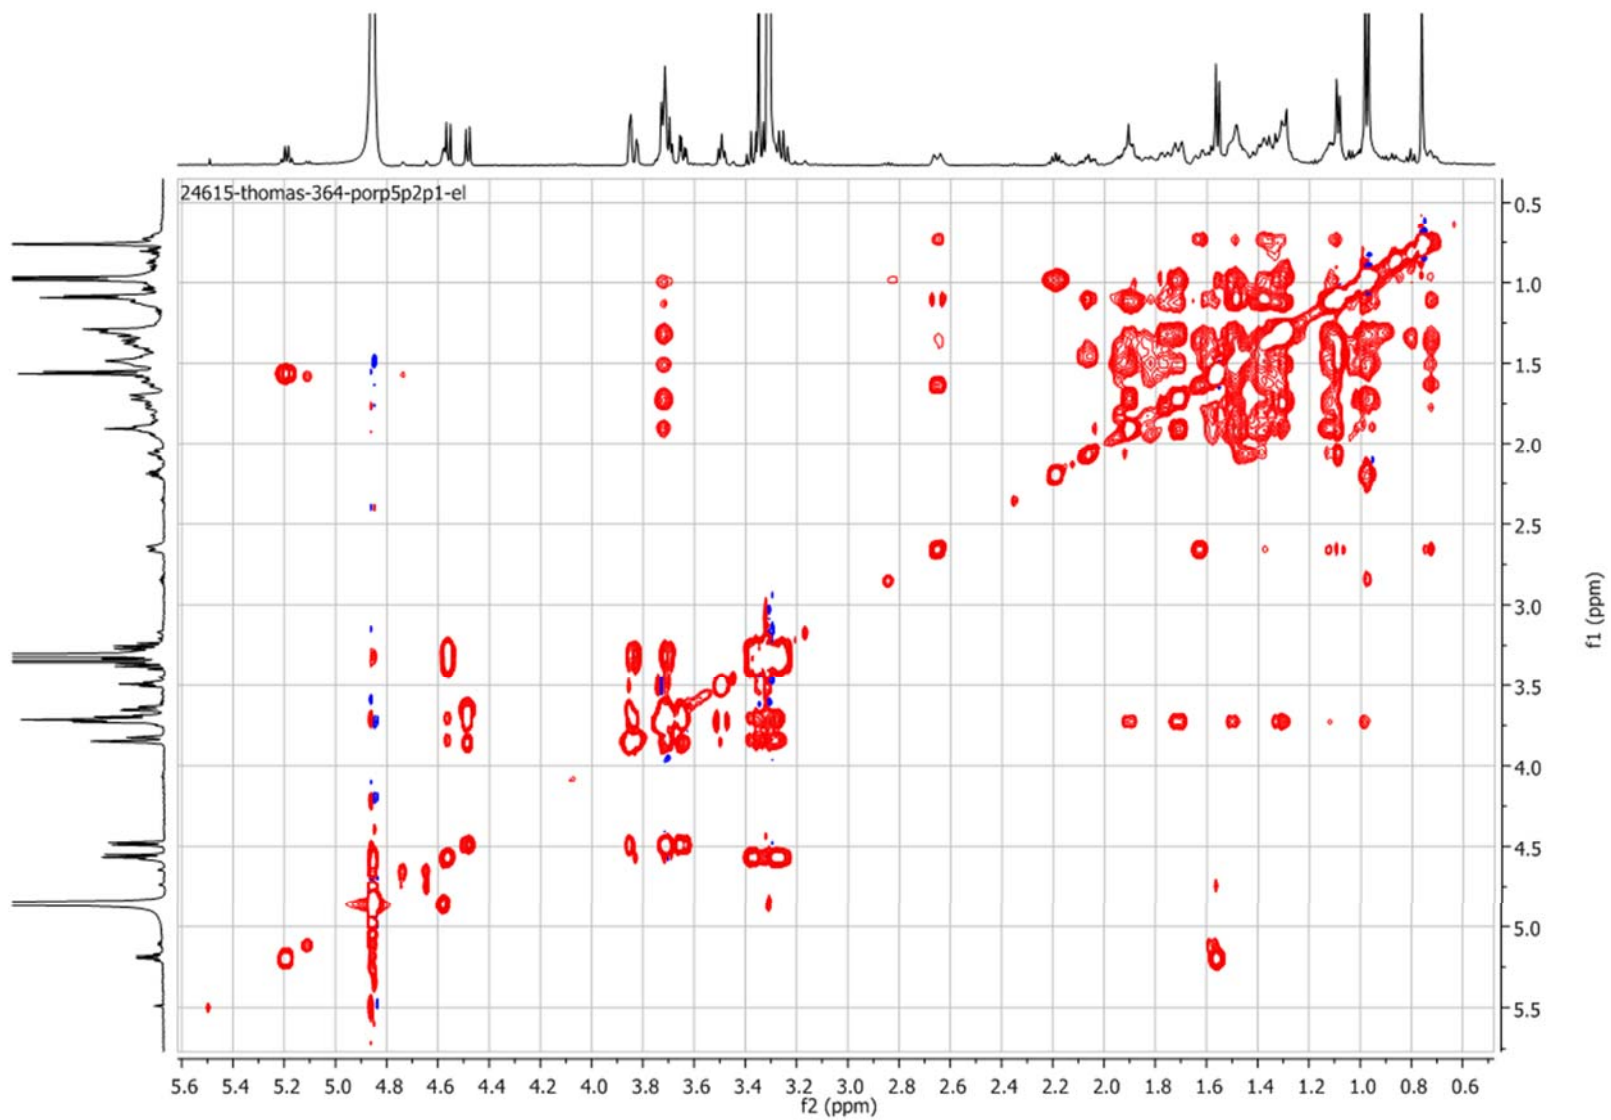

Figure S29. TOCSY NMR spectrum of **4** at 500 MHz in CD<sub>3</sub>OD



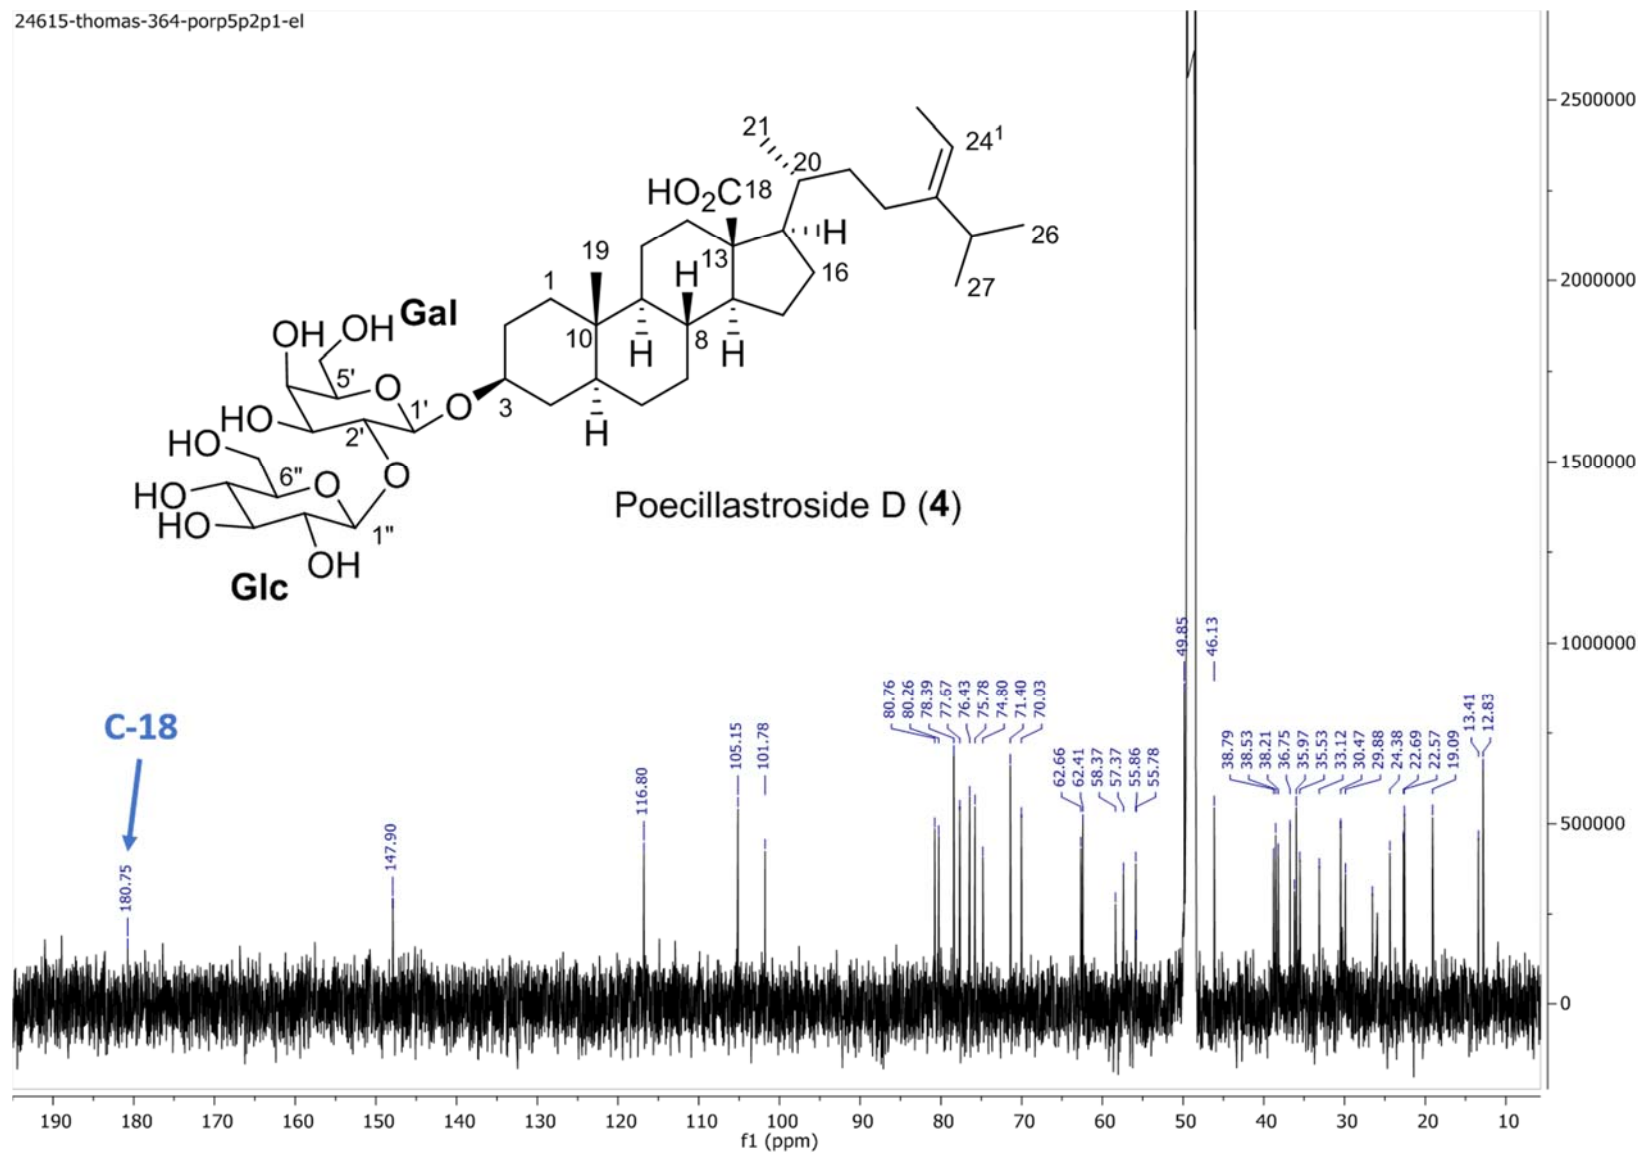

Figure S30. <sup>13</sup>C NMR spectrum of 4 at 125 MHz in CD<sub>3</sub>OD

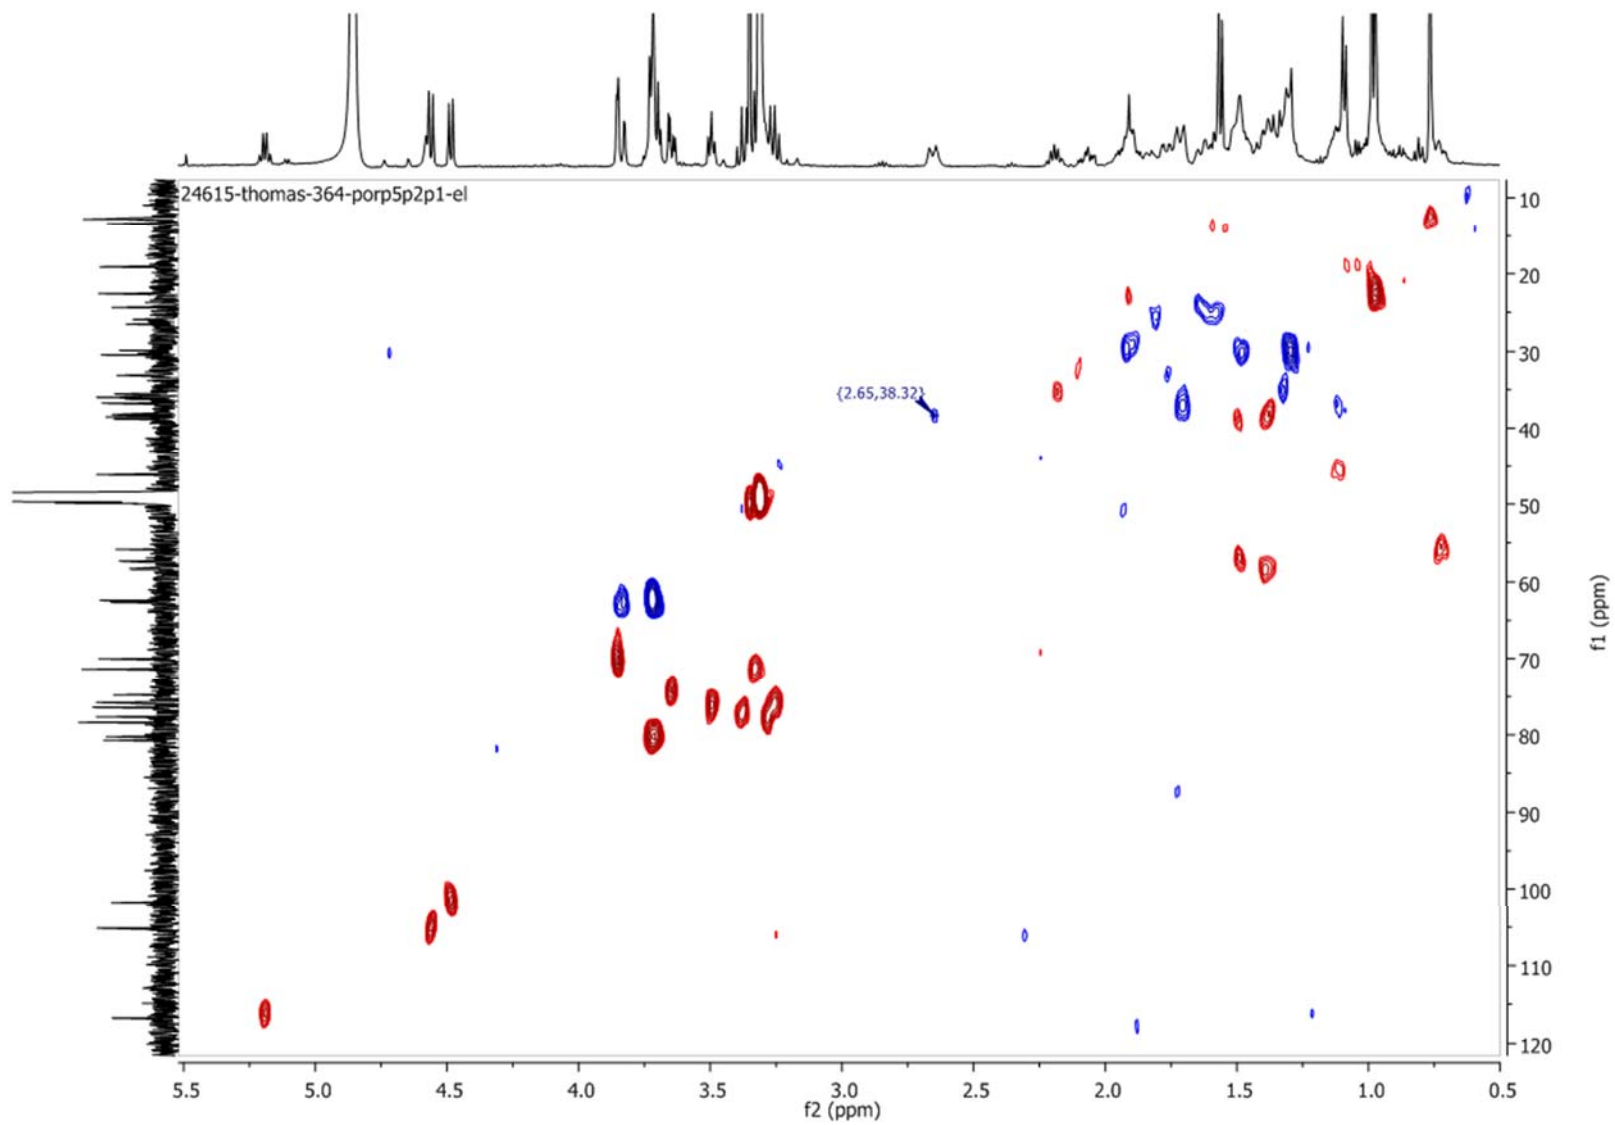

Figure S31. HSQC NMR spectrum of **4** at 500 MHz in CD<sub>3</sub>OD

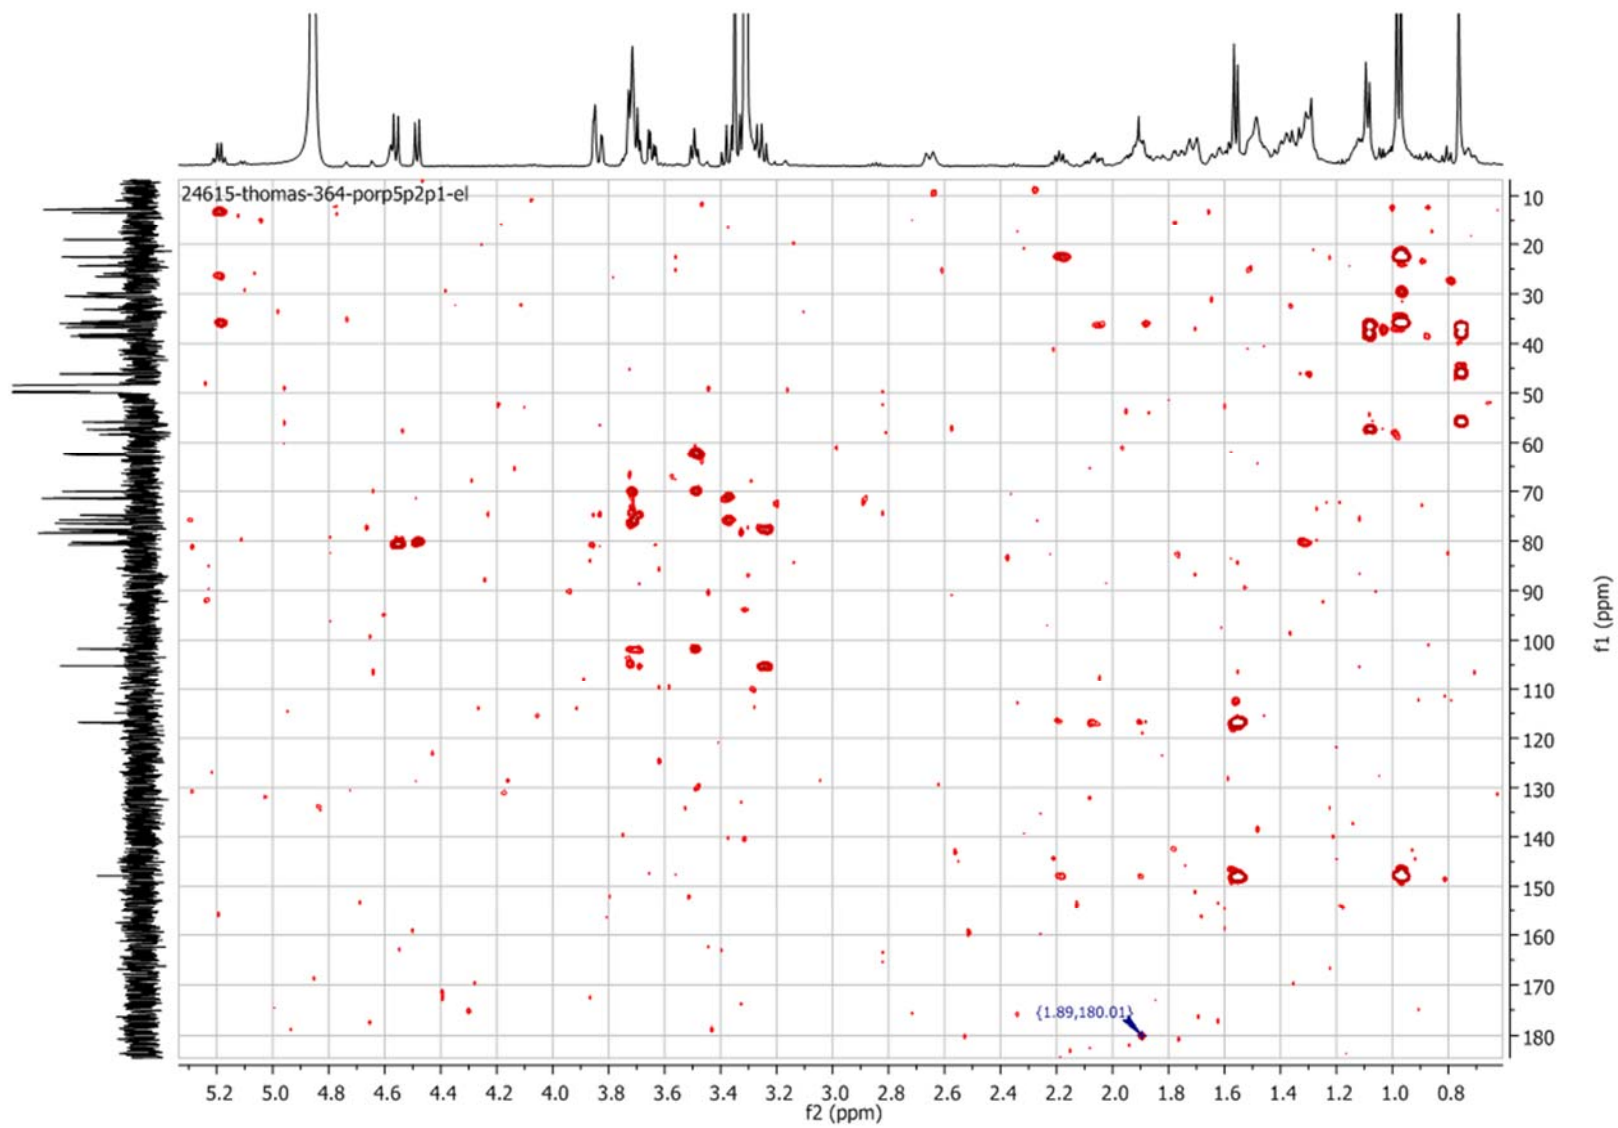

Figure S32. HMBC spectrum of **4** at 500 MHz in CD<sub>3</sub>OD

| Compound Formula                                | Name               | RT    | Algorithm           |
|-------------------------------------------------|--------------------|-------|---------------------|
| C <sub>43</sub> H <sub>66</sub> O <sub>15</sub> | Poecillastroside E | 7.109 | Spectrum Extraction |

5  
x10  
MS Spectrum

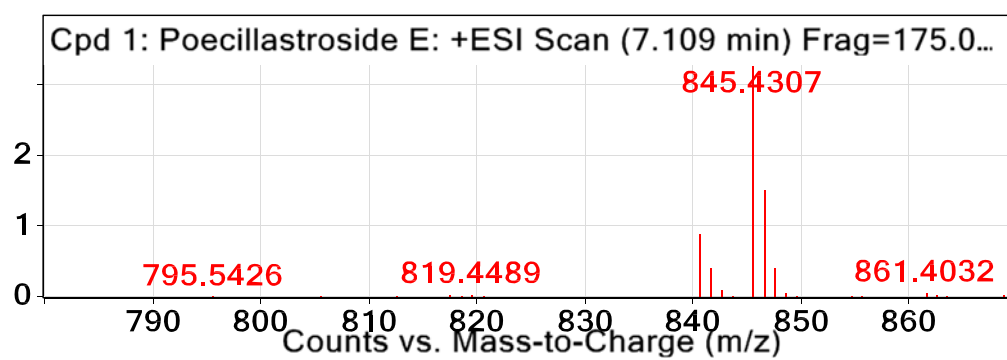

Figure S33. (+)-HRESIMS analysis of 5.

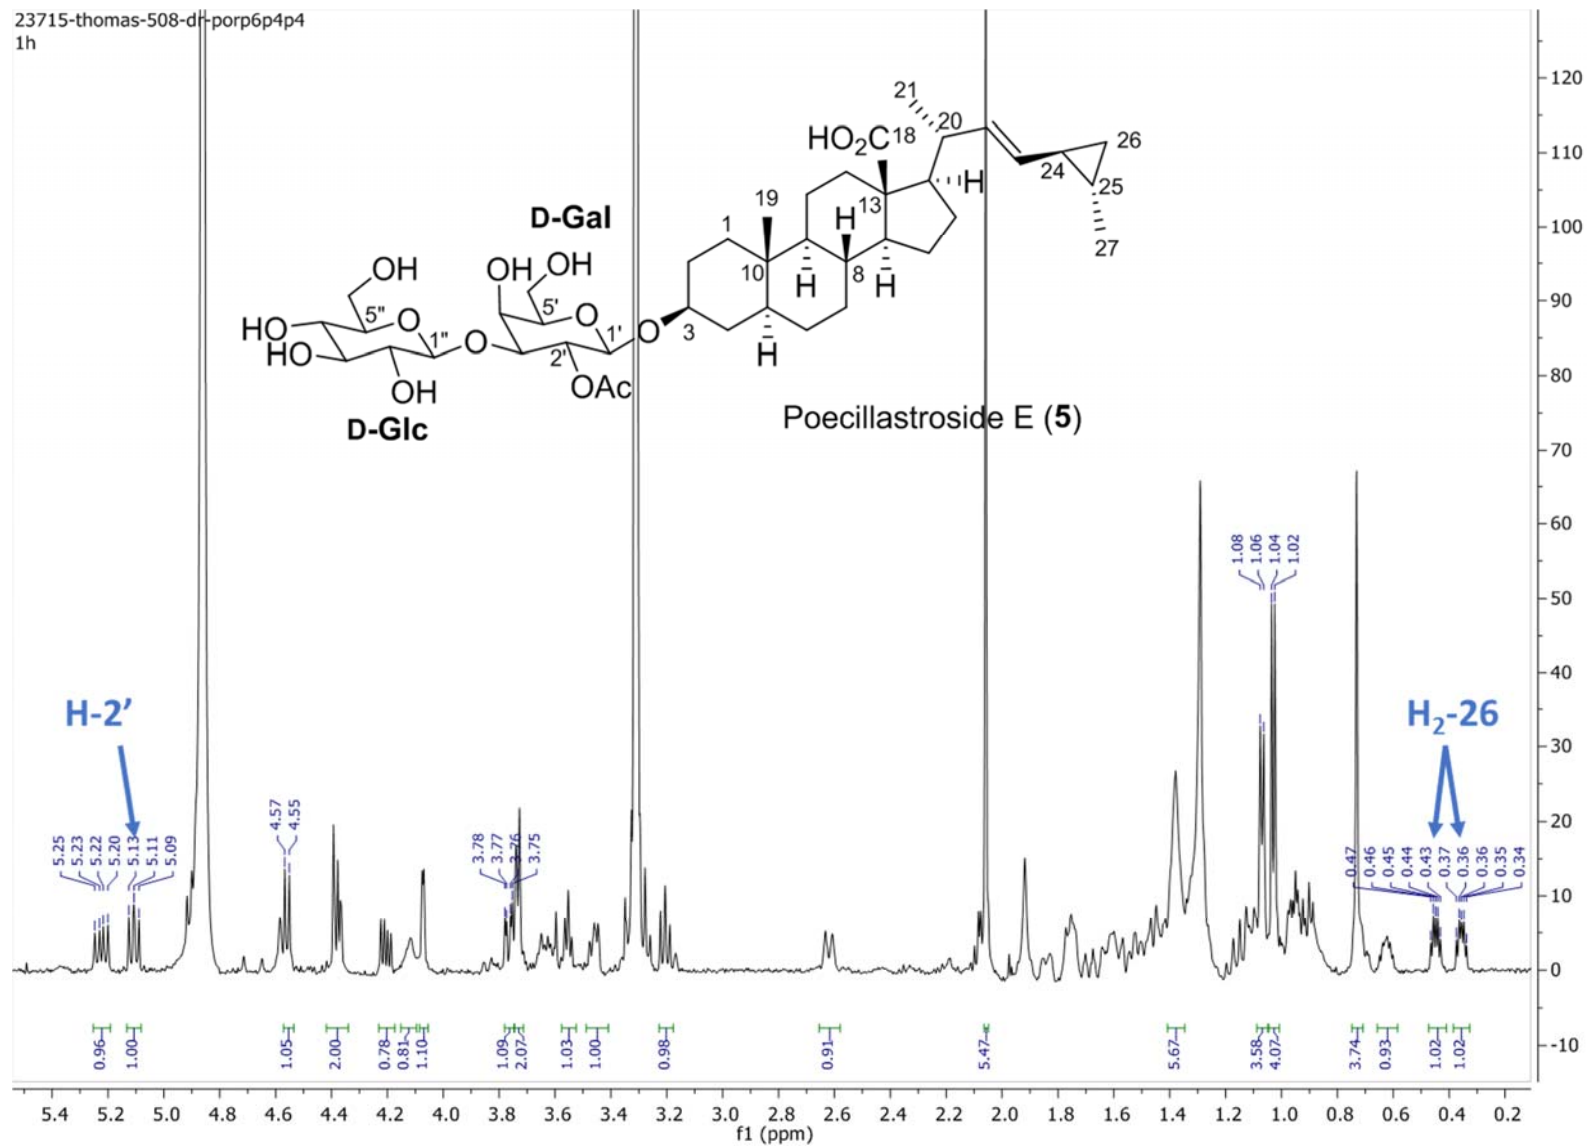

Figure S34. <sup>1</sup>H NMR spectrum of 5 at 500 MHz in CD<sub>3</sub>OD

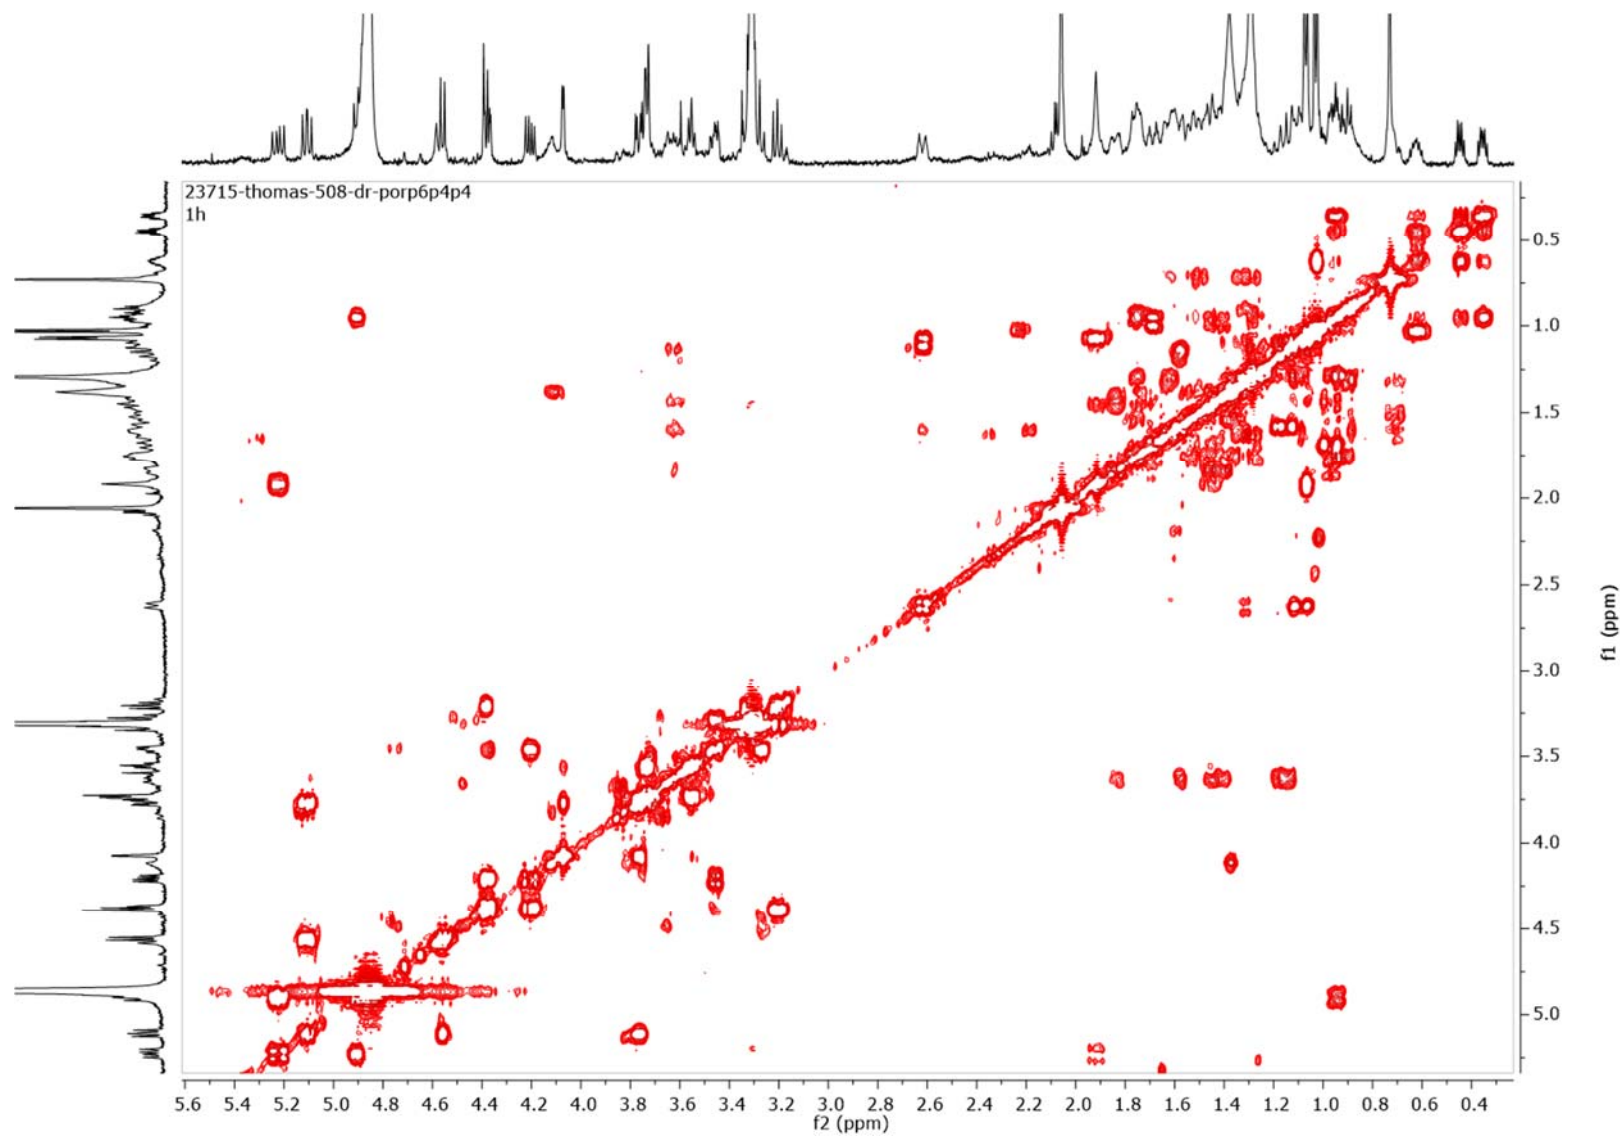

Figure S35. COSY NMR spectrum of **5** at 500 MHz in CD<sub>3</sub>OD

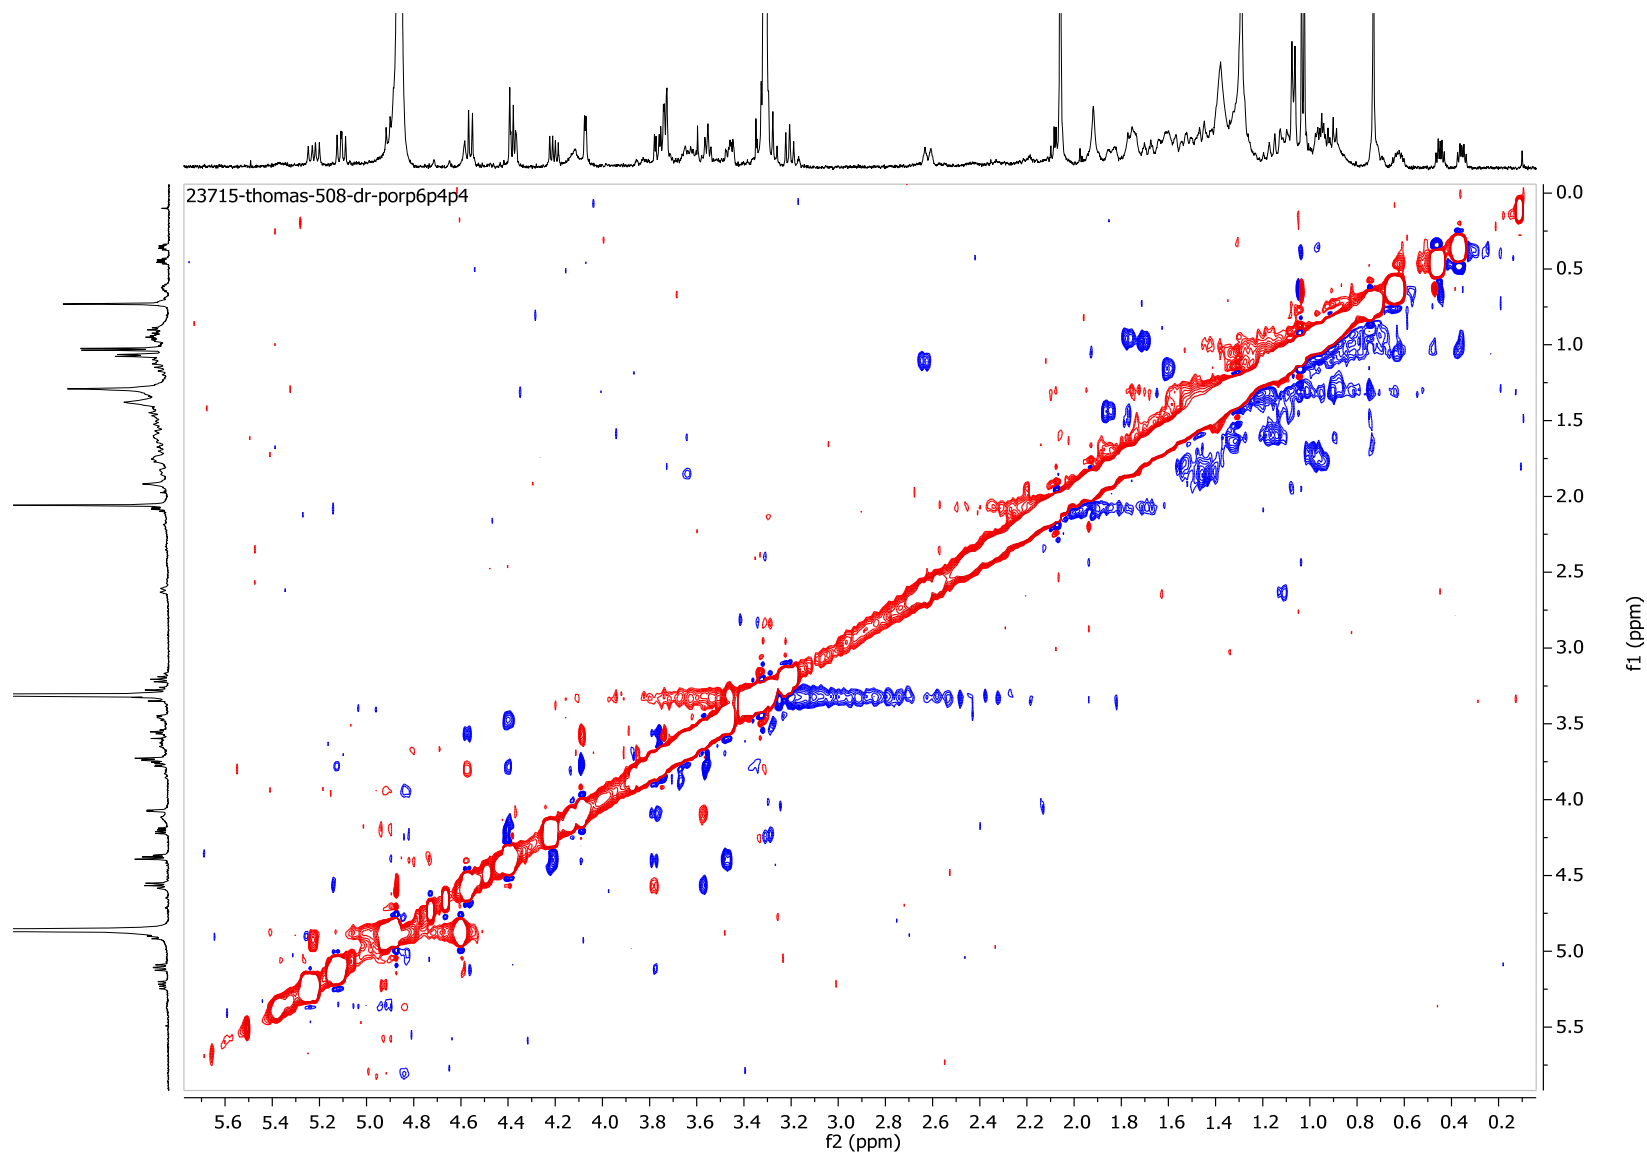

**Figure S36.** NOESY NMR spectrum of **5** at 500 MHz in CD<sub>3</sub>OD

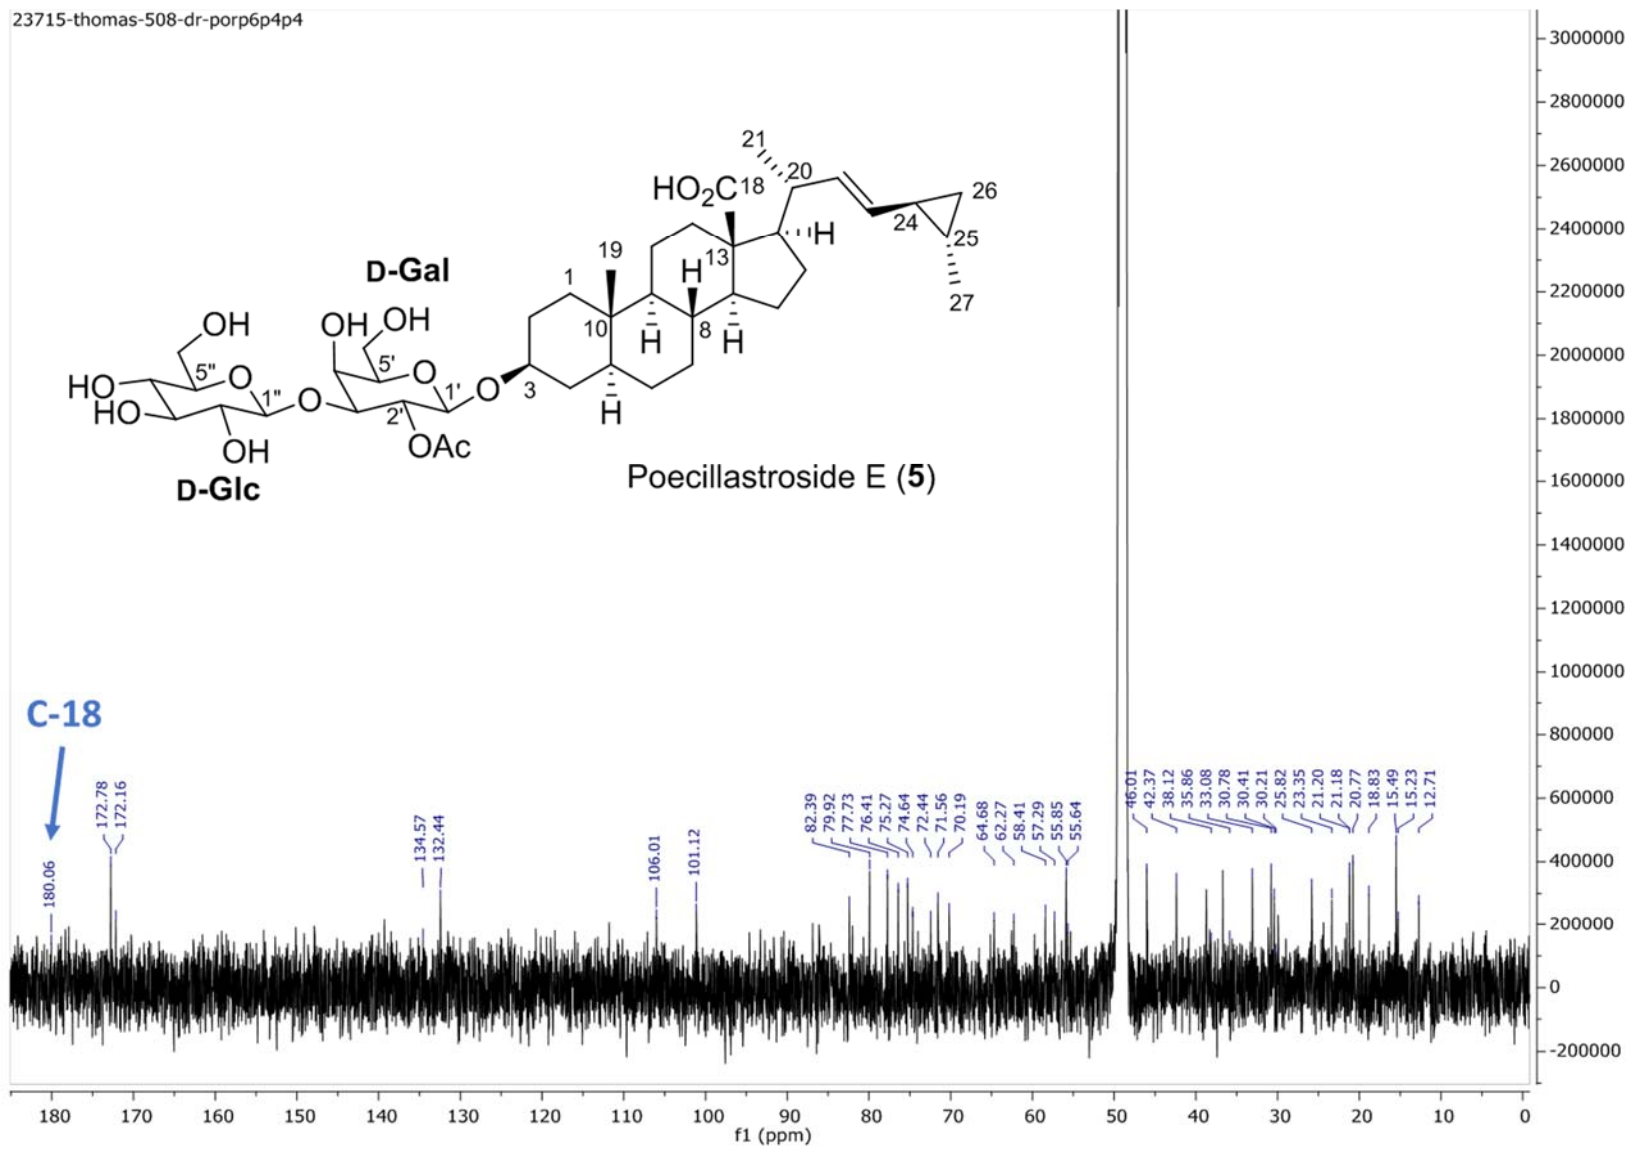

Figure S37.  $^{13}\text{C}$  NMR spectrum of **5** at 125 MHz in  $\text{CD}_3\text{OD}$



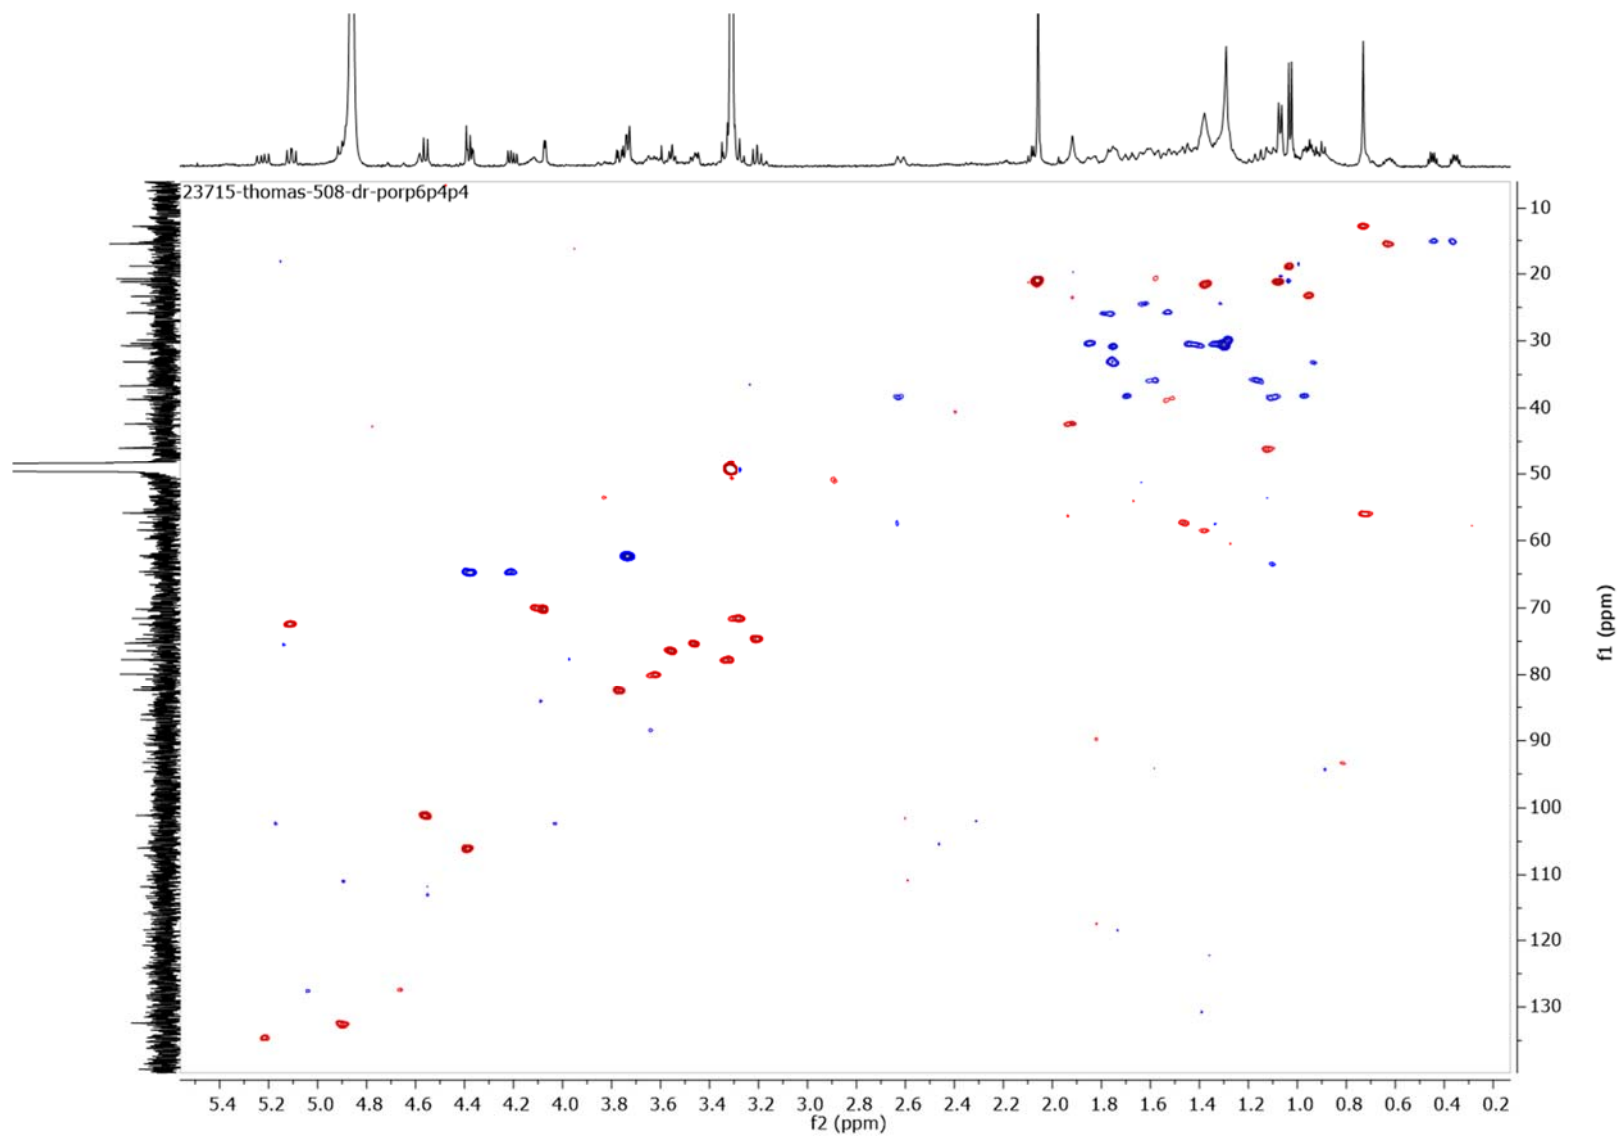

Figure S38. HSQC NMR spectrum of **5** at 500 MHz in CD<sub>3</sub>OD

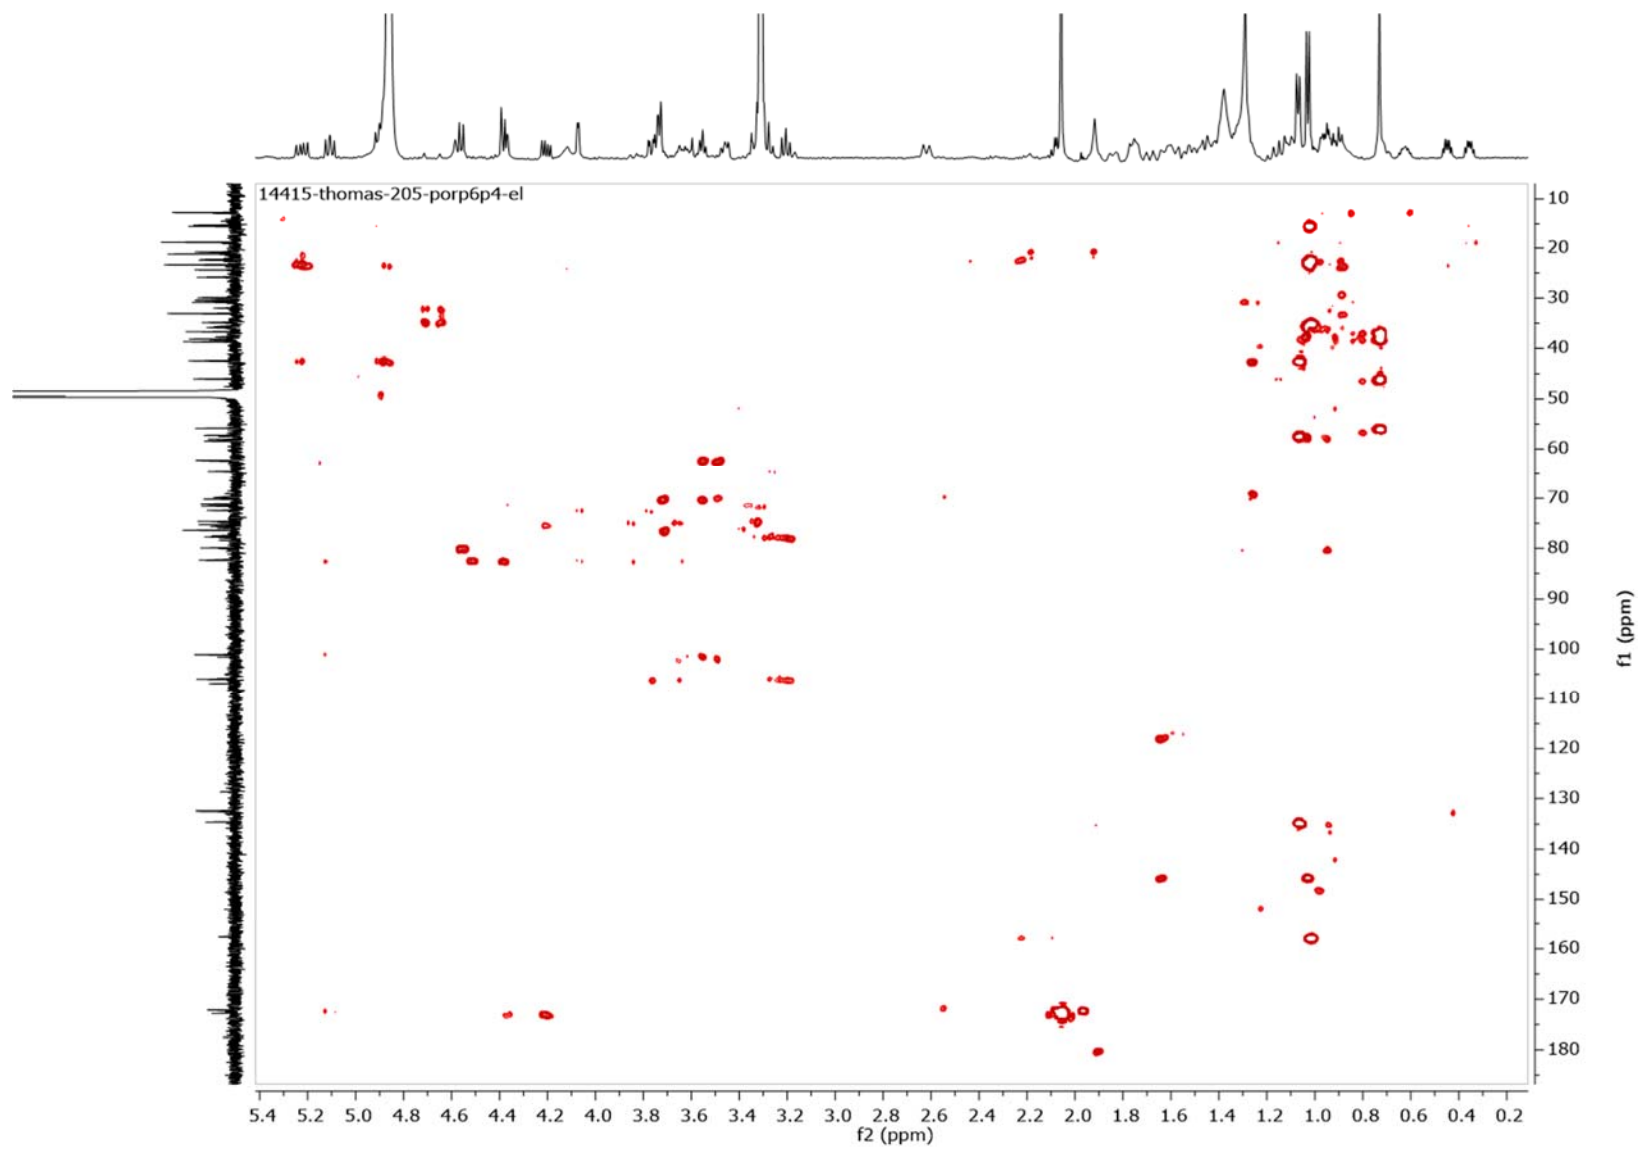

Figure S39. HMBC spectrum of 5 at 500 MHz in CD<sub>3</sub>OD

| Compound Formula                                | Name               | RT    | Algorithm           |
|-------------------------------------------------|--------------------|-------|---------------------|
| C <sub>41</sub> H <sub>66</sub> O <sub>13</sub> | Poecillastroside F | 7.024 | Spectrum Extraction |

MS Spectrum

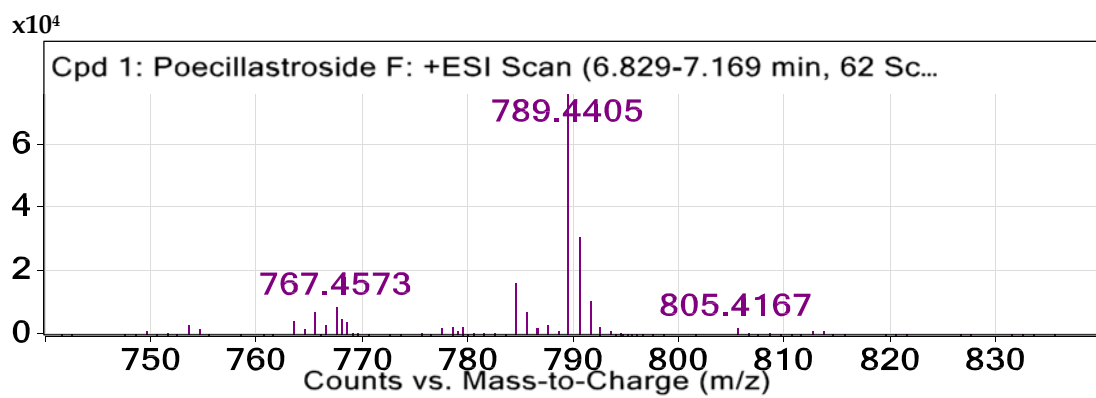

Figure S40. (+)-HRESIMS analysis of 6.

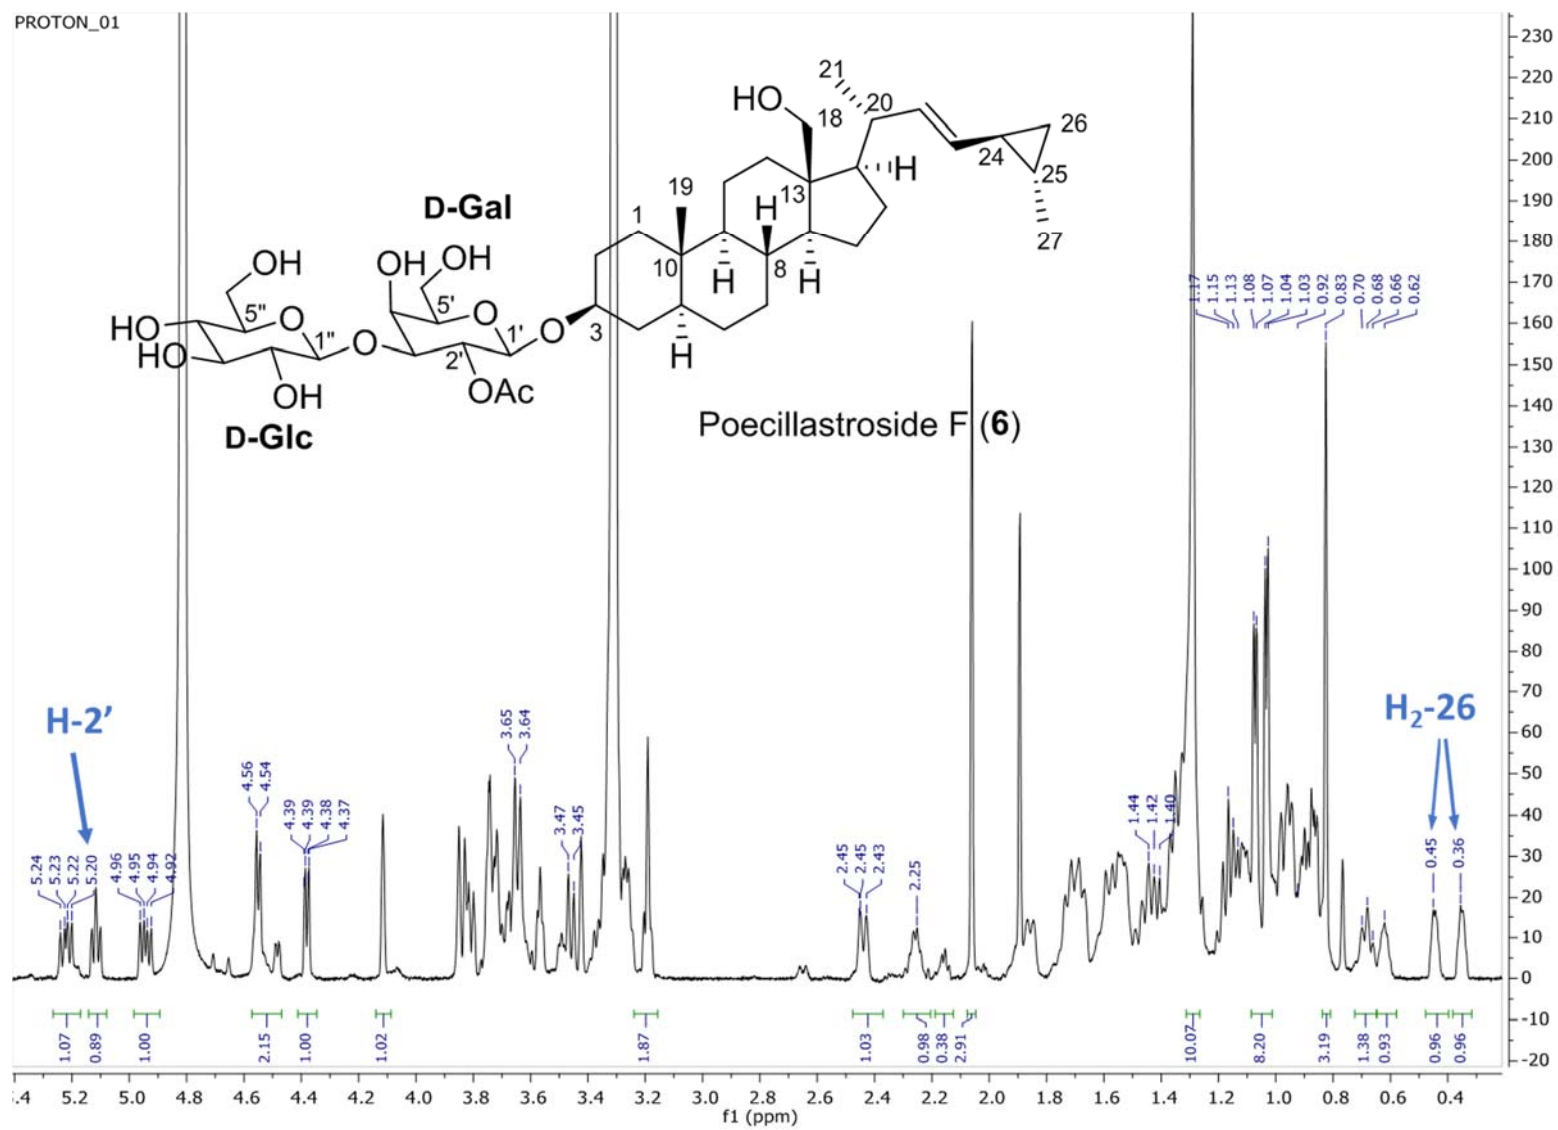

Figure S41. <sup>1</sup>H NMR spectrum of **6** at 600 MHz in CD<sub>3</sub>OD

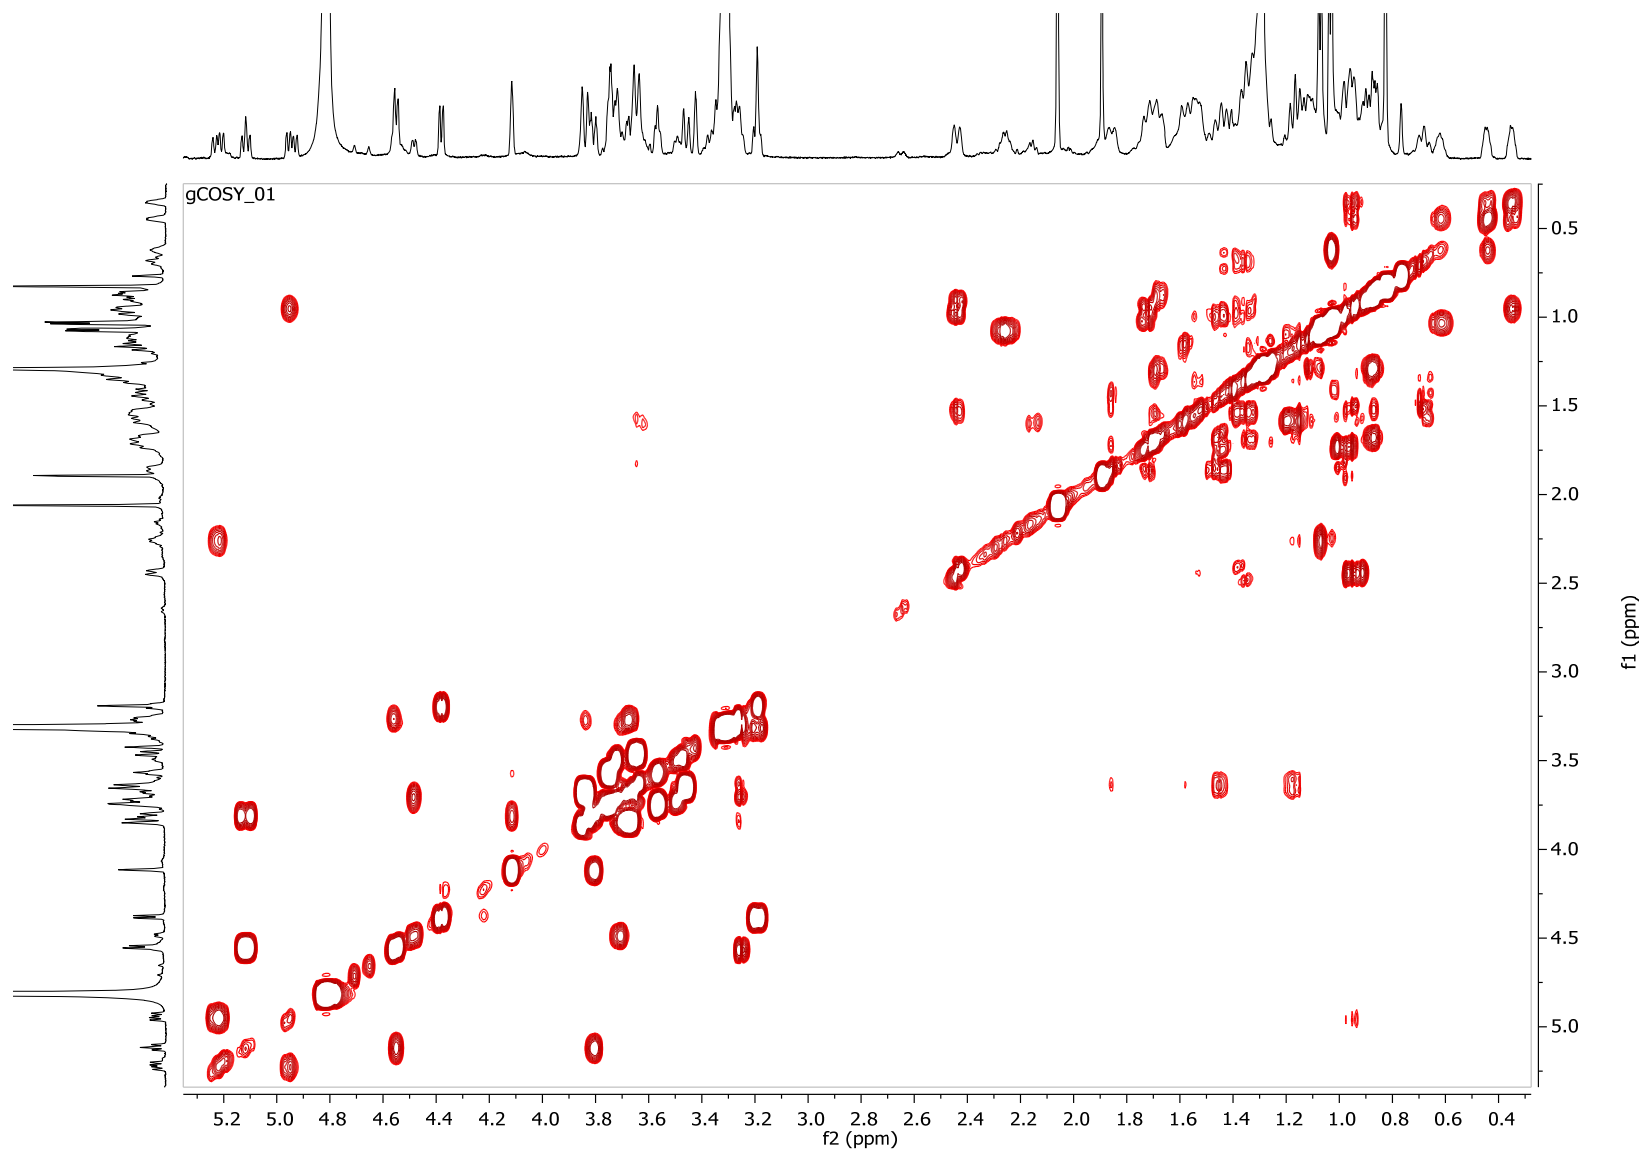

**Figure S42.** COSY NMR spectrum of **6** at 600 MHz in CD<sub>3</sub>OD

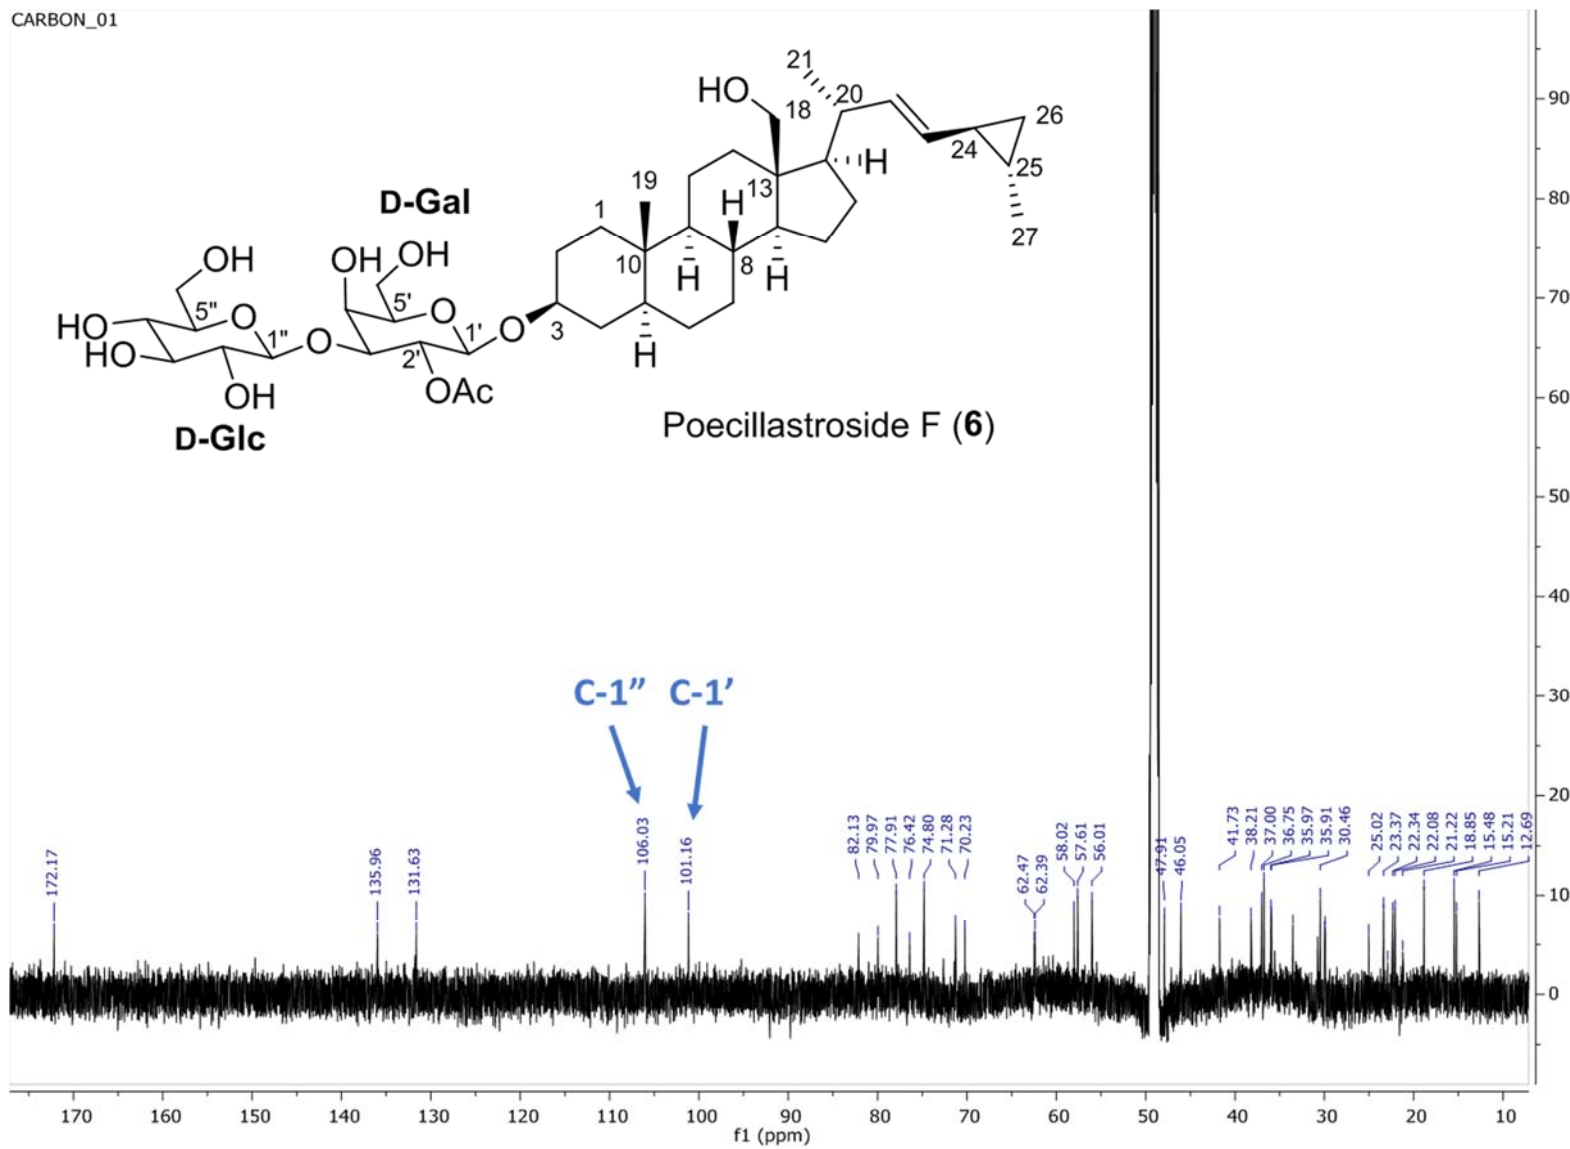

Figure S43.  $^{13}\text{C}$  NMR spectrum of **6** at 150 MHz in  $\text{CD}_3\text{OD}$

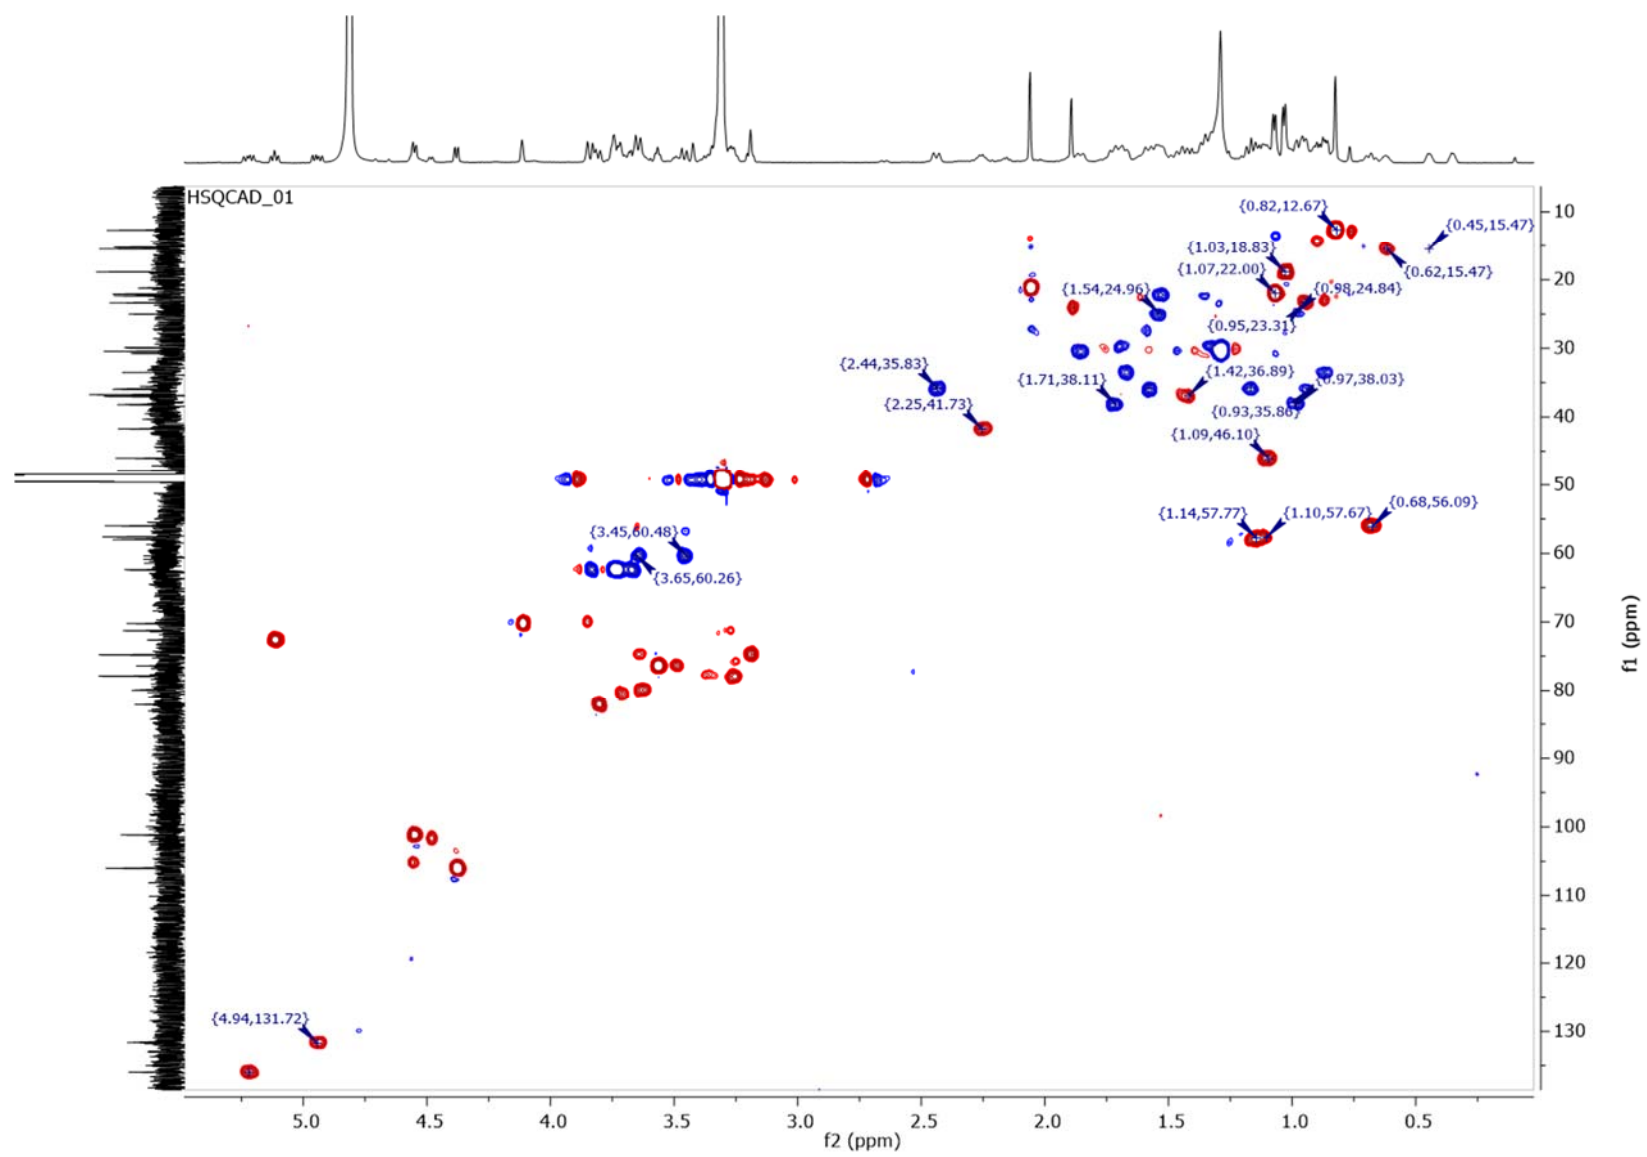

Figure S44. HSQC NMR spectrum of 6 at 600 MHz in CD<sub>3</sub>OD

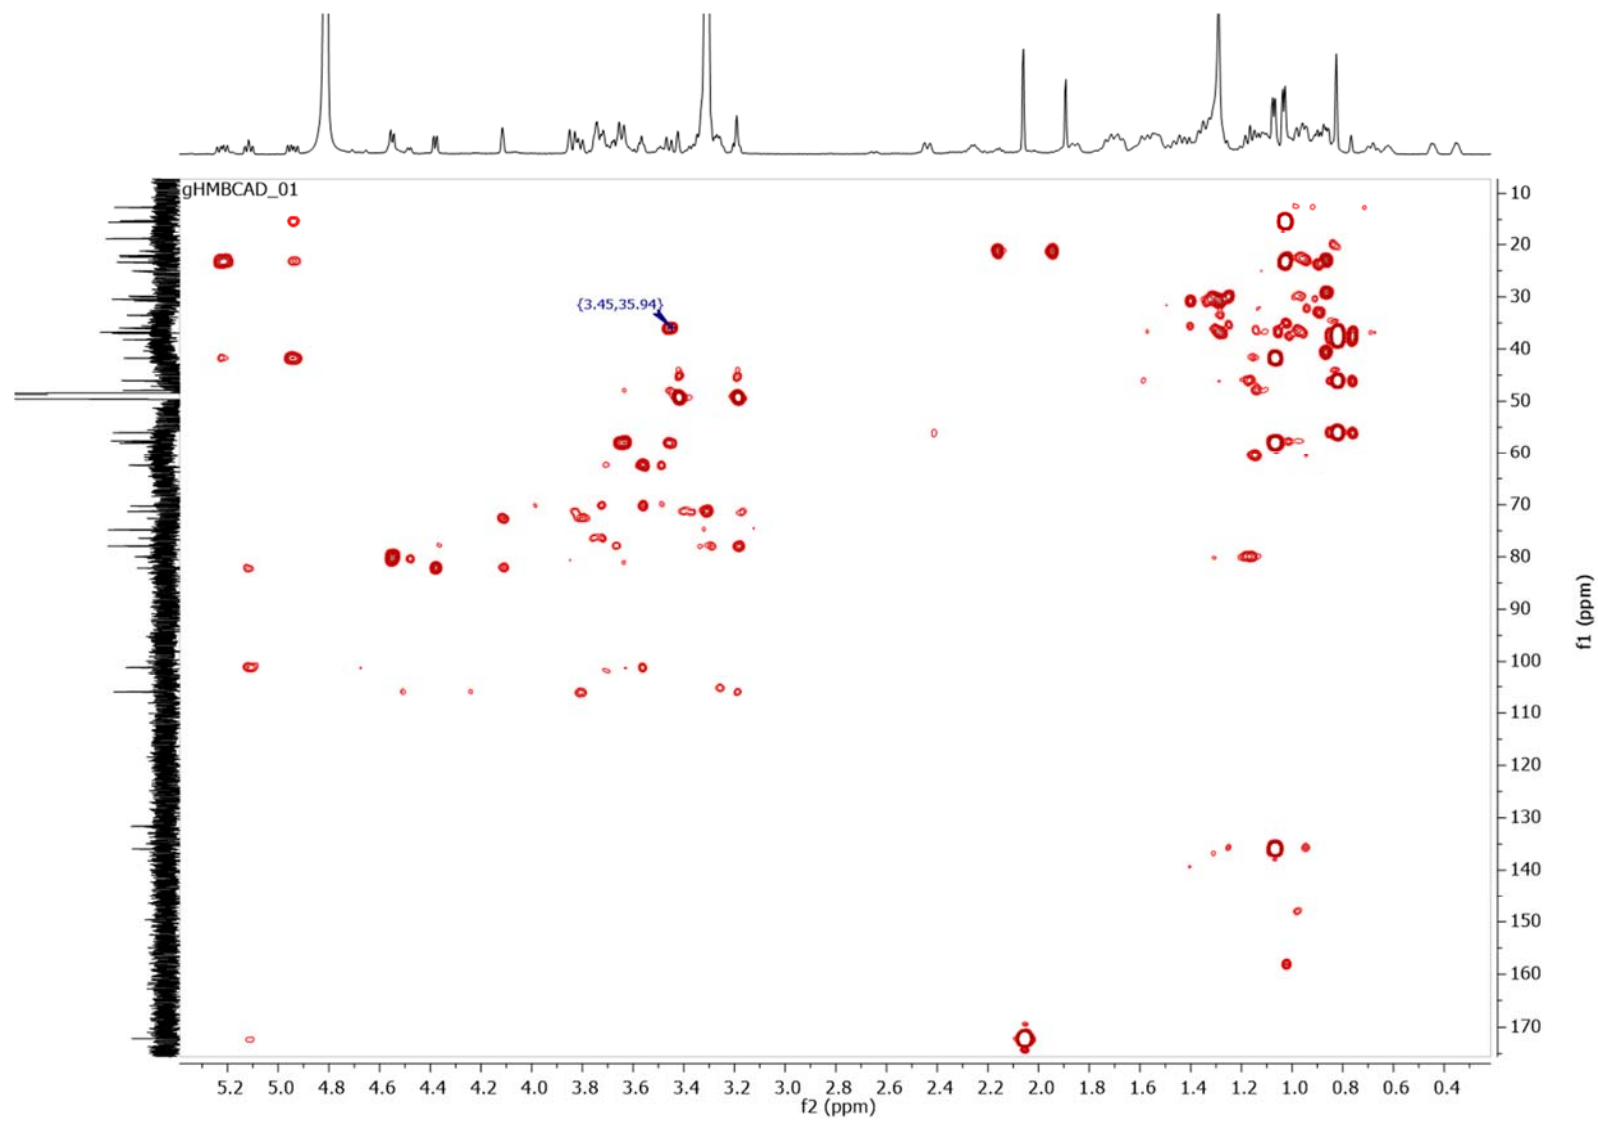

Figure S45. HMBC spectrum of 6 at 600 MHz in CD<sub>3</sub>OD



| Compound Formula                                | Name               | RT    | Algorithm           |
|-------------------------------------------------|--------------------|-------|---------------------|
| C <sub>43</sub> H <sub>68</sub> O <sub>14</sub> | Poecillastroside G | 7.384 | Spectrum Extraction |

MS Spectrum

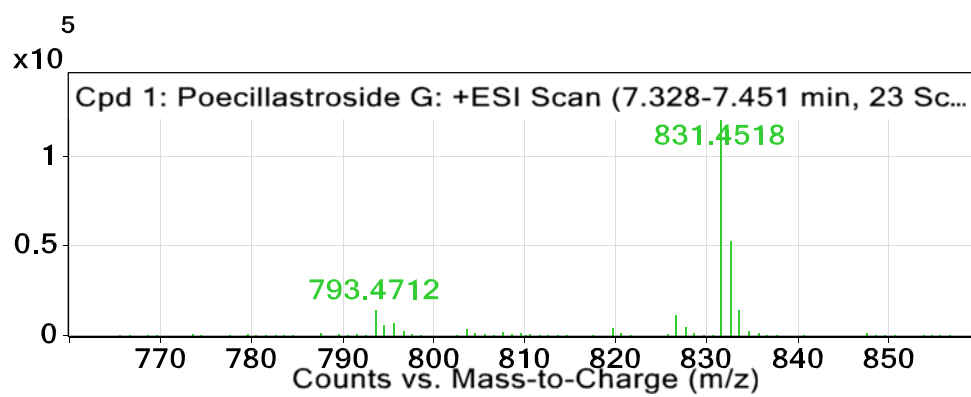

Figure S46. (+)-HRESIMS analysis of 7.

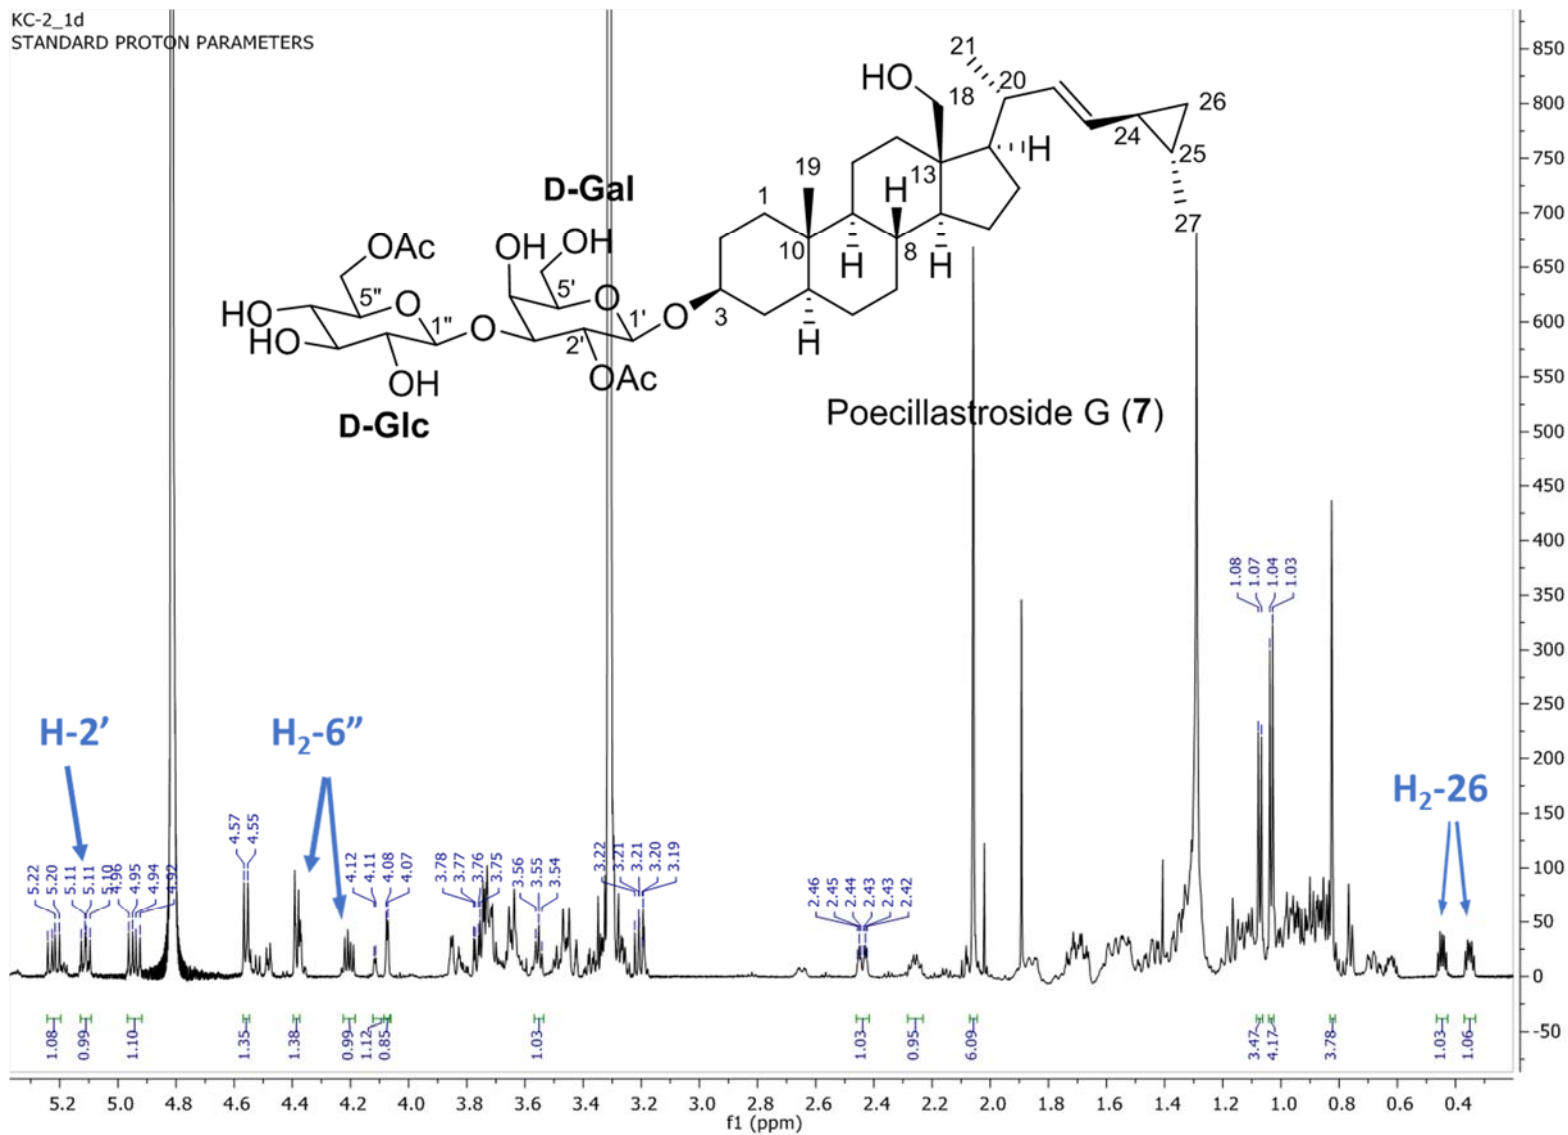

Figure S47. <sup>1</sup>H NMR spectrum of 7 at 600 MHz in CD<sub>3</sub>OD

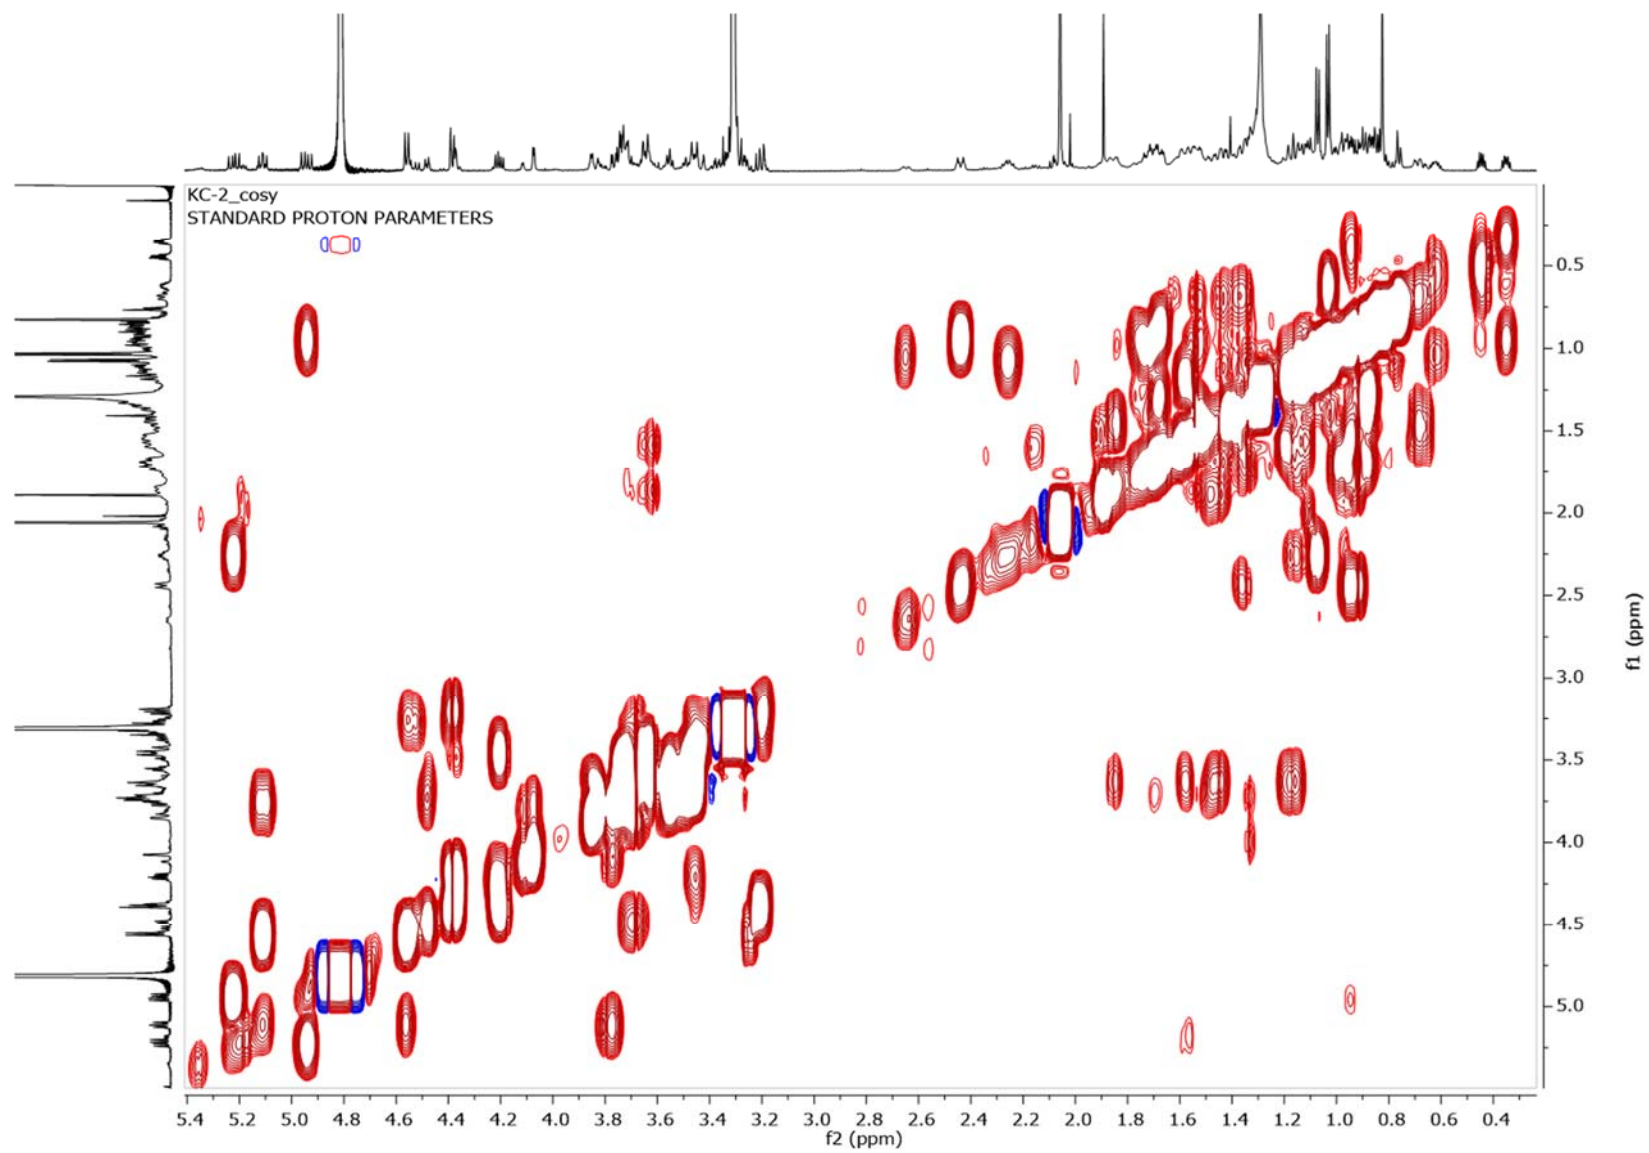

Figure S48. COSY NMR spectrum of 7 at 600 MHz in CD<sub>3</sub>OD

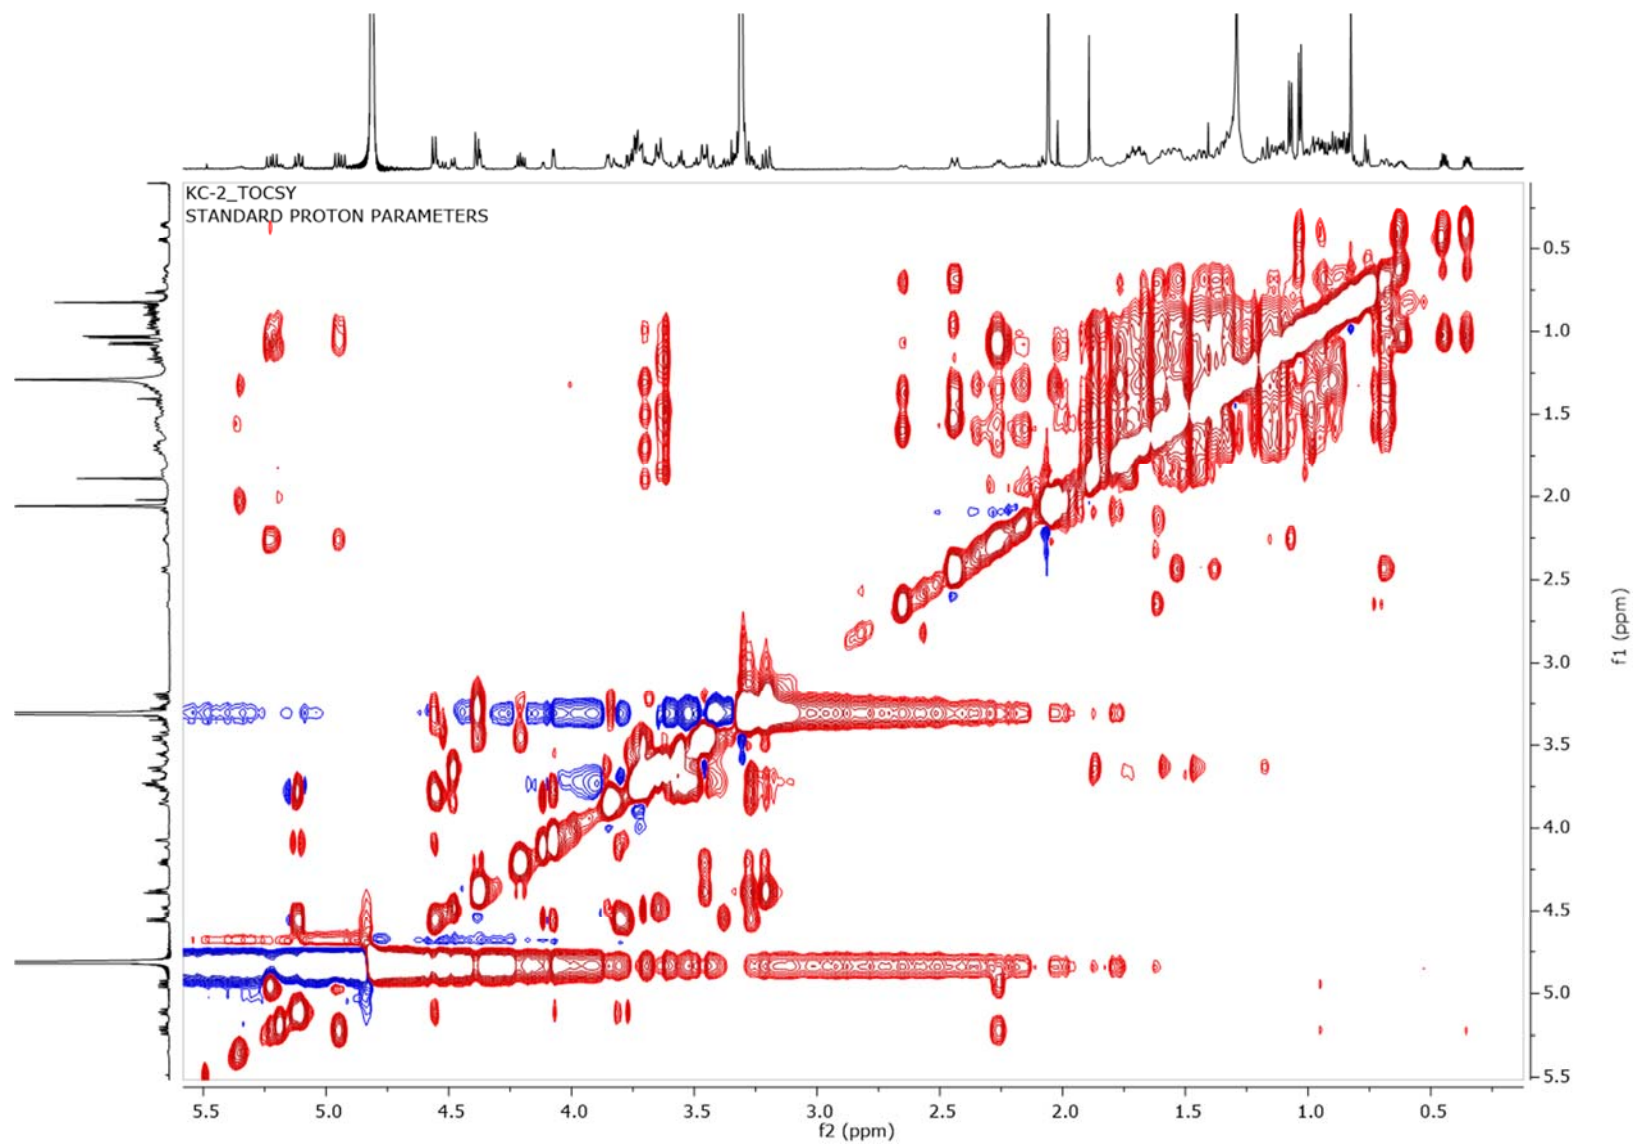

Figure S49. TOCSY NMR spectrum of 7 at 600 MHz in CD<sub>3</sub>OD

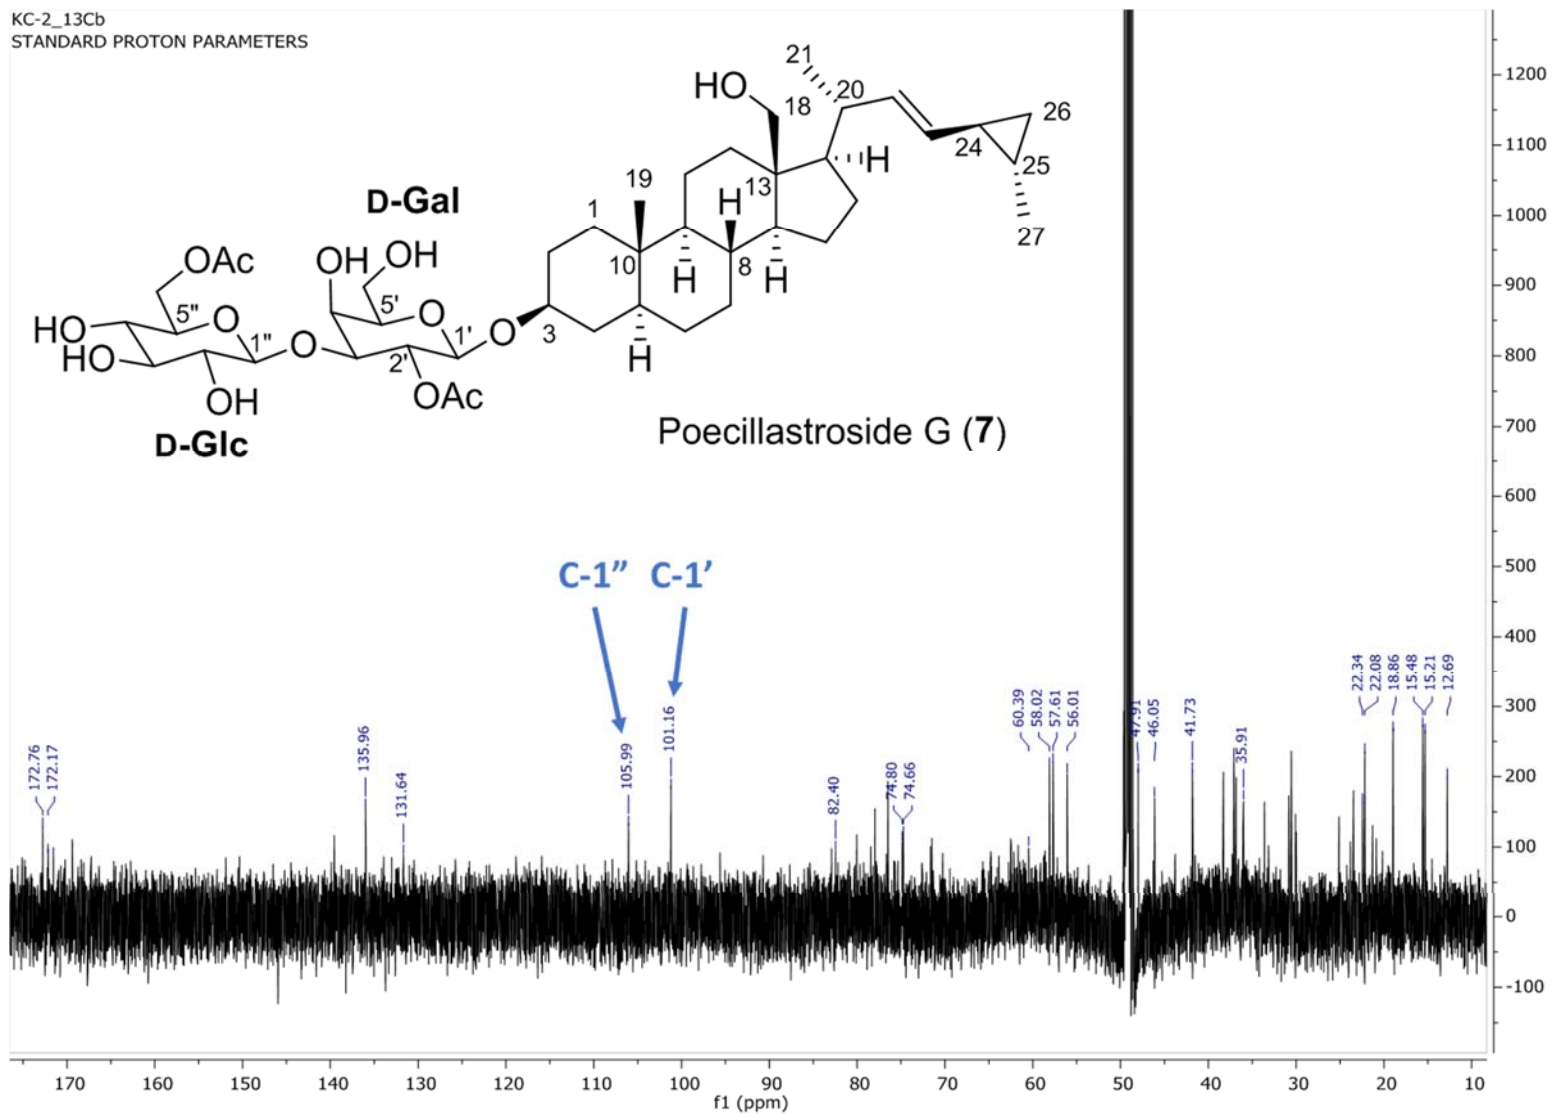

Figure S50. <sup>13</sup>C NMR spectrum of 7 at 150 MHz in CD<sub>3</sub>OD

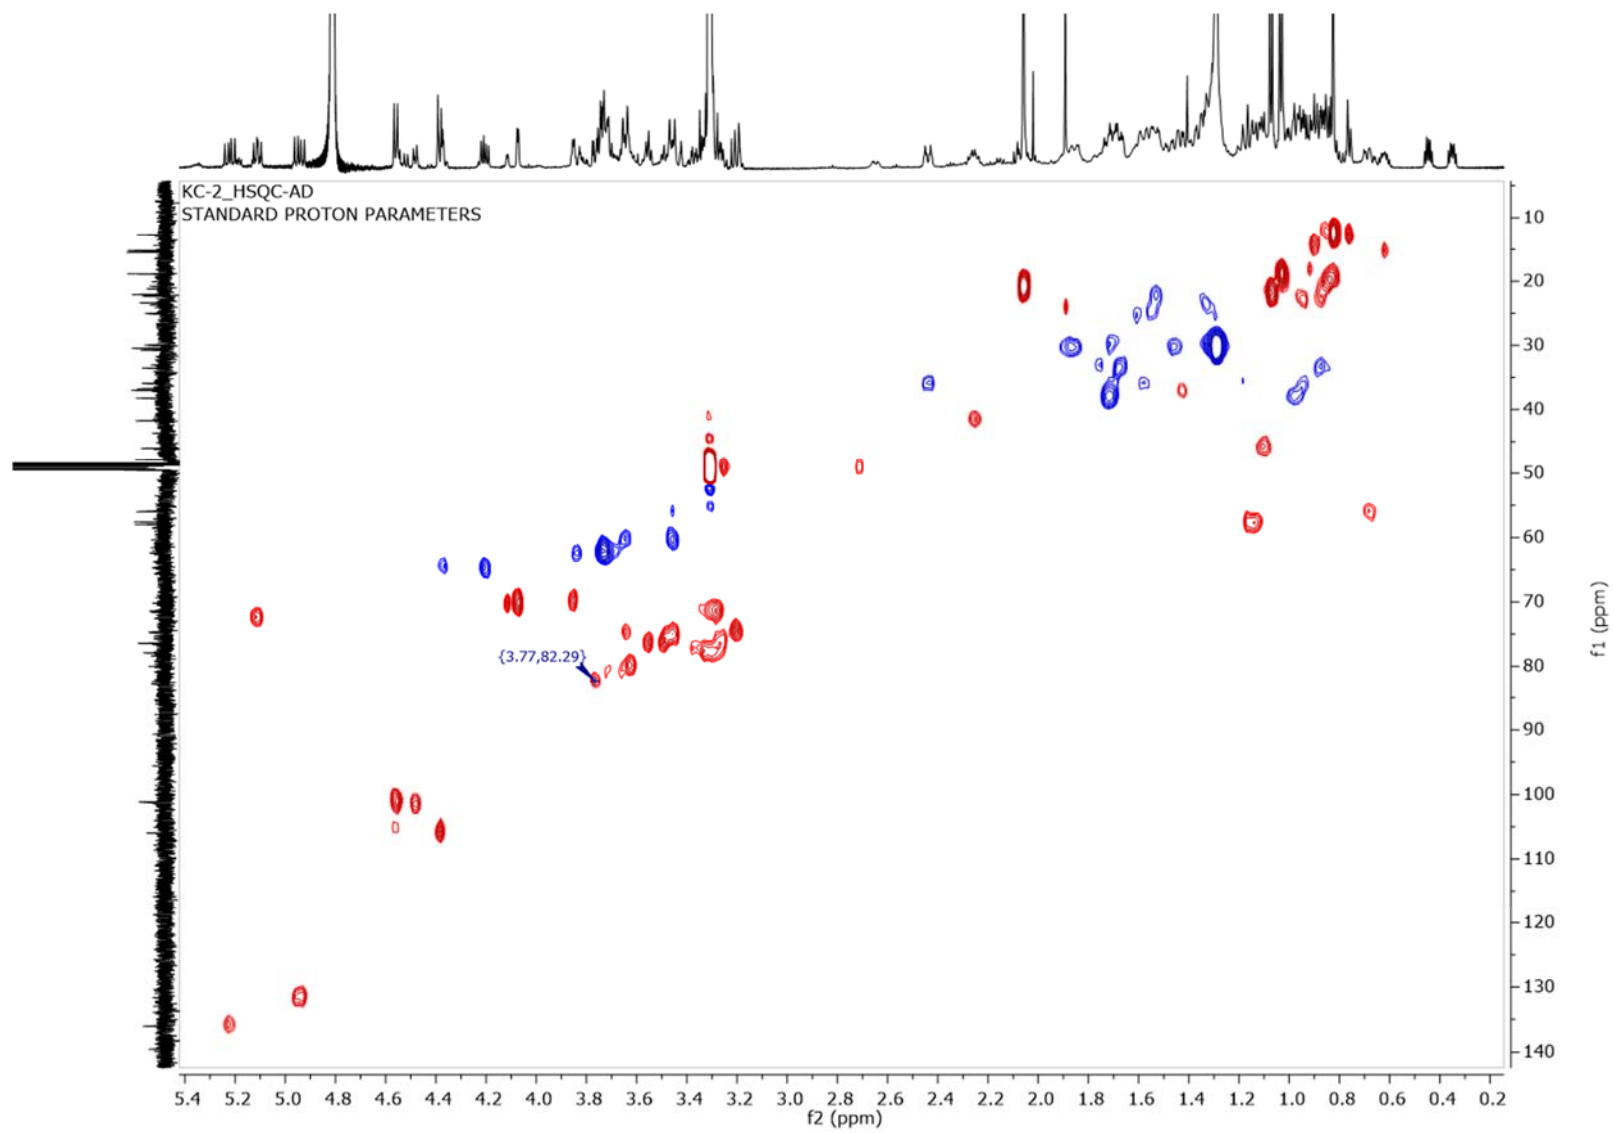

Figure S51. HSQC NMR spectrum of **7** at 600 MHz in CD<sub>3</sub>OD

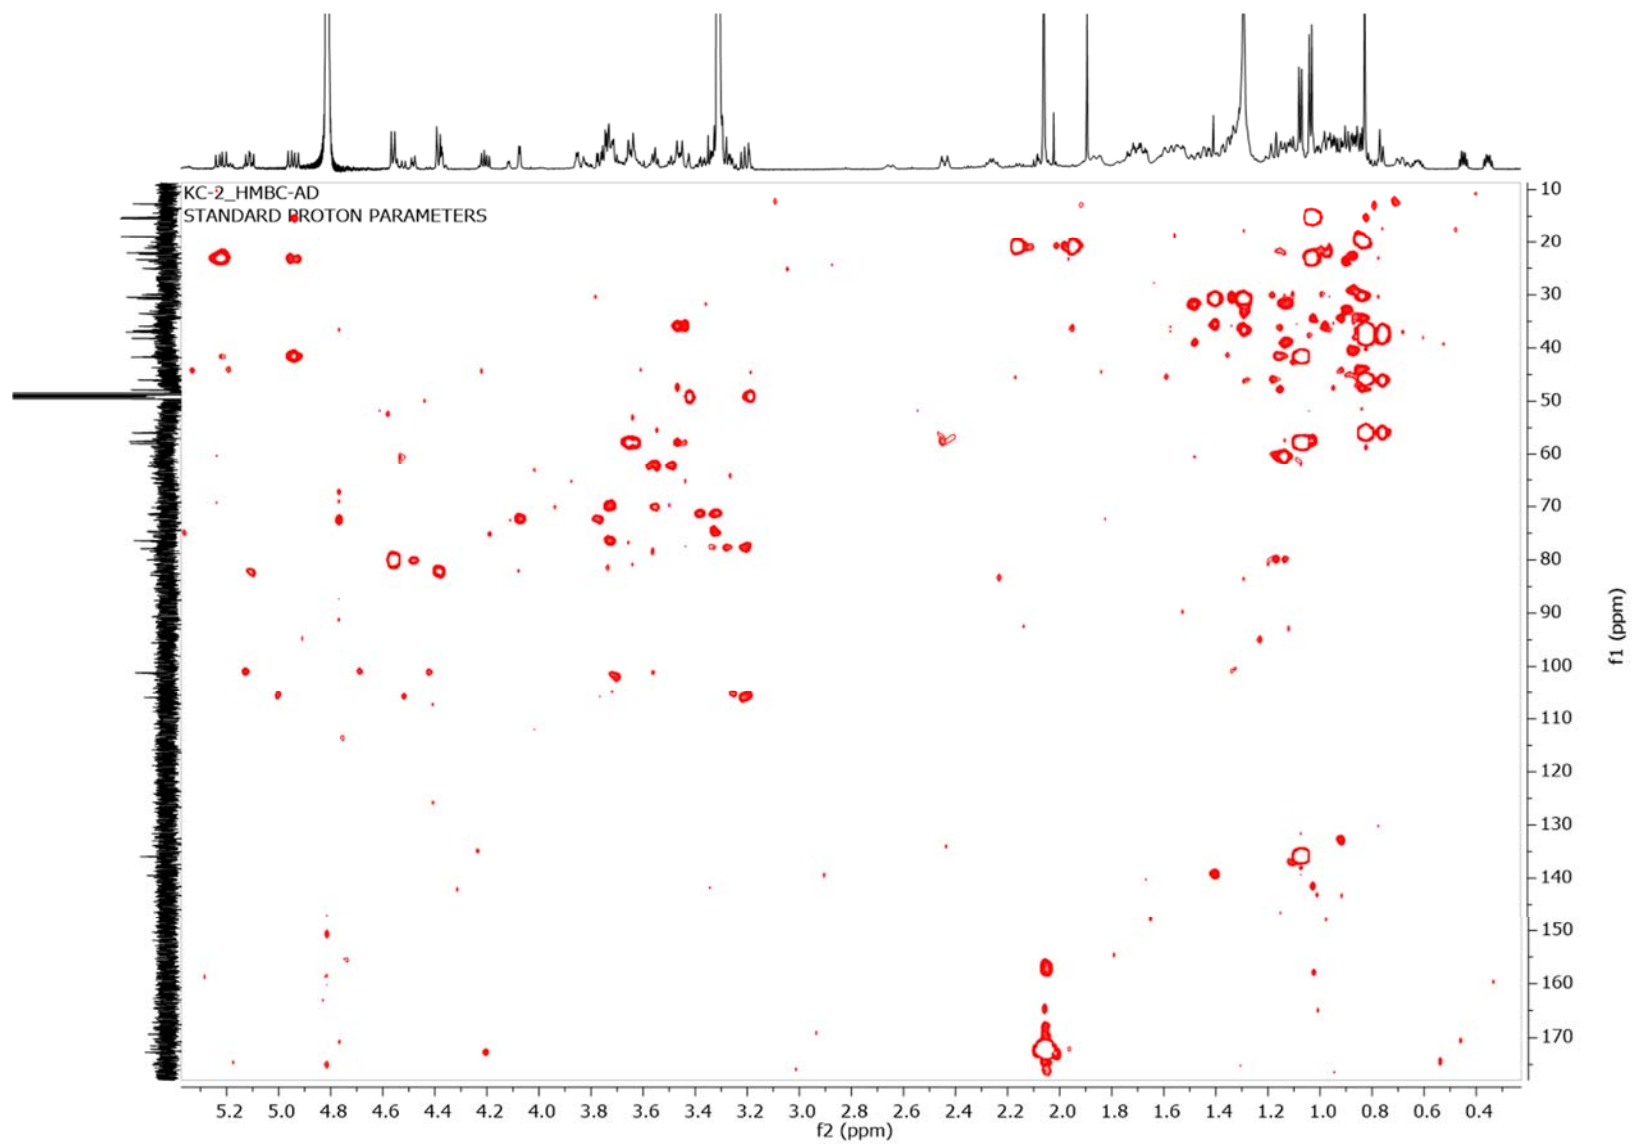

Figure S52. HMBC spectrum of 7 at 600 MHz in CD<sub>3</sub>OD

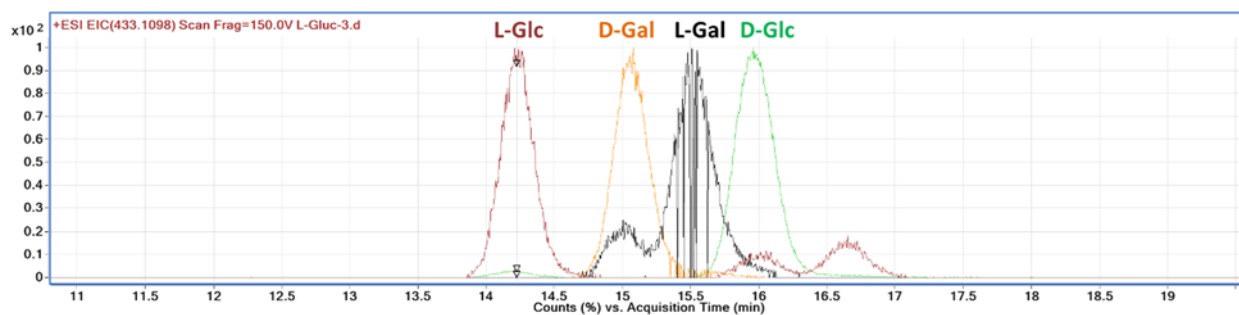

Figure S53. UPLC-qToF analysis of the four monosaccharide derivatives

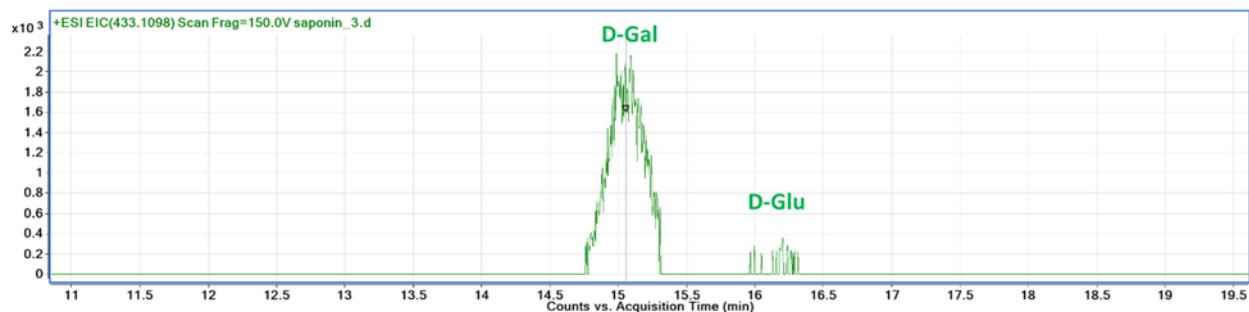

Figure S54. Absolute configuration of the pyranose moieties of 3

$\times 10^5$

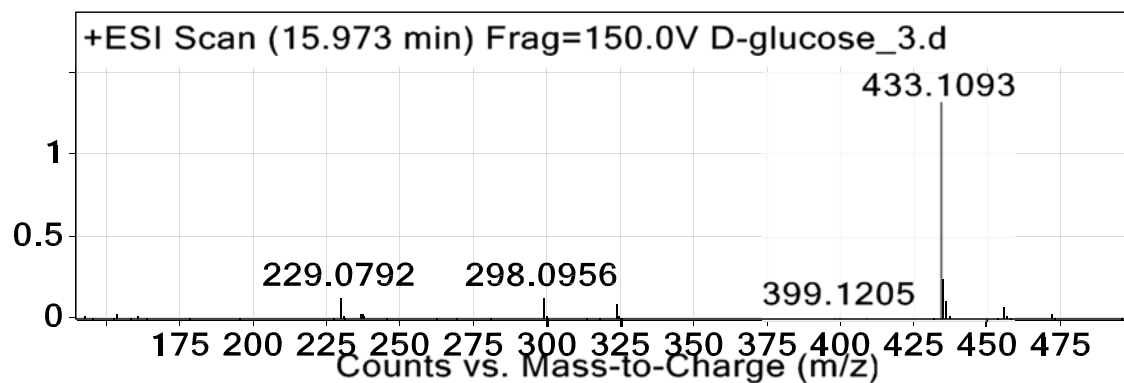

Figure S55. ESI-(+) mass spectrum of D-(+)-glucose derivative
